# Supplementary material
Source: publisher figshare collection journal article supplement (https://acs.figshare.com/ndownloader/files/4683841)
Supplement: Supplementary file 1 [file 4683841]

authors: Tsukasa Matsuo and Hiroyuki Kawaguchi
title: Anisole-Diphenoxide Ligands and Their Zirconium Dichloride and Dialkyl Complexes
data_General
_audit_creation_date                  '2007-05-28'
_audit_creation_method                'by CrystalStructure 3.8'
_audit_update_record                   ?

#==============================================================================

# PROCESSING SUMMARY (IUCr Office Use Only)

_journal_date_recd_electronic     ?
_journal_date_from_coeditor       ?
_journal_date_accepted            ?
_journal_coeditor_code            ?

#==============================================================================

# SUBMISSION DETAILS

_publ_contact_author_name             'ENTER NAME'
_publ_contact_author_email            'ENTER EMAIL ADDRESS'
_publ_contact_author_fax              'ENTER FAX NUMBER'
_publ_contact_author_phone            'ENTER PHONE NUMBER'
_publ_contact_letter
;
    ENTER TEXT OF LETTER
;
_publ_requested_journal               'ENTER JOURNAL NAME HERE'
_publ_requested_category              'FM'
_publ_requested_coeditor_name          ?

#==============================================================================

# TITLE AND AUTHOR LIST

_publ_section_title
;
    ENTER SECTION TITLE
;
_publ_section_title_footnote
;
    ENTER FOOTNOTE TO TITLE OF PAPER
;
loop_
_publ_author_name
_publ_author_footnote
_publ_author_address
' FIRST AUTHORS NAME '
;
  FIRST AUTHORS FOOTNOTES
;
;
  FIRST AUTHORS ADDRESS
;
_publ_section_synopsis
;
  ENTER SYNOPSIS
;

#==============================================================================

# TEXT

_publ_section_abstract
;
    ENTER ABSTRACT
;
_publ_section_comment
;
    ENTER TEXT
;
_publ_section_references
;
    ENTER OTHER REFERENCES

    Rigaku/MSC and Rigaku Corporation. (2006).
    CrystalStructure (Version 3.8). 
    Single Crystal Structure Analysis Software.
    Rigaku/MSC, 9009 TX, USA 77381-5209.
    Rigaku, Tokyo 196-8666, Japan.

    Carruthers, J.R., Rollett,J.S., Betteridge, P.W.,
  Kinna, D., Pearce, L., Larsen, A., and Gabe, E.(1999)
    CRYSTALS Issue 11, Chemical Crystallography Laboratory, Oxford, UK.

;
_publ_section_figure_captions
;
    ENTER FIGURE CAPTIONS
;
_publ_section_exptl_prep
;
    ENTER COMPOUND PREPARATION DETAILS
;
_publ_section_exptl_refinement
;
    ENTER SPECIAL DETAILS OF THE REFINEMENT
;

#==============================================================================

data___(Et2O)2LiH2[tBuO3]
_publ_requested_journal          Inorg.Chem.
_publ_contact_author_name        'Hiroyuki Kawaguchi'
_publ_contact_author_address     'Institute for Molecular Science'
_publ_contact_author_email       hkawa@ims.ac.jp
loop_
_publ_author_name
_publ_author_address
'Matsuo, Tsukasa' 'Institute for Molecular Science'

#==============================================================================

# CHEMICAL DATA

_chemical_formula_sum            'C42 H65 Li O5 '
_chemical_formula_moiety         'C42 H65 Li O5 '
_chemical_formula_weight         656.91
_chemical_melting_point          ?

#==============================================================================

# CRYSTAL DATA
_symmetry_cell_setting           monoclinic
_symmetry_space_group_name_H-M   'P 1 21/n 1'
_symmetry_space_group_name_Hall  '-P 2yn'
_symmetry_Int_Tables_number      14
loop_
_symmetry_equiv_pos_site_id
_symmetry_equiv_pos_as_xyz
1 +X,+Y,+Z
2 1/2-X,1/2+Y,1/2-Z
3 -X,-Y,-Z
4 1/2+X,1/2-Y,1/2+Z

#------------------------------------------------------------------------------

_cell_length_a                   13.256(6)
_cell_length_b                   14.980(6)
_cell_length_c                   20.820(9)
_cell_angle_alpha                90.0000
_cell_angle_beta                 95.641(7)
_cell_angle_gamma                90.0000
_cell_volume                     4114(3)
_cell_formula_units_Z            4
_cell_measurement_reflns_used    8143
_cell_measurement_theta_min      1.5
_cell_measurement_theta_max      13.7
_cell_measurement_temperature    173.1

#------------------------------------------------------------------------------

_exptl_crystal_description       prism
_exptl_crystal_colour            colorless
_exptl_crystal_size_max          0.50
_exptl_crystal_size_mid          0.10
_exptl_crystal_size_min          0.10
_exptl_crystal_density_diffrn    1.061
_exptl_crystal_density_meas      ?
_exptl_crystal_density_method    'not measured'
_exptl_crystal_F_000             1440.00
_exptl_absorpt_coefficient_mu    0.067
_exptl_absorpt_correction_type   none
_exptl_absorpt_correction_T_min  0.689
_exptl_absorpt_correction_T_max  0.993

#==============================================================================

# EXPERIMENTAL DATA

_diffrn_radiation_type           'Mo K\a'
_diffrn_radiation_wavelength     0.71070
_diffrn_measurement_device_type  'Rigaku Mercury'
_diffrn_measurement_method       \w
_diffrn_detector_area_resol_mean 14.62
_diffrn_reflns_number            31881
_diffrn_reflns_av_R_equivalents  0.098
_diffrn_reflns_theta_max         27.48
_diffrn_measured_fraction_theta_max 0.995
_diffrn_reflns_theta_full        25.25
_diffrn_measured_fraction_theta_full 0.995
_diffrn_reflns_limit_h_min       -17
_diffrn_reflns_limit_h_max       17
_diffrn_reflns_limit_k_min       -17
_diffrn_reflns_limit_k_max       19
_diffrn_reflns_limit_l_min       -27
_diffrn_reflns_limit_l_max       21

#==============================================================================

# REFINEMENT DATA

_refine_special_details          
;
    Refinement was performed using reflections with F^2^ > -10.0 sigma(F^2^).
    The weighted     R-factor (wR) and goodness of fit (S) are based on F^2^.
    R-factor (gt) are based on F. The threshold expression of
    F^2^ > 2.0 sigma(F^2^) is used only for calculating R-factor (gt).
;
_reflns_number_total             7401
_reflns_number_gt                3699
_reflns_threshold_expression     F^2^>2.0\s(F^2^)
_refine_ls_structure_factor_coef Fsqd
_refine_ls_R_factor_gt           0.0984
_refine_ls_wR_factor_ref         0.2370
_refine_ls_hydrogen_treatment    refall
_refine_ls_number_reflns         7402
_refine_ls_number_parameters     504
_refine_ls_goodness_of_fit_ref   0.987
_refine_ls_weighting_scheme      calc
_refine_ls_weighting_details     'w = 1/[1.5000\s(Fo^2^)]/(4Fo^2^)'
_refine_ls_shift/su_max          0.0018
_refine_diff_density_max         0.84
_refine_diff_density_min         -0.73
_refine_ls_extinction_method     none
_refine_ls_extinction_coef       ?

loop_
_atom_type_symbol
_atom_type_description
_atom_type_scat_dispersion_real
_atom_type_scat_dispersion_imag
_atom_type_scat_source
C C 0.003 0.002
;
International Tables for Crystallography
(1992, Vol. C, Tables 4.2.6.8 and 6.1.1.4)
;
H H 0.000 0.000
;
International Tables for Crystallography
(1992, Vol. C, Table 6.1.1.4)
;
O O 0.011 0.006
;
International Tables for Crystallography
(1992, Vol. C, Tables 4.2.6.8 and 6.1.1.4)
;
Li Li 0.000 0.000
;
International Tables for Crystallography
(1992, Vol. C, Tables 4.2.6.8 and 6.1.1.4)
;

#==============================================================================

# ATOMIC COORDINATES AND THERMAL PARAMETERS

loop_
_atom_site_label
_atom_site_type_symbol
_atom_site_fract_x
_atom_site_fract_y
_atom_site_fract_z
_atom_site_U_iso_or_equiv
_atom_site_adp_type
_atom_site_occupancy
_atom_site_symmetry_multiplicity
_atom_site_calc_flag
_atom_site_refinement_flags
_atom_site_disorder_assembly
_atom_site_disorder_group
O(1) O 0.8883(2) 0.17325(19) 0.14806(15) 0.0403(9) Uani 1.00 1 d . . .
O(2) O 0.8305(2) 0.09664(16) 0.24862(12) 0.0309(7) Uani 1.00 1 d . . .
O(3) O 0.9521(2) 0.1940(2) 0.32909(14) 0.0396(9) Uani 1.00 1 d . . .
O(4) O 1.0433(2) 0.0004(2) 0.25125(15) 0.0511(10) Uani 1.00 1 d . . .
O(5) O 0.8416(2) -0.0828(2) 0.16114(18) 0.0673(12) Uani 1.00 1 d . . .
C(1) C 0.8197(3) 0.2282(2) 0.11360(18) 0.0341(11) Uani 1.00 1 d . . .
C(2) C 0.8567(3) 0.3008(2) 0.08076(18) 0.0345(11) Uani 1.00 1 d . . .
C(3) C 0.7845(3) 0.3565(2) 0.04669(19) 0.0376(12) Uani 1.00 1 d . . .
C(4) C 0.6814(3) 0.3419(2) 0.04408(19) 0.0408(13) Uani 1.00 1 d . . .
C(5) C 0.6473(3) 0.2684(2) 0.07621(19) 0.0411(12) Uani 1.00 1 d . . .
C(6) C 0.7158(3) 0.2098(2) 0.11079(17) 0.0334(11) Uani 1.00 1 d . . .
C(7) C 0.6759(3) 0.1255(2) 0.14164(18) 0.0342(11) Uani 1.00 1 d . . .
C(8) C 0.7349(3) 0.1137(2) 0.26194(19) 0.0270(10) Uani 1.00 1 d . . .
C(9) C 0.6564(3) 0.1315(2) 0.21228(17) 0.0283(10) Uani 1.00 1 d . . .
C(10) C 0.5593(3) 0.1511(2) 0.22833(19) 0.0314(11) Uani 1.00 1 d . . .
C(11) C 0.5345(3) 0.1536(2) 0.29166(19) 0.0332(11) Uani 1.00 1 d . . .
C(12) C 0.6124(3) 0.1327(2) 0.33986(18) 0.0303(11) Uani 1.00 1 d . . .
C(13) C 0.7103(3) 0.1126(2) 0.32646(18) 0.0284(10) Uani 1.00 1 d . . .
C(14) C 0.7925(3) 0.0917(2) 0.38089(18) 0.0326(11) Uani 1.00 1 d . . .
C(15) C 0.9205(2) 0.2193(2) 0.38645(17) 0.0284(10) Uani 1.00 1 d . . .
C(16) C 0.8442(2) 0.1719(2) 0.41385(18) 0.0278(10) Uani 1.00 1 d . . .
C(17) C 0.8130(3) 0.2007(2) 0.47259(18) 0.0334(11) Uani 1.00 1 d . . .
C(18) C 0.8573(3) 0.2745(2) 0.50480(18) 0.0355(11) Uani 1.00 1 d . . .
C(19) C 0.9338(3) 0.3191(2) 0.47653(19) 0.0359(12) Uani 1.00 1 d . . .
C(20) C 0.9677(3) 0.2947(2) 0.41832(18) 0.0310(11) Uani 1.00 1 d . . .
C(21) C 0.9714(3) 0.3190(3) 0.0819(2) 0.0441(13) Uani 1.00 1 d . . .
C(22) C 1.0175(4) 0.3374(3) 0.1518(2) 0.0605(16) Uani 1.00 1 d . . .
C(23) C 1.0220(3) 0.2374(3) 0.0535(2) 0.0611(17) Uani 1.00 1 d . . .
C(24) C 0.9936(4) 0.4006(3) 0.0416(2) 0.0605(16) Uani 1.00 1 d . . .
C(25) C 0.6067(3) 0.4025(3) 0.0058(2) 0.0560(15) Uani 1.00 1 d . . .
C(26) C 0.4279(3) 0.1765(2) 0.3095(2) 0.0375(12) Uani 1.00 1 d . . .
C(27) C 0.3820(3) 0.0973(3) 0.3421(2) 0.0664(17) Uani 1.00 1 d . . .
C(28) C 0.4356(3) 0.2557(3) 0.3579(2) 0.0680(18) Uani 1.00 1 d . . .
C(29) C 0.3553(3) 0.2036(3) 0.2521(2) 0.0575(15) Uani 1.00 1 d . . .
C(30) C 1.0525(3) 0.3471(2) 0.3898(2) 0.0370(12) Uani 1.00 1 d . . .
C(31) C 1.0963(4) 0.4215(3) 0.4354(2) 0.0591(16) Uani 1.00 1 d . . .
C(32) C 1.1425(3) 0.2854(3) 0.3796(2) 0.0542(15) Uani 1.00 1 d . . .
C(33) C 1.0129(3) 0.3906(3) 0.3257(2) 0.0524(15) Uani 1.00 1 d . . .
C(34) C 0.8246(3) 0.3058(3) 0.5687(2) 0.0596(16) Uani 1.00 1 d . . .
C(35) C 1.0374(5) -0.0790(4) 0.3488(3) 0.099(2) Uani 1.00 1 d . . .
C(36) C 1.0958(5) -0.0208(4) 0.3123(3) 0.092(2) Uani 1.00 1 d . . .
C(37) C 1.1004(4) 0.0602(3) 0.2126(3) 0.0710(19) Uani 1.00 1 d . . .
C(38) C 1.1762(5) 0.0147(4) 0.1780(3) 0.095(2) Uani 1.00 1 d . . .
C(39) C 0.7627(6) -0.1268(4) 0.2558(4) 0.115(3) Uani 1.00 1 d . . .
C(40) C 0.7724(5) -0.1450(4) 0.1884(5) 0.108(2) Uani 1.00 1 d . . .
C(41) C 0.8410(6) -0.0930(5) 0.0944(3) 0.115(3) Uani 1.00 1 d . . .
C(42) C 0.9048(8) -0.0345(5) 0.0660(4) 0.151(4) Uani 1.00 1 d . . .
Li(1) Li 0.8995(5) -0.0014(4) 0.2252(3) 0.047(2) Uani 1.00 1 d . . .
H(1) H 0.8084 0.4072 0.0234 0.045 Uiso 1.00 1 c R . .
H(2) H 0.5751 0.2571 0.0748 0.048 Uiso 1.00 1 c R . .
H(3) H 0.6125 0.1091 0.1172 0.041 Uiso 1.00 1 c R . .
H(4) H 0.7255 0.0786 0.1379 0.041 Uiso 1.00 1 c R . .
H(5) H 0.5067 0.1634 0.1938 0.037 Uiso 1.00 1 c R . .
H(6) H 0.5972 0.1320 0.3845 0.036 Uiso 1.00 1 c R . .
H(7) H 0.7614 0.0574 0.4132 0.039 Uiso 1.00 1 c R . .
H(8) H 0.8441 0.0558 0.3632 0.039 Uiso 1.00 1 c R . .
H(9) H 0.7604 0.1680 0.4918 0.040 Uiso 1.00 1 c R . .
H(10) H 0.9653 0.3703 0.4989 0.042 Uiso 1.00 1 c R . .
H(11) H 1.0045 0.2871 0.1791 0.072 Uiso 1.00 1 c R . .
H(12) H 1.0901 0.3462 0.1522 0.072 Uiso 1.00 1 c R . .
H(13) H 0.9869 0.3907 0.1678 0.072 Uiso 1.00 1 c R . .
H(14) H 1.0092 0.1844 0.0782 0.075 Uiso 1.00 1 c R . .
H(15) H 0.9950 0.2290 0.0089 0.075 Uiso 1.00 1 c R . .
H(16) H 1.0944 0.2480 0.0555 0.075 Uiso 1.00 1 c R . .
H(17) H 1.0663 0.4088 0.0430 0.073 Uiso 1.00 1 c R . .
H(18) H 0.9655 0.3918 -0.0028 0.073 Uiso 1.00 1 c R . .
H(19) H 0.9633 0.4531 0.0590 0.073 Uiso 1.00 1 c R . .
H(20) H 0.6436 0.4501 -0.0130 0.066 Uiso 1.00 1 c R . .
H(21) H 0.5691 0.3685 -0.0282 0.066 Uiso 1.00 1 c R . .
H(22) H 0.5599 0.4279 0.0339 0.066 Uiso 1.00 1 c R . .
H(23) H 0.3168 0.1137 0.3560 0.080 Uiso 1.00 1 c R . .
H(24) H 0.3730 0.0486 0.3113 0.080 Uiso 1.00 1 c R . .
H(25) H 0.4271 0.0786 0.3791 0.080 Uiso 1.00 1 c R . .
H(26) H 0.4817 0.2403 0.3954 0.082 Uiso 1.00 1 c R . .
H(27) H 0.4609 0.3079 0.3371 0.082 Uiso 1.00 1 c R . .
H(28) H 0.3691 0.2684 0.3712 0.082 Uiso 1.00 1 c R . .
H(29) H 0.3813 0.2562 0.2322 0.069 Uiso 1.00 1 c R . .
H(30) H 0.3491 0.1551 0.2211 0.069 Uiso 1.00 1 c R . .
H(31) H 0.2893 0.2168 0.2662 0.069 Uiso 1.00 1 c R . .
H(32) H 1.1248 0.3957 0.4759 0.072 Uiso 1.00 1 c R . .
H(33) H 1.1488 0.4532 0.4154 0.072 Uiso 1.00 1 c R . .
H(34) H 1.0425 0.4627 0.4435 0.072 Uiso 1.00 1 c R . .
H(35) H 1.1708 0.2618 0.4209 0.066 Uiso 1.00 1 c R . .
H(36) H 1.1190 0.2366 0.3514 0.066 Uiso 1.00 1 c R . .
H(37) H 1.1941 0.3189 0.3600 0.066 Uiso 1.00 1 c R . .
H(38) H 1.0680 0.4207 0.3071 0.063 Uiso 1.00 1 c R . .
H(39) H 0.9846 0.3450 0.2961 0.063 Uiso 1.00 1 c R . .
H(40) H 0.9607 0.4336 0.3333 0.063 Uiso 1.00 1 c R . .
H(41) H 0.8816 0.3025 0.6016 0.072 Uiso 1.00 1 c R . .
H(42) H 0.8007 0.3670 0.5647 0.072 Uiso 1.00 1 c R . .
H(43) H 0.7705 0.2677 0.5807 0.072 Uiso 1.00 1 c R . .
H(44) H 0.9734 -0.0510 0.3557 0.121 Uiso 1.00 1 c R . .
H(45) H 1.0247 -0.1343 0.3252 0.121 Uiso 1.00 1 c R . .
H(46) H 1.0751 -0.0915 0.3901 0.121 Uiso 1.00 1 c R . .
H(47) H 1.1596 -0.0493 0.3057 0.107 Uiso 1.00 1 c R . .
H(48) H 1.1088 0.0341 0.3364 0.107 Uiso 1.00 1 c R . .
H(49) H 1.0529 0.0904 0.1815 0.086 Uiso 1.00 1 c R . .
H(50) H 1.1350 0.1039 0.2413 0.086 Uiso 1.00 1 c R . .
H(51) H 1.1430 -0.0300 0.1495 0.115 Uiso 1.00 1 c R . .
H(52) H 1.2097 0.0579 0.1526 0.115 Uiso 1.00 1 c R . .
H(53) H 1.2260 -0.0139 0.2085 0.115 Uiso 1.00 1 c R . .
H(54) H 0.8285 -0.1319 0.2804 0.136 Uiso 1.00 1 c R . .
H(55) H 0.7367 -0.0668 0.2602 0.136 Uiso 1.00 1 c R . .
H(56) H 0.7163 -0.1694 0.2720 0.136 Uiso 1.00 1 c R . .
H(57) H 0.7063 -0.1397 0.1642 0.129 Uiso 1.00 1 c R . .
H(58) H 0.7977 -0.2053 0.1845 0.129 Uiso 1.00 1 c R . .
H(59) H 0.8623 -0.1534 0.0857 0.134 Uiso 1.00 1 c R . .
H(60) H 0.7723 -0.0838 0.0748 0.134 Uiso 1.00 1 c R . .
H(61) H 0.9739 -0.0437 0.0847 0.188 Uiso 1.00 1 c R . .
H(62) H 0.9007 -0.0445 0.0198 0.188 Uiso 1.00 1 c R . .
H(63) H 0.8842 0.0262 0.0744 0.188 Uiso 1.00 1 c R . .
H(64) H 0.856(4) 0.152(3) 0.182(2) 0.083(18) Uiso 1.00 1 c . . .
H(65) H 0.911(4) 0.158(3) 0.305(2) 0.09(2) Uiso 1.00 1 c . . .


loop_
_atom_site_aniso_label
_atom_site_aniso_U_11
_atom_site_aniso_U_22
_atom_site_aniso_U_33
_atom_site_aniso_U_12
_atom_site_aniso_U_13
_atom_site_aniso_U_23
O(1) 0.0367(18) 0.0457(17) 0.0391(17) 0.0038(14) 0.0060(14) 0.0105(14)
O(2) 0.0260(16) 0.0333(14) 0.0333(15) -0.0001(12) 0.0032(12) 0.0023(12)
O(3) 0.0386(19) 0.0472(17) 0.0345(17) -0.0076(15) 0.0110(14) -0.0161(14)
O(4) 0.0367(19) 0.0543(19) 0.061(2) 0.0007(15) -0.0028(16) -0.0030(16)
O(5) 0.064(2) 0.055(2) 0.077(2) 0.0090(19) -0.022(2) -0.0260(19)
C(1) 0.037(2) 0.037(2) 0.028(2) 0.006(2) 0.0029(19) -0.0008(19)
C(2) 0.047(2) 0.037(2) 0.0195(19) -0.003(2) 0.0033(18) -0.0041(18)
C(3) 0.044(2) 0.041(2) 0.027(2) -0.008(2) -0.003(2) 0.0028(19)
C(4) 0.055(3) 0.040(2) 0.024(2) 0.007(2) -0.011(2) -0.0026(19)
C(5) 0.047(2) 0.048(2) 0.026(2) 0.004(2) -0.010(2) -0.001(2)
C(6) 0.036(2) 0.044(2) 0.019(2) -0.002(2) -0.0029(17) -0.0027(18)
C(7) 0.031(2) 0.043(2) 0.028(2) -0.0053(19) 0.0025(18) -0.0066(18)
C(8) 0.025(2) 0.0199(19) 0.037(2) 0.0001(16) 0.0035(17) 0.0003(16)
C(9) 0.030(2) 0.033(2) 0.0204(19) -0.0063(18) -0.0024(17) -0.0010(16)
C(10) 0.025(2) 0.036(2) 0.031(2) -0.0020(18) -0.0077(17) 0.0027(18)
C(11) 0.026(2) 0.035(2) 0.037(2) -0.0069(18) -0.0010(19) 0.0037(18)
C(12) 0.033(2) 0.032(2) 0.026(2) -0.0011(18) 0.0013(18) -0.0002(17)
C(13) 0.032(2) 0.0236(19) 0.029(2) -0.0001(17) 0.0003(17) 0.0026(16)
C(14) 0.030(2) 0.038(2) 0.029(2) -0.0013(19) 0.0003(18) 0.0095(18)
C(15) 0.025(2) 0.037(2) 0.023(2) 0.0055(18) 0.0001(16) -0.0013(17)
C(16) 0.016(2) 0.041(2) 0.026(2) 0.0041(17) -0.0008(16) 0.0063(18)
C(17) 0.019(2) 0.053(2) 0.027(2) 0.0021(19) -0.0005(17) 0.0038(19)
C(18) 0.027(2) 0.054(2) 0.025(2) 0.013(2) -0.0019(17) 0.000(2)
C(19) 0.033(2) 0.045(2) 0.028(2) 0.002(2) -0.0047(18) -0.0071(19)
C(20) 0.028(2) 0.036(2) 0.028(2) 0.0013(18) -0.0019(17) -0.0014(18)
C(21) 0.043(2) 0.054(2) 0.036(2) -0.003(2) 0.008(2) 0.013(2)
C(22) 0.056(3) 0.077(3) 0.047(2) -0.028(2) -0.003(2) 0.010(2)
C(23) 0.053(3) 0.077(3) 0.057(3) 0.010(2) 0.025(2) 0.016(2)
C(24) 0.057(3) 0.074(3) 0.052(3) 0.003(2) 0.010(2) 0.021(2)
C(25) 0.072(3) 0.055(2) 0.037(2) 0.016(2) -0.013(2) -0.004(2)
C(26) 0.024(2) 0.051(2) 0.036(2) -0.002(2) -0.0019(18) 0.004(2)
C(27) 0.043(3) 0.096(4) 0.061(3) -0.005(2) 0.009(2) 0.027(3)
C(28) 0.034(3) 0.091(3) 0.080(3) 0.017(2) 0.008(2) -0.024(3)
C(29) 0.034(2) 0.090(3) 0.049(2) 0.003(2) 0.004(2) 0.011(2)
C(30) 0.031(2) 0.040(2) 0.041(2) -0.0080(19) 0.0056(19) -0.005(2)
C(31) 0.059(3) 0.062(3) 0.058(3) -0.027(2) 0.014(2) -0.011(2)
C(32) 0.034(2) 0.066(3) 0.064(3) -0.018(2) 0.014(2) -0.006(2)
C(33) 0.058(3) 0.048(2) 0.051(2) -0.013(2) 0.009(2) 0.011(2)
C(34) 0.051(3) 0.094(3) 0.035(2) -0.001(2) 0.009(2) -0.009(2)
C(35) 0.110(6) 0.103(5) 0.090(4) 0.013(4) 0.043(4) 0.018(4)
C(36) 0.088(5) 0.090(4) 0.089(4) -0.017(3) -0.030(4) 0.016(3)
C(37) 0.047(3) 0.066(3) 0.102(4) -0.008(2) 0.018(3) 0.008(3)
C(38) 0.083(5) 0.112(5) 0.093(4) -0.023(4) 0.030(4) -0.021(4)
C(39) 0.109(6) 0.060(4) 0.172(8) -0.027(4) -0.004(6) 0.047(4)
C(40) 0.049(4) 0.049(3) 0.225(9) -0.017(3) 0.002(5) -0.035(5)
C(41) 0.137(7) 0.119(6) 0.081(5) 0.058(5) -0.030(4) -0.058(4)
C(42) 0.236(11) 0.100(5) 0.135(7) -0.048(6) 0.114(7) -0.055(5)
Li(1) 0.035(4) 0.051(4) 0.056(4) 0.000(3) 0.009(3) -0.017(3)

#==============================================================================

_computing_data_collection       CrystalClear
_computing_cell_refinement       CrystalClear
_computing_data_reduction        CrystalStructure
_computing_structure_solution    SIR97
_computing_structure_refinement  CRYSTALS
_computing_publication_material  'CrystalStructure 3.8'
_computing_molecular_graphics    ?

#==============================================================================

# MOLECULAR GEOMETRY

_geom_special_details            
;
    ENTER SPECIAL DETAILS OF THE MOLECULAR GEOMETRY
;

loop_
_geom_bond_atom_site_label_1
_geom_bond_atom_site_label_2
_geom_bond_distance
_geom_bond_publ_flag
_geom_bond_site_symmetry_1
_geom_bond_site_symmetry_2
O(1) C(1) 1.375(4) yes . .
O(2) C(8) 1.349(4) yes . .
O(2) Li(1) 1.822(7) yes . .
O(3) C(15) 1.358(4) yes . .
O(4) C(36) 1.424(7) yes . .
O(4) C(37) 1.465(6) yes . .
O(4) Li(1) 1.929(8) yes . .
O(5) C(40) 1.460(8) yes . .
O(5) C(41) 1.396(8) yes . .
O(5) Li(1) 1.912(8) yes . .
C(1) C(2) 1.399(5) yes . .
C(1) C(6) 1.399(5) yes . .
C(2) C(3) 1.409(5) yes . .
C(2) C(21) 1.543(6) yes . .
C(3) C(4) 1.380(6) yes . .
C(4) C(5) 1.387(6) yes . .
C(4) C(25) 1.511(6) yes . .
C(5) C(6) 1.409(5) yes . .
C(6) C(7) 1.534(5) yes . .
C(7) C(9) 1.521(5) yes . .
C(8) C(9) 1.418(5) yes . .
C(8) C(13) 1.413(5) yes . .
C(9) C(10) 1.392(5) yes . .
C(10) C(11) 1.391(5) yes . .
C(11) C(12) 1.403(5) yes . .
C(11) C(26) 1.535(5) yes . .
C(12) C(13) 1.387(5) yes . .
C(13) C(14) 1.525(5) yes . .
C(14) C(16) 1.514(5) yes . .
C(15) C(16) 1.403(5) yes . .
C(15) C(20) 1.422(5) yes . .
C(16) C(17) 1.397(5) yes . .
C(17) C(18) 1.393(5) yes . .
C(18) C(19) 1.392(6) yes . .
C(18) C(34) 1.513(6) yes . .
C(19) C(20) 1.383(5) yes . .
C(20) C(30) 1.537(5) yes . .
C(21) C(22) 1.546(6) yes . .
C(21) C(23) 1.539(6) yes . .
C(21) C(24) 1.528(6) yes . .
C(26) C(27) 1.523(6) yes . .
C(26) C(28) 1.552(6) yes . .
C(26) C(29) 1.514(5) yes . .
C(30) C(31) 1.541(6) yes . .
C(30) C(32) 1.539(6) yes . .
C(30) C(33) 1.531(6) yes . .
C(35) C(36) 1.431(9) yes . .
C(37) C(38) 1.462(9) yes . .
C(39) C(40) 1.447(13) yes . .
C(41) C(42) 1.390(12) yes . .

loop_
_geom_angle_atom_site_label_1
_geom_angle_atom_site_label_2
_geom_angle_atom_site_label_3
_geom_angle
_geom_angle_publ_flag
_geom_angle_site_symmetry_1
_geom_angle_site_symmetry_2
_geom_angle_site_symmetry_3
C(8) O(2) Li(1) 135.6(3) yes . . .
C(36) O(4) C(37) 113.2(4) yes . . .
C(36) O(4) Li(1) 129.1(4) yes . . .
C(37) O(4) Li(1) 113.8(3) yes . . .
C(40) O(5) C(41) 112.0(5) yes . . .
C(40) O(5) Li(1) 111.1(4) yes . . .
C(41) O(5) Li(1) 136.6(4) yes . . .
O(1) C(1) C(2) 118.3(3) yes . . .
O(1) C(1) C(6) 120.1(3) yes . . .
C(2) C(1) C(6) 121.6(3) yes . . .
C(1) C(2) C(3) 116.9(3) yes . . .
C(1) C(2) C(21) 121.5(3) yes . . .
C(3) C(2) C(21) 121.6(3) yes . . .
C(2) C(3) C(4) 123.2(3) yes . . .
C(3) C(4) C(5) 118.4(3) yes . . .
C(3) C(4) C(25) 121.4(3) yes . . .
C(5) C(4) C(25) 120.2(4) yes . . .
C(4) C(5) C(6) 121.2(4) yes . . .
C(1) C(6) C(5) 118.7(3) yes . . .
C(1) C(6) C(7) 121.5(3) yes . . .
C(5) C(6) C(7) 119.7(3) yes . . .
C(6) C(7) C(9) 117.0(3) yes . . .
O(2) C(8) C(9) 121.5(3) yes . . .
O(2) C(8) C(13) 120.1(3) yes . . .
C(9) C(8) C(13) 118.3(3) yes . . .
C(7) C(9) C(8) 120.8(3) yes . . .
C(7) C(9) C(10) 119.6(3) yes . . .
C(8) C(9) C(10) 119.6(3) yes . . .
C(9) C(10) C(11) 123.0(3) yes . . .
C(10) C(11) C(12) 116.5(3) yes . . .
C(10) C(11) C(26) 123.1(3) yes . . .
C(12) C(11) C(26) 120.5(3) yes . . .
C(11) C(12) C(13) 122.9(3) yes . . .
C(8) C(13) C(12) 119.7(3) yes . . .
C(8) C(13) C(14) 119.6(3) yes . . .
C(12) C(13) C(14) 120.6(3) yes . . .
C(13) C(14) C(16) 115.6(3) yes . . .
O(3) C(15) C(16) 120.8(3) yes . . .
O(3) C(15) C(20) 118.2(3) yes . . .
C(16) C(15) C(20) 120.9(3) yes . . .
C(14) C(16) C(15) 122.0(3) yes . . .
C(14) C(16) C(17) 118.8(3) yes . . .
C(15) C(16) C(17) 119.1(3) yes . . .
C(16) C(17) C(18) 121.3(3) yes . . .
C(17) C(18) C(19) 117.9(3) yes . . .
C(17) C(18) C(34) 121.7(3) yes . . .
C(19) C(18) C(34) 120.4(3) yes . . .
C(18) C(19) C(20) 123.8(3) yes . . .
C(15) C(20) C(19) 116.9(3) yes . . .
C(15) C(20) C(30) 122.0(3) yes . . .
C(19) C(20) C(30) 121.1(3) yes . . .
C(2) C(21) C(22) 110.1(3) yes . . .
C(2) C(21) C(23) 108.7(3) yes . . .
C(2) C(21) C(24) 112.0(3) yes . . .
C(22) C(21) C(23) 110.9(3) yes . . .
C(22) C(21) C(24) 107.1(3) yes . . .
C(23) C(21) C(24) 108.1(3) yes . . .
C(11) C(26) C(27) 110.6(3) yes . . .
C(11) C(26) C(28) 108.9(3) yes . . .
C(11) C(26) C(29) 113.4(3) yes . . .
C(27) C(26) C(28) 108.1(3) yes . . .
C(27) C(26) C(29) 108.0(3) yes . . .
C(28) C(26) C(29) 107.7(3) yes . . .
C(20) C(30) C(31) 112.1(3) yes . . .
C(20) C(30) C(32) 110.7(3) yes . . .
C(20) C(30) C(33) 110.7(3) yes . . .
C(31) C(30) C(32) 105.6(3) yes . . .
C(31) C(30) C(33) 107.8(3) yes . . .
C(32) C(30) C(33) 109.8(3) yes . . .
O(4) C(36) C(35) 111.5(5) yes . . .
O(4) C(37) C(38) 113.7(4) yes . . .
O(5) C(40) C(39) 112.1(5) yes . . .
O(5) C(41) C(42) 114.2(6) yes . . .
O(2) Li(1) O(4) 114.9(3) yes . . .
O(2) Li(1) O(5) 121.5(4) yes . . .
O(4) Li(1) O(5) 121.5(4) yes . . .

loop_
_geom_torsion_atom_site_label_1
_geom_torsion_atom_site_label_2
_geom_torsion_atom_site_label_3
_geom_torsion_atom_site_label_4
_geom_torsion
_geom_torsion_publ_flag
_geom_torsion_site_symmetry_1
_geom_torsion_site_symmetry_2
_geom_torsion_site_symmetry_3
_geom_torsion_site_symmetry_4
C(8) O(2) Li(1) O(4) -152.1(3) ? . . . .
C(8) O(2) Li(1) O(5) 43.7(7) ? . . . .
Li(1) O(2) C(8) C(9) -83.7(5) ? . . . .
Li(1) O(2) C(8) C(13) 95.2(5) ? . . . .
C(36) O(4) C(37) C(38) 81.7(5) ? . . . .
C(37) O(4) C(36) C(35) 179.7(5) ? . . . .
C(36) O(4) Li(1) O(2) 80.9(6) ? . . . .
C(36) O(4) Li(1) O(5) -114.9(5) ? . . . .
Li(1) O(4) C(36) C(35) 23.7(7) ? . . . .
C(37) O(4) Li(1) O(2) -74.9(5) ? . . . .
C(37) O(4) Li(1) O(5) 89.3(5) ? . . . .
Li(1) O(4) C(37) C(38) -118.5(4) ? . . . .
C(40) O(5) C(41) C(42) 179.2(6) ? . . . .
C(41) O(5) C(40) C(39) -172.3(5) ? . . . .
C(40) O(5) Li(1) O(2) -80.6(5) ? . . . .
C(40) O(5) Li(1) O(4) 116.3(5) ? . . . .
Li(1) O(5) C(40) C(39) 2.2(6) ? . . . .
C(41) O(5) Li(1) O(2) 92.0(7) ? . . . .
C(41) O(5) Li(1) O(4) -71.1(8) ? . . . .
Li(1) O(5) C(41) C(42) 6.7(11) ? . . . .
O(1) C(1) C(2) C(3) -179.1(3) ? . . . .
O(1) C(1) C(2) C(21) 0.8(5) ? . . . .
O(1) C(1) C(6) C(5) 178.7(3) ? . . . .
O(1) C(1) C(6) C(7) -4.2(5) ? . . . .
C(2) C(1) C(6) C(5) -2.8(5) ? . . . .
C(2) C(1) C(6) C(7) 174.3(3) ? . . . .
C(6) C(1) C(2) C(3) 2.4(5) ? . . . .
C(6) C(1) C(2) C(21) -177.7(3) ? . . . .
C(1) C(2) C(3) C(4) -0.7(5) ? . . . .
C(1) C(2) C(21) C(22) -62.1(5) ? . . . .
C(1) C(2) C(21) C(23) 59.6(4) ? . . . .
C(1) C(2) C(21) C(24) 178.9(3) ? . . . .
C(3) C(2) C(21) C(22) 117.9(4) ? . . . .
C(3) C(2) C(21) C(23) -120.5(4) ? . . . .
C(3) C(2) C(21) C(24) -1.2(5) ? . . . .
C(21) C(2) C(3) C(4) 179.4(3) ? . . . .
C(2) C(3) C(4) C(5) -0.5(6) ? . . . .
C(2) C(3) C(4) C(25) -178.8(3) ? . . . .
C(3) C(4) C(5) C(6) 0.0(5) ? . . . .
C(25) C(4) C(5) C(6) 178.4(3) ? . . . .
C(4) C(5) C(6) C(1) 1.6(5) ? . . . .
C(4) C(5) C(6) C(7) -175.6(3) ? . . . .
C(1) C(6) C(7) C(9) 87.8(4) ? . . . .
C(5) C(6) C(7) C(9) -95.2(4) ? . . . .
C(6) C(7) C(9) C(8) -87.7(4) ? . . . .
C(6) C(7) C(9) C(10) 95.0(4) ? . . . .
O(2) C(8) C(9) C(7) 4.4(5) ? . . . .
O(2) C(8) C(9) C(10) -178.3(3) ? . . . .
O(2) C(8) C(13) C(12) 178.2(3) ? . . . .
O(2) C(8) C(13) C(14) -0.2(3) ? . . . .
C(9) C(8) C(13) C(12) -2.9(5) ? . . . .
C(9) C(8) C(13) C(14) 178.7(3) ? . . . .
C(13) C(8) C(9) C(7) -174.5(3) ? . . . .
C(13) C(8) C(9) C(10) 2.8(5) ? . . . .
C(7) C(9) C(10) C(11) 176.9(3) ? . . . .
C(8) C(9) C(10) C(11) -0.5(5) ? . . . .
C(9) C(10) C(11) C(12) -1.7(5) ? . . . .
C(9) C(10) C(11) C(26) 179.1(3) ? . . . .
C(10) C(11) C(12) C(13) 1.6(5) ? . . . .
C(10) C(11) C(26) C(27) 116.6(4) ? . . . .
C(10) C(11) C(26) C(28) -124.7(4) ? . . . .
C(10) C(11) C(26) C(29) -4.9(5) ? . . . .
C(12) C(11) C(26) C(27) -62.5(4) ? . . . .
C(12) C(11) C(26) C(28) 56.1(4) ? . . . .
C(12) C(11) C(26) C(29) 176.0(3) ? . . . .
C(26) C(11) C(12) C(13) -179.2(3) ? . . . .
C(11) C(12) C(13) C(8) 0.7(5) ? . . . .
C(11) C(12) C(13) C(14) 179.0(3) ? . . . .
C(8) C(13) C(14) C(16) 95.2(4) ? . . . .
C(12) C(13) C(14) C(16) -83.1(4) ? . . . .
C(13) C(14) C(16) C(15) -79.2(4) ? . . . .
C(13) C(14) C(16) C(17) 99.3(4) ? . . . .
O(3) C(15) C(16) C(14) -0.8(5) ? . . . .
O(3) C(15) C(16) C(17) -179.3(3) ? . . . .
O(3) C(15) C(20) C(19) 179.7(3) ? . . . .
O(3) C(15) C(20) C(30) -0.1(4) ? . . . .
C(16) C(15) C(20) C(19) -0.9(5) ? . . . .
C(16) C(15) C(20) C(30) 179.2(3) ? . . . .
C(20) C(15) C(16) C(14) 179.9(3) ? . . . .
C(20) C(15) C(16) C(17) 1.4(5) ? . . . .
C(14) C(16) C(17) C(18) -179.5(3) ? . . . .
C(15) C(16) C(17) C(18) -0.9(5) ? . . . .
C(16) C(17) C(18) C(19) 0.1(4) ? . . . .
C(16) C(17) C(18) C(34) -179.6(3) ? . . . .
C(17) C(18) C(19) C(20) 0.4(6) ? . . . .
C(34) C(18) C(19) C(20) -180.0(3) ? . . . .
C(18) C(19) C(20) C(15) 0.0(4) ? . . . .
C(18) C(19) C(20) C(30) 179.9(3) ? . . . .
C(15) C(20) C(30) C(31) -176.1(3) ? . . . .
C(15) C(20) C(30) C(32) -58.5(4) ? . . . .
C(15) C(20) C(30) C(33) 63.5(4) ? . . . .
C(19) C(20) C(30) C(31) 4.1(5) ? . . . .
C(19) C(20) C(30) C(32) 121.7(4) ? . . . .
C(19) C(20) C(30) C(33) -116.3(4) ? . . . .

loop_
_geom_contact_atom_site_label_1
_geom_contact_atom_site_label_2
_geom_contact_distance
_geom_contact_publ_flag
_geom_contact_site_symmetry_1
_geom_contact_site_symmetry_2
C(5) C(19) 3.590(5) ? . 4_454
C(15) C(40) 3.510(7) ? . 2_655
C(19) C(5) 3.590(5) ? . 4_555
C(24) C(24) 3.456(7) ? . 3_765
C(40) C(15) 3.510(7) ? . 2_645


#==============================================================================

# Additional structures and associated data_? identifiers
# should be added at this point if there is more than one 
# structure analysis in the CIF.

#==============================================================================

#     End of CIF

#==============================================================================
#===END
data_General
_publ_requested_journal          Inorg.Chem.

#==============================================================================

# SUBMISSION DETAILS

_publ_contact_author_name        'Hiroyuki Kawaguchi'
_publ_contact_author_email       hkawa@ims.ac.jp
_publ_contact_author_phone       'ENTER PHONE NUMBER'
_publ_contact_author_fax         'ENTER FAX NUMBER'
loop_
_publ_author_name
_publ_author_address
'Matsuo, Tsukasa'
;
  FIRST AUTHORS ADDRESS
;
_audit_creation_date             2007-05-28
_audit_creation_method           'by CrystalStructure 3.8'
_audit_update_record             ?

#==============================================================================

# PROCESSING SUMMARY (IUCr Office Use Only)

_journal_date_recd_electronic    ?
_journal_date_from_coeditor      ?
_journal_date_accepted           ?
_journal_coeditor_code           ?
_publ_contact_letter             
;
    ENTER TEXT OF LETTER
;
_publ_requested_category         'FO'
_publ_requested_coeditor_name    ?

#==============================================================================

# TITLE AND AUTHOR LIST

_publ_section_title              
;
    ENTER SECTION TITLE
;
_publ_section_title_footnote     
;
    ENTER FOOTNOTE TO TITLE OF PAPER
;
loop_
_publ_author_footnote
;
  FIRST AUTHORS FOOTNOTES
;
_publ_section_synopsis           
;
  ENTER SYNOPSIS
;

#==============================================================================

# TEXT

_publ_section_abstract           
;
    ENTER ABSTRACT
;
_publ_section_comment            
;
    ENTER TEXT
;
_publ_section_references         
;
    ENTER OTHER REFERENCES

    Rigaku/MSC and Rigaku Corporation. (2006).
    CrystalStructure (Version 3.8). 
    Single Crystal Structure Analysis Software.
    Rigaku/MSC, 9009 TX, USA 77381-5209.
    Rigaku, Tokyo 196-8666, Japan.

    Carruthers, J.R., Rollett,J.S., Betteridge, P.W.,
  Kinna, D., Pearce, L., Larsen, A., and Gabe, E.(1999)
    CRYSTALS Issue 11, Chemical Crystallography Laboratory, Oxford, UK.

;
_publ_section_figure_captions    
;
    ENTER FIGURE CAPTIONS
;
_publ_section_exptl_prep         
;
    ENTER COMPOUND PREPARATION DETAILS
;
_publ_section_exptl_refinement   
;
    ENTER SPECIAL DETAILS OF THE REFINEMENT
;

#==============================================================================

data___H2[MeO2O]

#==============================================================================

# CHEMICAL DATA

_chemical_formula_sum                  'C32 H42 O3 '
_chemical_formula_moiety               'C32 H42 O3 '
_chemical_formula_weight               474.68
_chemical_melting_point                ?

#==============================================================================

# CRYSTAL DATA
_symmetry_cell_setting                 monoclinic
_symmetry_space_group_name_H-M        'P 1 21/m 1'
_symmetry_space_group_name_Hall       '-P 2yb'
_symmetry_Int_Tables_number            11
loop_
_symmetry_equiv_pos_site_id
_symmetry_equiv_pos_as_xyz
1   '+X,+Y,+Z'
2   '-X,1/2+Y,-Z'
3   '-X,-Y,-Z'
4   '+X,1/2-Y,+Z'

#------------------------------------------------------------------------------

_cell_length_a                         5.973(4)
_cell_length_b                         25.500(15)
_cell_length_c                         9.858(7)
_cell_angle_alpha                      90.0000
_cell_angle_beta                       113.752(9)
_cell_angle_gamma                      90.0000
_cell_volume                           1374.2(16)
_cell_formula_units_Z                  2
_cell_measurement_reflns_used          4455
_cell_measurement_theta_min            3.5
_cell_measurement_theta_max            27.5
_cell_measurement_temperature          173.1

#------------------------------------------------------------------------------

_exptl_crystal_description            'prism'
_exptl_crystal_colour                 'colorless'
_exptl_crystal_size_max                0.30
_exptl_crystal_size_mid                0.20
_exptl_crystal_size_min                0.20
_exptl_crystal_density_diffrn          1.147
_exptl_crystal_density_meas            ?
_exptl_crystal_density_method         'not measured'
_exptl_crystal_F_000                   516.00
_exptl_absorpt_coefficient_mu          0.071
_exptl_absorpt_correction_type         none

#==============================================================================

# EXPERIMENTAL DATA

_diffrn_radiation_type                'Mo K\a'
_diffrn_radiation_wavelength           0.71070
_diffrn_measurement_device_type       'Rigaku Mercury'
_diffrn_measurement_method             \w
_diffrn_detector_area_resol_mean       7.31
_diffrn_reflns_number                  3135
_diffrn_reflns_av_R_equivalents        ?
_diffrn_reflns_theta_max               27.48
_diffrn_measured_fraction_theta_max    0.972
_diffrn_reflns_theta_full              27.50
_diffrn_measured_fraction_theta_full   0.970
_diffrn_reflns_limit_h_min             0
_diffrn_reflns_limit_h_max             7
_diffrn_reflns_limit_k_min             0
_diffrn_reflns_limit_k_max             33
_diffrn_reflns_limit_l_min             -12
_diffrn_reflns_limit_l_max             11

#==============================================================================

# REFINEMENT DATA

_refine_special_details
;
    Refinement was performed using all reflections. The weighted 
    R-factor (wR) and goodness of fit (S) are based on F^2^.
    R-factor (gt) are based on F. The threshold expression of
    F^2^ > 2.0 sigma(F^2^) is used only for calculating R-factor (gt).
;
_reflns_number_total                   3135
_reflns_number_gt                      2728
_reflns_threshold_expression           F^2^>2.0\s(F^2^)
_refine_ls_structure_factor_coef       Fsqd
_refine_ls_R_factor_gt                 0.0543
_refine_ls_wR_factor_ref               0.1140
_refine_ls_hydrogen_treatment          refall
_refine_ls_number_reflns               3135
_refine_ls_number_parameters           252
_refine_ls_goodness_of_fit_ref         0.966
_refine_ls_weighting_scheme            calc
_refine_ls_weighting_details
'w = 1/[0.0010Fo^2^ + 3.0000\s(Fo^2^) + 0.5000]/(4Fo^2^)'
_refine_ls_shift/su_max                0.0000
_refine_diff_density_max               0.28
_refine_diff_density_min               -0.31
_refine_ls_extinction_method           none
_refine_ls_extinction_coef             ?

loop_
_atom_type_symbol
_atom_type_description
_atom_type_scat_dispersion_real
_atom_type_scat_dispersion_imag
_atom_type_scat_source
  'C' 'C'  0.003 0.002 
;
International Tables for Crystallography
(1992, Vol. C, Tables 4.2.6.8 and 6.1.1.4)
;
  'H' 'H'  0.000 0.000 
;
International Tables for Crystallography
(1992, Vol. C, Table 6.1.1.4)
;
  'O' 'O'  0.011 0.006 
;
International Tables for Crystallography
(1992, Vol. C, Tables 4.2.6.8 and 6.1.1.4)
;

#==============================================================================

# ATOMIC COORDINATES AND THERMAL PARAMETERS

loop_
_atom_site_label
_atom_site_type_symbol
_atom_site_fract_x
_atom_site_fract_y
_atom_site_fract_z
_atom_site_U_iso_or_equiv
_atom_site_adp_type
_atom_site_occupancy
_atom_site_symmetry_multiplicity
_atom_site_calc_flag
_atom_site_refinement_flags
_atom_site_disorder_assembly
_atom_site_disorder_group
 O(1) O 0.16715(17) 0.17043(4) 0.82206(10) 0.0294(2) Uani 1.00 1 d . . .
 O(2) O -0.0022(2) 0.2500 0.99007(13) 0.0251(3) Uani 1.00 2 d S . .
 C(1) C 0.3294(2) 0.13213(5) 0.90346(13) 0.0221(3) Uani 1.00 1 d . . .
 C(2) C 0.4651(2) 0.10532(5) 0.83638(14) 0.0242(3) Uani 1.00 1 d . . .
 C(3) C 0.6379(2) 0.06933(5) 0.92465(15) 0.0279(3) Uani 1.00 1 d . . .
 C(4) C 0.6770(2) 0.05818(5) 1.07089(15) 0.0276(3) Uani 1.00 1 d . . .
 C(5) C 0.5299(2) 0.08333(5) 1.12883(15) 0.0267(3) Uani 1.00 1 d . . .
 C(6) C 0.3558(2) 0.12038(5) 1.04753(13) 0.0228(3) Uani 1.00 1 d . . .
 C(7) C 0.2082(2) 0.14959(5) 1.11760(15) 0.0252(3) Uani 1.00 1 d . . .
 C(8) C 0.2144(3) 0.2500 1.12025(18) 0.0207(4) Uani 1.00 2 d S . .
 C(9) C 0.3225(2) 0.20224(5) 1.18079(13) 0.0222(3) Uani 1.00 1 d . . .
 C(10) C 0.5483(2) 0.20340(5) 1.30094(14) 0.0251(3) Uani 1.00 1 d . . .
 C(11) C 0.6650(3) 0.2500 1.3626(2) 0.0267(4) Uani 1.00 2 d S . .
 C(12) C 0.4260(2) 0.11548(5) 0.67430(15) 0.0300(3) Uani 1.00 1 d . . .
 C(13) C 0.4959(3) 0.17241(6) 0.65716(18) 0.0376(4) Uani 1.00 1 d . . .
 C(14) C 0.1579(2) 0.10487(7) 0.56932(16) 0.0366(4) Uani 1.00 1 d . . .
 C(15) C 0.5859(3) 0.07893(8) 0.6265(2) 0.0482(5) Uani 1.00 1 d . . .
 C(16) C 0.8715(3) 0.01955(6) 1.16101(19) 0.0380(4) Uani 1.00 1 d . . .
 C(17) C 0.9116(4) 0.2500 1.4907(2) 0.0426(6) Uani 1.00 2 d S . .
 C(18) C -0.2217(3) 0.2500 1.0194(2) 0.0357(6) Uani 1.00 2 d S . .
 H(1) H 0.741(2) 0.0510(5) 0.8833(14) 0.035(3) Uiso 1.00 1 c . . .
 H(2) H 0.547(2) 0.0754(5) 1.2304(16) 0.033(3) Uiso 1.00 1 c . . .
 H(3) H 0.205(2) 0.1285(5) 1.2007(16) 0.033(3) Uiso 1.00 1 c . . .
 H(4) H 0.033(2) 0.1537(5) 1.0446(16) 0.029(3) Uiso 1.00 1 c . . .
 H(5) H 0.629(2) 0.1696(5) 1.3432(14) 0.026(3) Uiso 1.00 1 c . . .
 H(6) H 0.466(3) 0.1786(7) 0.550(2) 0.059(5) Uiso 1.00 1 c . . .
 H(7) H 0.679(3) 0.1786(6) 0.7229(19) 0.054(4) Uiso 1.00 1 c . . .
 H(8) H 0.397(2) 0.1977(6) 0.6899(17) 0.043(4) Uiso 1.00 1 c . . .
 H(9) H 0.131(2) 0.1107(6) 0.4614(18) 0.050(4) Uiso 1.00 1 c . . .
 H(10) H 0.113(2) 0.0668(7) 0.5749(17) 0.047(4) Uiso 1.00 1 c . . .
 H(11) H 0.040(2) 0.1271(6) 0.5913(16) 0.042(4) Uiso 1.00 1 c . . .
 H(12) H 0.554(3) 0.0874(6) 0.521(2) 0.058(5) Uiso 1.00 1 c . . .
 H(13) H 0.541(3) 0.0400(8) 0.6305(18) 0.062(5) Uiso 1.00 1 c . . .
 H(14) H 0.768(3) 0.0838(6) 0.6881(19) 0.052(4) Uiso 1.00 1 c . . .
 H(15) H 0.836(3) -0.0158(7) 1.1237(17) 0.051(4) Uiso 1.00 1 c . . .
 H(16) H 1.034(3) 0.0292(7) 1.163(2) 0.066(5) Uiso 1.00 1 c . . .
 H(17) H 0.886(3) 0.0163(7) 1.265(2) 0.072(6) Uiso 1.00 1 c . . .
 H(18) H 1.038(6) 0.2500 1.459(3) 0.093(11) Uiso 1.00 2 c S . .
 H(19) H 0.944(4) 0.2806(8) 1.556(2) 0.093(7) Uiso 1.00 1 c . . .
 H(20) H -0.354(4) 0.2500 0.926(2) 0.053(7) Uiso 1.00 2 c S . .
 H(21) H -0.222(3) 0.2822(6) 1.0818(19) 0.056(5) Uiso 1.00 1 c . . .
 H(22) H 0.108(3) 0.1877(8) 0.879(2) 0.068(6) Uiso 1.00 1 c . . .


loop_
_atom_site_aniso_label
_atom_site_aniso_U_11
_atom_site_aniso_U_22
_atom_site_aniso_U_33
_atom_site_aniso_U_12
_atom_site_aniso_U_13
_atom_site_aniso_U_23
 O(1) 0.0309(5) 0.0314(5) 0.0258(5) 0.0101(4) 0.0115(4) 0.0039(4)
 O(2) 0.0204(6) 0.0336(7) 0.0209(6) 0.0000 0.0077(5) 0.0000
 C(1) 0.0207(6) 0.0193(5) 0.0247(6) -0.0005(4) 0.0076(5) 0.0006(4)
 C(2) 0.0235(6) 0.0241(6) 0.0269(6) -0.0025(5) 0.0121(5) -0.0010(5)
 C(3) 0.0253(7) 0.0248(6) 0.0353(7) 0.0008(5) 0.0140(6) -0.0026(5)
 C(4) 0.0268(7) 0.0190(6) 0.0323(7) -0.0001(5) 0.0072(5) 0.0001(5)
 C(5) 0.0341(7) 0.0197(6) 0.0237(6) -0.0029(5) 0.0090(5) 0.0000(5)
 C(6) 0.0257(6) 0.0185(5) 0.0244(6) -0.0046(4) 0.0103(5) -0.0027(4)
 C(7) 0.0298(7) 0.0227(6) 0.0257(6) -0.0038(5) 0.0138(6) -0.0013(5)
 C(8) 0.0211(9) 0.0254(8) 0.0173(8) 0.0000 0.0097(7) 0.0000
 C(9) 0.0274(6) 0.0223(6) 0.0205(6) -0.0014(5) 0.0134(5) -0.0008(4)
 C(10) 0.0309(7) 0.0216(6) 0.0225(6) 0.0021(5) 0.0103(5) 0.0022(5)
 C(11) 0.0278(10) 0.0265(9) 0.0236(9) 0.0000 0.0080(7) 0.0000
 C(12) 0.0302(7) 0.0360(7) 0.0279(7) 0.0015(5) 0.0160(5) 0.0009(5)
 C(13) 0.0348(9) 0.0444(9) 0.0368(8) -0.0026(7) 0.0177(7) 0.0101(6)
 C(14) 0.0396(9) 0.0445(9) 0.0259(7) -0.0048(7) 0.0134(6) -0.0039(6)
 C(15) 0.0556(12) 0.0592(11) 0.0421(9) 0.0139(8) 0.0326(9) 0.0024(8)
 C(16) 0.0364(9) 0.0268(7) 0.0428(9) 0.0069(6) 0.0075(7) 0.0046(6)
 C(17) 0.0392(13) 0.0337(12) 0.0371(12) 0.0000 -0.0032(10) 0.0000
 C(18) 0.0236(11) 0.0468(13) 0.0394(12) 0.0000 0.0155(10) 0.0000

#==============================================================================

_computing_data_collection            'CrystalClear'
_computing_cell_refinement            'CrystalClear'
_computing_data_reduction             'CrystalStructure'
_computing_structure_solution         'SIR92'
_computing_structure_refinement       'CRYSTALS'
_computing_publication_material       'CrystalStructure 3.8'
_computing_molecular_graphics          ?

#==============================================================================

# MOLECULAR GEOMETRY

_geom_special_details
;
    ENTER SPECIAL DETAILS OF THE MOLECULAR GEOMETRY
;

loop_
_geom_bond_atom_site_label_1
_geom_bond_atom_site_label_2
_geom_bond_distance
_geom_bond_publ_flag
_geom_bond_site_symmetry_1
_geom_bond_site_symmetry_2
O(1) C(1) 1.3821(14) yes . .
O(2) C(8) 1.4080(17) yes . .
O(2) C(18) 1.452(3) yes . .
C(1) C(2) 1.412(2) yes . .
C(1) C(6) 1.3968(18) yes . .
C(2) C(3) 1.3933(16) yes . .
C(2) C(12) 1.541(2) yes . .
C(3) C(4) 1.394(2) yes . .
C(4) C(5) 1.383(2) yes . .
C(4) C(16) 1.5091(19) yes . .
C(5) C(6) 1.3946(16) yes . .
C(6) C(7) 1.517(2) yes . .
C(7) C(9) 1.5211(17) yes . .
C(8) C(9) 1.3949(14) yes . .
C(8) C(9) 1.3949(14) yes . 4_555
C(9) C(10) 1.3914(15) yes . .
C(10) C(11) 1.3878(14) yes . .
C(11) C(17) 1.505(2) yes . .
C(12) C(13) 1.539(2) yes . .
C(12) C(14) 1.5408(18) yes . .
C(12) C(15) 1.538(2) yes . .
O(1) H(22) 0.89(2) no . .
C(3) H(1) 0.981(17) no . .
C(5) H(2) 0.987(17) no . .
C(7) H(3) 0.987(16) no . .
C(7) H(4) 1.007(13) no . .
C(10) H(5) 0.993(13) no . .
C(13) H(6) 1.01(2) no . .
C(13) H(7) 1.035(17) no . .
C(13) H(8) 1.010(19) no . .
C(14) H(9) 1.020(18) no . .
C(14) H(10) 1.015(18) no . .
C(14) H(11) 0.995(18) no . .
C(15) H(12) 1.00(2) no . .
C(15) H(13) 1.03(2) no . .
C(15) H(14) 1.019(18) no . .
C(16) H(15) 0.964(17) no . .
C(16) H(16) 0.99(2) no . .
C(16) H(17) 0.99(2) no . .
C(17) H(18) 0.93(4) no . .
C(17) H(19) 0.98(2) no . .
C(17) H(19) 0.98(2) no . 4_555
C(18) H(20) 0.94(2) no . .
C(18) H(21) 1.025(18) no . .
C(18) H(21) 1.025(18) no . 4_555

loop_
_geom_angle_atom_site_label_1
_geom_angle_atom_site_label_2
_geom_angle_atom_site_label_3
_geom_angle
_geom_angle_publ_flag
_geom_angle_site_symmetry_1
_geom_angle_site_symmetry_2
_geom_angle_site_symmetry_3
C(8) O(2) C(18) 112.96(15) yes . . .
O(1) C(1) C(2) 118.08(11) yes . . .
O(1) C(1) C(6) 120.51(12) yes . . .
C(2) C(1) C(6) 121.41(11) yes . . .
C(1) C(2) C(3) 116.56(12) yes . . .
C(1) C(2) C(12) 121.90(10) yes . . .
C(3) C(2) C(12) 121.54(13) yes . . .
C(2) C(3) C(4) 123.62(14) yes . . .
C(3) C(4) C(5) 117.57(11) yes . . .
C(3) C(4) C(16) 120.71(14) yes . . .
C(5) C(4) C(16) 121.72(14) yes . . .
C(4) C(5) C(6) 121.83(13) yes . . .
C(1) C(6) C(5) 118.84(13) yes . . .
C(1) C(6) C(7) 120.62(10) yes . . .
C(5) C(6) C(7) 120.45(12) yes . . .
C(6) C(7) C(9) 111.89(12) yes . . .
O(2) C(8) C(9) 119.14(6) yes . . .
O(2) C(8) C(9) 119.14(6) yes . . 4_555
C(9) C(8) C(9) 121.64(11) yes . . 4_555
C(7) C(9) C(8) 122.78(9) yes . . .
C(7) C(9) C(10) 119.24(10) yes . . .
C(8) C(9) C(10) 117.94(11) yes . . .
C(9) C(10) C(11) 122.32(11) yes . . .
C(10) C(11) C(10) 117.79(12) yes . . 4_555
C(10) C(11) C(17) 121.10(7) yes . . .
C(10) C(11) C(17) 121.10(7) yes 4_555 . .
C(2) C(12) C(13) 109.76(11) yes . . .
C(2) C(12) C(14) 110.44(13) yes . . .
C(2) C(12) C(15) 111.26(11) yes . . .
C(13) C(12) C(14) 110.28(11) yes . . .
C(13) C(12) C(15) 107.98(15) yes . . .
C(14) C(12) C(15) 107.06(12) yes . . .
C(1) O(1) H(22) 110.3(11) no . . .
C(2) C(3) H(1) 119.0(7) no . . .
C(4) C(3) H(1) 117.4(7) no . . .
C(4) C(5) H(2) 120.1(8) no . . .
C(6) C(5) H(2) 118.0(9) no . . .
C(6) C(7) H(3) 108.6(9) no . . .
C(6) C(7) H(4) 110.6(10) no . . .
C(9) C(7) H(3) 107.3(8) no . . .
C(9) C(7) H(4) 111.5(7) no . . .
H(3) C(7) H(4) 106.8(12) no . . .
C(9) C(10) H(5) 118.5(6) no . . .
C(11) C(10) H(5) 119.1(6) no . . .
C(12) C(13) H(6) 108.7(10) no . . .
C(12) C(13) H(7) 109.9(9) no . . .
C(12) C(13) H(8) 110.4(10) no . . .
H(6) C(13) H(7) 109.3(16) no . . .
H(6) C(13) H(8) 110.6(14) no . . .
H(7) C(13) H(8) 107.9(13) no . . .
C(12) C(14) H(9) 111.1(9) no . . .
C(12) C(14) H(10) 111.0(7) no . . .
C(12) C(14) H(11) 113.0(7) no . . .
H(9) C(14) H(10) 105.2(13) no . . .
H(9) C(14) H(11) 108.3(12) no . . .
H(10) C(14) H(11) 107.9(14) no . . .
C(12) C(15) H(12) 107.8(10) no . . .
C(12) C(15) H(13) 111.7(12) no . . .
C(12) C(15) H(14) 113.0(11) no . . .
H(12) C(15) H(13) 107.7(14) no . . .
H(12) C(15) H(14) 107.6(16) no . . .
H(13) C(15) H(14) 108.8(13) no . . .
C(4) C(16) H(15) 112.8(8) no . . .
C(4) C(16) H(16) 111.4(10) no . . .
C(4) C(16) H(17) 112.9(11) no . . .
H(15) C(16) H(16) 107.6(16) no . . .
H(15) C(16) H(17) 103.3(16) no . . .
H(16) C(16) H(17) 108.4(15) no . . .
C(11) C(17) H(18) 111.7(18) no . . .
C(11) C(17) H(19) 114.8(11) no . . .
C(11) C(17) H(19) 114.8(11) no . . 4_555
H(18) C(17) H(19) 104.3(18) no . . .
H(18) C(17) H(19) 104.3(18) no . . 4_555
H(19) C(17) H(19) 105.8(18) no . . 4_555
O(2) C(18) H(20) 106(2) no . . .
O(2) C(18) H(21) 109.8(11) no . . .
O(2) C(18) H(21) 109.8(11) no . . 4_555
H(20) C(18) H(21) 112.5(13) no . . .
H(20) C(18) H(21) 112.5(13) no . . 4_555
H(21) C(18) H(21) 106.2(15) no . . 4_555

loop_
_geom_torsion_atom_site_label_1
_geom_torsion_atom_site_label_2
_geom_torsion_atom_site_label_3
_geom_torsion_atom_site_label_4
_geom_torsion
_geom_torsion_publ_flag
_geom_torsion_site_symmetry_1
_geom_torsion_site_symmetry_2
_geom_torsion_site_symmetry_3
_geom_torsion_site_symmetry_4
C(18) O(2) C(8) C(9) 91.73(17) ? . . . .
C(18) O(2) C(8) C(9) -91.73(17) ? . . . 4_555
O(1) C(1) C(2) C(3) 176.08(11) ? . . . .
O(1) C(1) C(2) C(12) -3.51(17) ? . . . .
O(1) C(1) C(6) C(5) -176.87(11) ? . . . .
O(1) C(1) C(6) C(7) -0.32(17) ? . . . .
C(2) C(1) C(6) C(5) 3.51(18) ? . . . .
C(2) C(1) C(6) C(7) -179.94(11) ? . . . .
C(6) C(1) C(2) C(3) -4.30(18) ? . . . .
C(6) C(1) C(2) C(12) 176.11(11) ? . . . .
C(1) C(2) C(3) C(4) 1.51(19) ? . . . .
C(1) C(2) C(12) C(13) 63.88(16) ? . . . .
C(1) C(2) C(12) C(14) -57.92(16) ? . . . .
C(1) C(2) C(12) C(15) -176.66(12) ? . . . .
C(3) C(2) C(12) C(13) -115.69(14) ? . . . .
C(3) C(2) C(12) C(14) 122.51(14) ? . . . .
C(3) C(2) C(12) C(15) 3.76(17) ? . . . .
C(12) C(2) C(3) C(4) -178.90(11) ? . . . .
C(2) C(3) C(4) C(5) 2.00(19) ? . . . .
C(2) C(3) C(4) C(16) -178.65(12) ? . . . .
C(3) C(4) C(5) C(6) -2.90(19) ? . . . .
C(16) C(4) C(5) C(6) 177.76(12) ? . . . .
C(4) C(5) C(6) C(1) 0.24(18) ? . . . .
C(4) C(5) C(6) C(7) -176.32(11) ? . . . .
C(1) C(6) C(7) C(9) -81.76(13) ? . . . .
C(5) C(6) C(7) C(9) 94.73(14) ? . . . .
C(6) C(7) C(9) C(8) 111.50(16) ? . . . .
C(6) C(7) C(9) C(10) -66.25(17) ? . . . .
O(2) C(8) C(9) C(7) -3.9(2) ? . . . .
O(2) C(8) C(9) C(10) 173.92(16) ? . . . .
O(2) C(8) C(9) C(7) 3.9(2) ? . . 4_555 4_555
O(2) C(8) C(9) C(10) -173.92(16) ? . . 4_555 4_555
C(9) C(8) C(9) C(7) -179.69(16) ? . . 4_555 4_555
C(9) C(8) C(9) C(10) 2.5(2) ? . . 4_555 4_555
C(9) C(8) C(9) C(7) 179.69(16) ? 4_555 . . .
C(9) C(8) C(9) C(10) -2.5(2) ? 4_555 . . .
C(7) C(9) C(10) C(11) 178.90(17) ? . . . .
C(8) C(9) C(10) C(11) 1.0(2) ? . . . .
C(9) C(10) C(11) C(10) 0.4(2) ? . . . 4_555
C(9) C(10) C(11) C(17) -178.8(2) ? . . . .

loop_
_geom_contact_atom_site_label_1
_geom_contact_atom_site_label_2
_geom_contact_distance
_geom_contact_publ_flag
_geom_contact_site_symmetry_1
_geom_contact_site_symmetry_2
C(4) C(4) 3.5844(17) ? . 3_657
O(1) H(7) 2.683(19) ? . 1_455
O(1) H(14) 3.125(17) ? . 1_455
O(1) H(19) 2.72(2) ? . 4_454
O(1) H(20) 3.31(2) ? . 1_655
O(2) H(7) 3.137(16) ? . 1_455
O(2) H(7) 3.137(16) ? . 4_455
C(1) H(14) 3.395(17) ? . 1_455
C(1) H(15) 3.104(18) ? . 3_657
C(1) H(20) 3.509(15) ? . 1_655
C(1) H(21) 3.355(15) ? . 4_655
C(2) H(4) 3.412(14) ? . 1_655
C(2) H(15) 3.029(19) ? . 3_657
C(3) H(4) 3.058(14) ? . 1_655
C(3) H(15) 3.004(18) ? . 3_657
C(3) H(16) 3.51(2) ? . 3_757
C(4) H(3) 3.398(14) ? . 1_655
C(4) H(4) 3.312(16) ? . 1_655
C(4) H(15) 3.084(15) ? . 3_657
C(5) H(15) 3.092(15) ? . 3_657
C(5) H(16) 3.41(2) ? . 1_455
C(6) H(15) 3.117(17) ? . 3_657
C(6) H(16) 3.49(2) ? . 1_455
C(6) H(21) 3.459(17) ? . 4_655
C(7) H(16) 3.33(2) ? . 1_455
C(9) H(6) 3.44(2) ? . 1_556
C(9) H(21) 3.26(2) ? . 4_655
C(10) H(6) 2.77(2) ? . 1_556
C(10) H(21) 3.01(2) ? . 4_655
C(11) H(6) 3.15(2) ? . 1_556
C(11) H(6) 3.15(2) ? . 4_556
C(11) H(21) 3.21(2) ? . 1_655
C(11) H(21) 3.21(2) ? . 4_655
C(13) H(5) 3.491(16) ? . 1_554
C(13) H(18) 3.30(2) ? . 1_454
C(13) H(19) 3.26(2) ? . 4_454
C(13) H(19) 3.43(2) ? . 4_554
C(13) H(20) 3.14(2) ? . 1_655
C(13) H(22) 3.442(18) ? . 1_655
C(14) H(5) 3.466(12) ? . 1_454
C(14) H(12) 3.470(19) ? . 1_455
C(14) H(14) 3.04(2) ? . 1_455
C(14) H(17) 3.582(19) ? . 1_454
C(14) H(17) 3.56(2) ? . 3_657
C(14) H(19) 3.17(2) ? . 4_454
C(15) H(10) 3.399(19) ? . 1_655
C(15) H(11) 3.121(18) ? . 1_655
C(16) H(1) 3.100(16) ? . 3_757
C(16) H(3) 3.348(15) ? . 1_655
C(16) H(9) 3.589(16) ? . 1_656
C(16) H(10) 3.382(18) ? . 3_657
C(16) H(14) 3.347(17) ? . 3_757
C(17) H(6) 3.47(2) ? . 1_556
C(17) H(6) 3.47(2) ? . 4_556
C(17) H(8) 3.076(14) ? . 1_656
C(17) H(8) 3.076(14) ? . 4_656
C(17) H(11) 3.282(16) ? . 1_656
C(17) H(11) 3.282(16) ? . 4_656
C(18) H(7) 3.289(18) ? . 1_455
C(18) H(7) 3.289(18) ? . 4_455
C(18) H(8) 3.399(14) ? . 1_455
C(18) H(8) 3.399(14) ? . 4_455
H(1) C(16) 3.100(16) ? . 3_757
H(1) H(4) 3.195(19) ? . 1_655
H(1) H(15) 3.53(2) ? . 3_657
H(1) H(15) 2.71(2) ? . 3_757
H(1) H(16) 2.59(2) ? . 3_757
H(1) H(17) 3.56(2) ? . 3_757
H(2) H(9) 3.431(19) ? . 1_656
H(2) H(12) 2.86(2) ? . 1_556
H(2) H(13) 3.37(2) ? . 3_657
H(2) H(16) 3.09(2) ? . 1_455
H(3) C(4) 3.398(14) ? . 1_455
H(3) C(16) 3.348(15) ? . 1_455
H(3) H(6) 3.41(2) ? . 1_556
H(3) H(9) 2.81(2) ? . 1_556
H(3) H(12) 3.18(2) ? . 1_556
H(3) H(16) 2.70(2) ? . 1_455
H(4) C(2) 3.412(14) ? . 1_455
H(4) C(3) 3.058(14) ? . 1_455
H(4) C(4) 3.312(16) ? . 1_455
H(4) H(1) 3.195(19) ? . 1_455
H(4) H(7) 3.09(2) ? . 1_455
H(4) H(16) 3.38(2) ? . 1_455
H(5) C(13) 3.491(16) ? . 1_556
H(5) C(14) 3.466(12) ? . 1_656
H(5) H(6) 2.60(2) ? . 1_556
H(5) H(9) 3.13(2) ? . 1_656
H(5) H(11) 2.889(17) ? . 1_656
H(5) H(12) 2.88(2) ? . 1_556
H(5) H(21) 3.29(2) ? . 4_655
H(6) C(9) 3.44(2) ? . 1_554
H(6) C(10) 2.77(2) ? . 1_554
H(6) C(11) 3.15(2) ? . 1_554
H(6) C(17) 3.47(2) ? . 1_554
H(6) H(3) 3.41(2) ? . 1_554
H(6) H(5) 2.60(2) ? . 1_554
H(6) H(11) 3.54(2) ? . 1_655
H(6) H(18) 2.97(3) ? . 1_454
H(6) H(19) 3.30(3) ? . 4_454
H(6) H(19) 3.02(3) ? . 4_554
H(7) O(1) 2.683(19) ? . 1_655
H(7) O(2) 3.137(16) ? . 1_655
H(7) C(18) 3.289(18) ? . 1_655
H(7) H(4) 3.09(2) ? . 1_655
H(7) H(11) 3.21(2) ? . 1_655
H(7) H(19) 2.90(3) ? . 4_554
H(7) H(20) 2.77(3) ? . 1_655
H(7) H(21) 3.49(2) ? . 4_655
H(7) H(22) 2.41(2) ? . 1_655
H(8) C(17) 3.076(14) ? . 1_454
H(8) C(18) 3.399(14) ? . 1_655
H(8) H(18) 2.76(2) ? . 1_454
H(8) H(19) 3.26(2) ? . 1_454
H(8) H(19) 2.55(2) ? . 4_454
H(8) H(20) 2.57(2) ? . 1_655
H(9) C(16) 3.589(16) ? . 1_454
H(9) H(2) 3.431(19) ? . 1_454
H(9) H(3) 2.81(2) ? . 1_554
H(9) H(5) 3.13(2) ? . 1_454
H(9) H(16) 3.45(2) ? . 1_454
H(9) H(17) 3.07(2) ? . 1_454
H(9) H(18) 3.593(17) ? . 1_454
H(9) H(19) 3.26(2) ? . 4_454
H(10) C(15) 3.399(19) ? . 1_455
H(10) C(16) 3.382(18) ? . 3_657
H(10) H(12) 3.20(2) ? . 1_455
H(10) H(14) 2.74(3) ? . 1_455
H(10) H(15) 3.14(2) ? . 3_657
H(10) H(17) 3.08(2) ? . 1_454
H(10) H(17) 2.64(2) ? . 3_657
H(11) C(15) 3.121(18) ? . 1_455
H(11) C(17) 3.282(16) ? . 1_454
H(11) H(5) 2.889(17) ? . 1_454
H(11) H(6) 3.54(2) ? . 1_455
H(11) H(7) 3.21(2) ? . 1_455
H(11) H(12) 2.88(2) ? . 1_455
H(11) H(14) 2.45(2) ? . 1_455
H(11) H(18) 3.39(2) ? . 1_454
H(11) H(19) 2.41(2) ? . 4_454
H(12) C(14) 3.470(19) ? . 1_655
H(12) H(2) 2.86(2) ? . 1_554
H(12) H(3) 3.18(2) ? . 1_554
H(12) H(5) 2.88(2) ? . 1_554
H(12) H(10) 3.20(2) ? . 1_655
H(12) H(11) 2.88(2) ? . 1_655
H(12) H(13) 3.52(2) ? . 3_656
H(13) H(2) 3.37(2) ? . 3_657
H(13) H(12) 3.52(2) ? . 3_656
H(13) H(13) 3.16(2) ? . 3_656
H(13) H(15) 3.58(2) ? . 3_757
H(13) H(16) 3.09(2) ? . 3_757
H(13) H(17) 3.43(3) ? . 3_657
H(13) H(17) 3.46(2) ? . 3_757
H(14) O(1) 3.125(17) ? . 1_655
H(14) C(1) 3.395(17) ? . 1_655
H(14) C(14) 3.04(2) ? . 1_655
H(14) C(16) 3.347(17) ? . 3_757
H(14) H(10) 2.74(3) ? . 1_655
H(14) H(11) 2.45(2) ? . 1_655
H(14) H(15) 2.91(2) ? . 3_757
H(14) H(16) 3.23(2) ? . 3_757
H(14) H(17) 3.19(2) ? . 3_757
H(14) H(22) 3.41(2) ? . 1_655
H(15) C(1) 3.104(18) ? . 3_657
H(15) C(2) 3.029(19) ? . 3_657
H(15) C(3) 3.004(18) ? . 3_657
H(15) C(4) 3.084(15) ? . 3_657
H(15) C(5) 3.092(15) ? . 3_657
H(15) C(6) 3.117(17) ? . 3_657
H(15) H(1) 3.53(2) ? . 3_657
H(15) H(1) 2.71(2) ? . 3_757
H(15) H(10) 3.14(2) ? . 3_657
H(15) H(13) 3.58(2) ? . 3_757
H(15) H(14) 2.91(2) ? . 3_757
H(15) H(16) 3.24(3) ? . 3_757
H(16) C(3) 3.51(2) ? . 3_757
H(16) C(5) 3.41(2) ? . 1_655
H(16) C(6) 3.49(2) ? . 1_655
H(16) C(7) 3.33(2) ? . 1_655
H(16) H(1) 2.59(2) ? . 3_757
H(16) H(2) 3.09(2) ? . 1_655
H(16) H(3) 2.70(2) ? . 1_655
H(16) H(4) 3.38(2) ? . 1_655
H(16) H(9) 3.45(2) ? . 1_656
H(16) H(13) 3.09(2) ? . 3_757
H(16) H(14) 3.23(2) ? . 3_757
H(16) H(15) 3.24(3) ? . 3_757
H(16) H(16) 3.42(2) ? . 3_757
H(17) C(14) 3.582(19) ? . 1_656
H(17) C(14) 3.56(2) ? . 3_657
H(17) H(1) 3.56(2) ? . 3_757
H(17) H(9) 3.07(2) ? . 1_656
H(17) H(10) 3.08(2) ? . 1_656
H(17) H(10) 2.64(2) ? . 3_657
H(17) H(13) 3.43(3) ? . 3_657
H(17) H(13) 3.46(2) ? . 3_757
H(17) H(14) 3.19(2) ? . 3_757
H(18) C(13) 3.30(2) ? . 1_656
H(18) C(13) 3.30(2) ? . 4_656
H(18) H(6) 2.97(3) ? . 1_656
H(18) H(6) 2.97(3) ? . 4_656
H(18) H(8) 2.76(2) ? . 1_656
H(18) H(8) 2.76(2) ? . 4_656
H(18) H(9) 3.593(17) ? . 1_656
H(18) H(9) 3.593(17) ? . 4_656
H(18) H(11) 3.39(2) ? . 1_656
H(18) H(11) 3.39(2) ? . 4_656
H(18) H(21) 3.50(3) ? . 1_655
H(18) H(21) 3.50(3) ? . 4_655
H(19) O(1) 2.72(2) ? . 4_656
H(19) C(13) 3.43(2) ? . 4_556
H(19) C(13) 3.26(2) ? . 4_656
H(19) C(14) 3.17(2) ? . 4_656
H(19) H(6) 3.02(3) ? . 4_556
H(19) H(6) 3.30(3) ? . 4_656
H(19) H(7) 2.90(3) ? . 4_556
H(19) H(8) 3.26(2) ? . 1_656
H(19) H(8) 2.55(2) ? . 4_656
H(19) H(9) 3.26(2) ? . 4_656
H(19) H(11) 2.41(2) ? . 4_656
H(19) H(22) 3.04(3) ? . 4_656
H(20) O(1) 3.31(2) ? . 1_455
H(20) O(1) 3.31(2) ? . 4_455
H(20) C(1) 3.509(15) ? . 1_455
H(20) C(1) 3.509(15) ? . 4_455
H(20) C(13) 3.14(2) ? . 1_455
H(20) C(13) 3.14(2) ? . 4_455
H(20) H(7) 2.77(3) ? . 1_455
H(20) H(7) 2.77(3) ? . 4_455
H(20) H(8) 2.57(2) ? . 1_455
H(20) H(8) 2.57(2) ? . 4_455
H(20) H(22) 3.44(3) ? . 1_455
H(20) H(22) 3.44(3) ? . 4_455
H(21) C(1) 3.355(15) ? . 4_455
H(21) C(6) 3.459(17) ? . 4_455
H(21) C(9) 3.26(2) ? . 4_455
H(21) C(10) 3.01(2) ? . 4_455
H(21) C(11) 3.21(2) ? . 1_455
H(21) H(5) 3.29(2) ? . 4_455
H(21) H(7) 3.49(2) ? . 4_455
H(21) H(18) 3.50(3) ? . 1_455
H(22) C(13) 3.442(18) ? . 1_455
H(22) H(7) 2.41(2) ? . 1_455
H(22) H(14) 3.41(2) ? . 1_455
H(22) H(19) 3.04(3) ? . 4_454
H(22) H(20) 3.44(3) ? . 1_655
O(1) O(2) 3.0385(15) ? . .
O(2) H(22) 2.18(2) ? . .


#==============================================================================

# Additional structures and associated data_? identifiers
# should be added at this point if there is more than one 
# structure analysis in the CIF.

#==============================================================================

#     End of CIF

#==============================================================================
#===END
data_General
_audit_creation_date                  '2007-05-28'
_audit_creation_method                'by CrystalStructure 3.8'
_audit_update_record                   ?

#==============================================================================

# PROCESSING SUMMARY (IUCr Office Use Only)

_journal_date_recd_electronic     ?
_journal_date_from_coeditor       ?
_journal_date_accepted            ?
_journal_coeditor_code            ?

#==============================================================================

# SUBMISSION DETAILS

_publ_contact_author_name             'ENTER NAME'
_publ_contact_author_email            'ENTER EMAIL ADDRESS'
_publ_contact_author_fax              'ENTER FAX NUMBER'
_publ_contact_author_phone            'ENTER PHONE NUMBER'
_publ_contact_letter
;
    ENTER TEXT OF LETTER
;
_publ_requested_journal               'ENTER JOURNAL NAME HERE'
_publ_requested_category              'FM'
_publ_requested_coeditor_name          ?

#==============================================================================

# TITLE AND AUTHOR LIST

_publ_section_title
;
    ENTER SECTION TITLE
;
_publ_section_title_footnote
;
    ENTER FOOTNOTE TO TITLE OF PAPER
;
loop_
_publ_author_name
_publ_author_footnote
_publ_author_address
' FIRST AUTHORS NAME '
;
  FIRST AUTHORS FOOTNOTES
;
;
  FIRST AUTHORS ADDRESS
;
_publ_section_synopsis
;
  ENTER SYNOPSIS
;

#==============================================================================

# TEXT

_publ_section_abstract
;
    ENTER ABSTRACT
;
_publ_section_comment
;
    ENTER TEXT
;
_publ_section_references
;
    ENTER OTHER REFERENCES

    Rigaku/MSC and Rigaku Corporation. (2006).
    CrystalStructure (Version 3.8). 
    Single Crystal Structure Analysis Software.
    Rigaku/MSC, 9009 TX, USA 77381-5209.
    Rigaku, Tokyo 196-8666, Japan.

    Carruthers, J.R., Rollett,J.S., Betteridge, P.W.,
  Kinna, D., Pearce, L., Larsen, A., and Gabe, E.(1999)
    CRYSTALS Issue 11, Chemical Crystallography Laboratory, Oxford, UK.

;
_publ_section_figure_captions
;
    ENTER FIGURE CAPTIONS
;
_publ_section_exptl_prep
;
    ENTER COMPOUND PREPARATION DETAILS
;
_publ_section_exptl_refinement
;
    ENTER SPECIAL DETAILS OF THE REFINEMENT
;

#==============================================================================

data___[MeO2O]ZrCl2(thf)
_publ_requested_journal          Inorg.Chem.
_publ_contact_author_name        'Hiroyuki Kawaguchi'
_publ_contact_author_address     'Institute for Molecular Science'
_publ_contact_author_email       hkawa@ims.ac.p
loop_
_publ_author_name
_publ_author_address
'Matsuo, Tsukasa' 'Institute for Molecular Science'

#==============================================================================

# CHEMICAL DATA

_chemical_formula_sum            'C43 H56 Cl2 O4 Zr '
_chemical_formula_moiety         'C43 H56 Cl2 O4 Zr '
_chemical_formula_weight         799.04
_chemical_melting_point          ?

#==============================================================================

# CRYSTAL DATA
_symmetry_cell_setting           monoclinic
_symmetry_space_group_name_H-M   'P 1 21 1'
_symmetry_space_group_name_Hall  'P 2yb'
_symmetry_Int_Tables_number      4
loop_
_symmetry_equiv_pos_site_id
_symmetry_equiv_pos_as_xyz
1 +X,+Y,+Z
2 -X,1/2+Y,-Z

#------------------------------------------------------------------------------

_cell_length_a                   12.018(7)
_cell_length_b                   11.985(7)
_cell_length_c                   14.529(9)
_cell_angle_alpha                90.0000
_cell_angle_beta                 90.257(10)
_cell_angle_gamma                90.0000
_cell_volume                     2093(2)
_cell_formula_units_Z            2
_cell_measurement_reflns_used    7342
_cell_measurement_theta_min      3.3
_cell_measurement_theta_max      27.5
_cell_measurement_temperature    173.1

#------------------------------------------------------------------------------

_exptl_crystal_description       prism
_exptl_crystal_colour            colorless
_exptl_crystal_size_max          0.40
_exptl_crystal_size_mid          0.20
_exptl_crystal_size_min          0.16
_exptl_crystal_density_diffrn    1.268
_exptl_crystal_density_meas      ?
_exptl_crystal_density_method    'not measured'
_exptl_crystal_F_000             840.00
_exptl_absorpt_coefficient_mu    0.428
_exptl_absorpt_correction_type   none

#==============================================================================

# EXPERIMENTAL DATA

_diffrn_radiation_type           'Mo K\a'
_diffrn_radiation_wavelength     0.71070
_diffrn_measurement_device_type  'Rigaku Saturn'
_diffrn_measurement_method       \w
_diffrn_detector_area_resol_mean 7.31
_diffrn_reflns_number            4985
_diffrn_reflns_av_R_equivalents  ?
_diffrn_reflns_theta_max         27.48
_diffrn_measured_fraction_theta_max 0.991
_diffrn_reflns_theta_full        27.50
_diffrn_measured_fraction_theta_full 0.989
_diffrn_reflns_limit_h_min       0
_diffrn_reflns_limit_h_max       15
_diffrn_reflns_limit_k_min       0
_diffrn_reflns_limit_k_max       15
_diffrn_reflns_limit_l_min       -18
_diffrn_reflns_limit_l_max       18

#==============================================================================

# REFINEMENT DATA

_refine_special_details          
;
    Refinement was performed using all reflections. The weighted 
    R-factor (wR) and goodness of fit (S) are based on F^2^.
    R-factor (gt) are based on F. The threshold expression of
    F^2^ > 2.0 sigma(F^2^) is used only for calculating R-factor (gt).
;
_reflns_number_total             4985
_reflns_number_gt                4770
_reflns_threshold_expression     F^2^>2.0\s(F^2^)
_refine_ls_structure_factor_coef Fsqd
_refine_ls_R_factor_gt           0.0630
_refine_ls_wR_factor_ref         0.0754
_refine_ls_hydrogen_treatment    refall
_refine_ls_number_reflns         4985
_refine_ls_number_parameters     507
_refine_ls_goodness_of_fit_ref   1.038
_refine_ls_weighting_scheme      calc
_refine_ls_weighting_details     'w = 1/[3.5000\s(Fo^2^)]/(4Fo^2^)'
_refine_ls_shift/su_max          0.0000
_refine_diff_density_max         1.14
_refine_diff_density_min         -0.61
_refine_ls_extinction_method     none
_refine_ls_extinction_coef       ?
_refine_ls_abs_structure_details ?
_refine_ls_abs_structure_Flack   ?

loop_
_atom_type_symbol
_atom_type_description
_atom_type_scat_dispersion_real
_atom_type_scat_dispersion_imag
_atom_type_scat_source
C C 0.003 0.002
;
International Tables for Crystallography
(1992, Vol. C, Tables 4.2.6.8 and 6.1.1.4)
;
H H 0.000 0.000
;
International Tables for Crystallography
(1992, Vol. C, Table 6.1.1.4)
;
O O 0.011 0.006
;
International Tables for Crystallography
(1992, Vol. C, Tables 4.2.6.8 and 6.1.1.4)
;
Cl Cl 0.148 0.159
;
International Tables for Crystallography
(1992, Vol. C, Tables 4.2.6.8 and 6.1.1.4)
;
Zr Zr -2.967 0.560
;
International Tables for Crystallography
(1992, Vol. C, Tables 4.2.6.8 and 6.1.1.4)
;

#==============================================================================

# ATOMIC COORDINATES AND THERMAL PARAMETERS

loop_
_atom_site_label
_atom_site_type_symbol
_atom_site_fract_x
_atom_site_fract_y
_atom_site_fract_z
_atom_site_U_iso_or_equiv
_atom_site_adp_type
_atom_site_occupancy
_atom_site_symmetry_multiplicity
_atom_site_calc_flag
_atom_site_refinement_flags
_atom_site_disorder_assembly
_atom_site_disorder_group
Zr(1) Zr 0.04792(4) 0.45314(8) 0.84875(3) 0.02943(12) Uani 1.00 1 d . . .
Cl(1) Cl 0.19204(11) 0.31361(13) 0.86749(9) 0.0392(4) Uani 1.00 1 d . . .
Cl(2) Cl -0.05016(11) 0.38083(14) 0.98714(9) 0.0430(4) Uani 1.00 1 d . . .
O(1) O 0.1206(2) 0.5555(2) 0.7616(2) 0.0279(9) Uani 1.00 1 d . . .
O(2) O -0.0723(2) 0.5938(2) 0.8734(2) 0.0303(9) Uani 1.00 1 d . . .
O(3) O -0.0564(2) 0.3752(2) 0.7682(2) 0.0287(9) Uani 1.00 1 d . . .
O(4) O 0.1459(2) 0.5503(3) 0.9577(2) 0.0384(11) Uani 1.00 1 d . . .
C(1) C 0.1642(4) 0.6367(4) 0.7057(3) 0.0299(14) Uani 1.00 1 d . . .
C(2) C 0.2595(4) 0.6175(4) 0.6517(3) 0.0305(14) Uani 1.00 1 d . . .
C(3) C 0.2942(4) 0.7040(4) 0.5952(3) 0.0376(16) Uani 1.00 1 d . . .
C(4) C 0.2436(4) 0.8068(4) 0.5888(3) 0.0441(18) Uani 1.00 1 d . . .
C(5) C 0.1512(4) 0.8234(4) 0.6451(3) 0.0376(16) Uani 1.00 1 d . . .
C(6) C 0.1111(4) 0.7419(4) 0.7035(3) 0.0310(15) Uani 1.00 1 d . . .
C(7) C 0.0145(3) 0.7705(4) 0.7655(3) 0.0335(15) Uani 1.00 1 d . . .
C(8) C -0.1326(4) 0.6247(4) 0.7934(3) 0.0291(15) Uani 1.00 1 d . . .
C(9) C -0.0926(4) 0.7122(4) 0.7408(3) 0.0314(15) Uani 1.00 1 d . . .
C(10) C -0.1550(4) 0.7405(4) 0.6644(3) 0.0385(17) Uani 1.00 1 d . . .
C(11) C -0.2512(4) 0.6852(5) 0.6402(4) 0.0434(18) Uani 1.00 1 d . . .
C(12) C -0.2872(4) 0.5947(4) 0.6934(3) 0.0383(16) Uani 1.00 1 d . . .
C(13) C -0.2271(4) 0.5628(4) 0.7722(3) 0.0303(16) Uani 1.00 1 d . . .
C(14) C -0.2634(3) 0.4629(4) 0.8273(2) 0.0316(13) Uani 1.00 1 d . . .
C(15) C -0.1512(4) 0.3191(4) 0.7403(3) 0.0300(14) Uani 1.00 1 d . . .
C(16) C -0.2525(4) 0.3570(4) 0.7714(3) 0.0285(15) Uani 1.00 1 d . . .
C(17) C -0.3510(4) 0.3006(4) 0.7491(3) 0.0374(16) Uani 1.00 1 d . . .
C(18) C -0.3482(4) 0.2050(4) 0.6951(3) 0.0409(17) Uani 1.00 1 d . . .
C(19) C -0.2466(4) 0.1724(4) 0.6617(3) 0.0393(17) Uani 1.00 1 d . . .
C(20) C -0.1461(4) 0.2254(4) 0.6795(3) 0.0337(16) Uani 1.00 1 d . . .
C(21) C 0.3259(4) 0.5094(4) 0.6566(3) 0.0373(16) Uani 1.00 1 d . . .
C(22) C 0.2527(4) 0.4081(4) 0.6345(3) 0.0462(18) Uani 1.00 1 d . . .
C(23) C 0.3762(3) 0.4970(4) 0.7531(3) 0.0454(17) Uani 1.00 1 d . . .
C(24) C 0.4224(4) 0.5067(4) 0.5886(3) 0.054(2) Uani 1.00 1 d . . .
C(25) C 0.2829(4) 0.8981(5) 0.5244(3) 0.064(2) Uani 1.00 1 d . . .
C(26) C -0.3196(4) 0.7198(5) 0.5559(4) 0.076(2) Uani 1.00 1 d . . .
C(27) C -0.0384(4) 0.1856(5) 0.6355(4) 0.0441(18) Uani 1.00 1 d . . .
C(28) C -0.0576(4) 0.0893(5) 0.5663(4) 0.064(2) Uani 1.00 1 d . . .
C(29) C 0.0445(4) 0.1439(5) 0.7085(4) 0.070(2) Uani 1.00 1 d . . .
C(30) C 0.0109(4) 0.2807(5) 0.5795(3) 0.060(2) Uani 1.00 1 d . . .
C(31) C -0.4549(4) 0.1413(5) 0.6735(4) 0.064(2) Uani 1.00 1 d . . .
C(32) C -0.1121(4) 0.6469(4) 0.9573(3) 0.0421(17) Uani 1.00 1 d . . .
C(33) C 0.1749(5) 0.5070(5) 1.0498(3) 0.065(2) Uani 1.00 1 d . . .
C(34) C 0.2506(6) 0.5913(6) 1.0913(4) 0.086(2) Uani 1.00 1 d . . .
C(35) C 0.2985(6) 0.6546(6) 1.0144(4) 0.090(3) Uani 1.00 1 d . . .
C(36) C 0.2150(4) 0.6491(4) 0.9398(4) 0.0494(19) Uani 1.00 1 d . . .
C(37) C 0.6076(5) 0.4221(6) 1.1318(5) 0.071(2) Uani 1.00 1 d . . .
C(38) C 0.5599(6) 0.4461(9) 1.0467(5) 0.097(3) Uani 1.00 1 d . . .
C(39) C 0.4718(8) 0.3776(10) 1.0179(7) 0.133(5) Uani 1.00 1 d . . .
C(40) C 0.4273(10) 0.2965(9) 1.0758(12) 0.167(7) Uani 1.00 1 d . . .
C(41) C 0.4746(9) 0.2771(11) 1.1572(11) 0.197(7) Uani 1.00 1 d . . .
C(42) C 0.5640(7) 0.3432(7) 1.1830(6) 0.112(4) Uani 1.00 1 d . . .
C(43) C 0.7034(5) 0.4919(6) 1.1649(5) 0.118(3) Uani 1.00 1 d . . .
H(1) H 0.3593 0.6909 0.5575 0.045 Uiso 1.00 1 c R . .
H(2) H 0.1141 0.8952 0.6434 0.045 Uiso 1.00 1 c R . .
H(3) H 0.0351 0.7506 0.8280 0.040 Uiso 1.00 1 c R . .
H(4) H 0.0016 0.8503 0.7619 0.040 Uiso 1.00 1 c R . .
H(5) H -0.1309 0.8027 0.6267 0.046 Uiso 1.00 1 c R . .
H(6) H -0.3533 0.5533 0.6760 0.046 Uiso 1.00 1 c R . .
H(7) H -0.2166 0.4575 0.8817 0.038 Uiso 1.00 1 c R . .
H(8) H -0.3403 0.4726 0.8456 0.038 Uiso 1.00 1 c R . .
H(9) H -0.4217 0.3281 0.7718 0.045 Uiso 1.00 1 c R . .
H(10) H -0.2447 0.1068 0.6225 0.047 Uiso 1.00 1 c R . .
H(11) H 0.1896 0.4071 0.6760 0.055 Uiso 1.00 1 c R . .
H(12) H 0.2263 0.4141 0.5715 0.055 Uiso 1.00 1 c R . .
H(13) H 0.2950 0.3396 0.6417 0.055 Uiso 1.00 1 c R . .
H(14) H 0.3170 0.4974 0.7983 0.054 Uiso 1.00 1 c R . .
H(15) H 0.4169 0.4273 0.7573 0.054 Uiso 1.00 1 c R . .
H(16) H 0.4263 0.5588 0.7650 0.054 Uiso 1.00 1 c R . .
H(17) H 0.4635 0.4377 0.5967 0.065 Uiso 1.00 1 c R . .
H(18) H 0.3949 0.5113 0.5259 0.065 Uiso 1.00 1 c R . .
H(19) H 0.4710 0.5695 0.6011 0.065 Uiso 1.00 1 c R . .
H(20) H 0.3475 0.8724 0.4907 0.077 Uiso 1.00 1 c R . .
H(21) H 0.2240 0.9171 0.4813 0.077 Uiso 1.00 1 c R . .
H(22) H 0.3026 0.9635 0.5602 0.077 Uiso 1.00 1 c R . .
H(23) H -0.3435 0.7970 0.5601 0.091 Uiso 1.00 1 c R . .
H(24) H -0.2717 0.7108 0.5029 0.091 Uiso 1.00 1 c R . .
H(25) H -0.3842 0.6719 0.5493 0.091 Uiso 1.00 1 c R . .
H(26) H 0.0799 0.2568 0.5514 0.072 Uiso 1.00 1 c R . .
H(27) H -0.0417 0.3022 0.5318 0.072 Uiso 1.00 1 c R . .
H(28) H 0.0252 0.3440 0.6195 0.072 Uiso 1.00 1 c R . .
H(29) H -0.0891 0.0255 0.5979 0.076 Uiso 1.00 1 c R . .
H(30) H -0.1079 0.1133 0.5179 0.076 Uiso 1.00 1 c R . .
H(31) H 0.0134 0.0686 0.5397 0.076 Uiso 1.00 1 c R . .
H(32) H 0.0114 0.0825 0.7422 0.084 Uiso 1.00 1 c R . .
H(33) H 0.1132 0.1191 0.6801 0.084 Uiso 1.00 1 c R . .
H(34) H 0.0603 0.2049 0.7504 0.084 Uiso 1.00 1 c R . .
H(35) H -0.5177 0.1777 0.7026 0.076 Uiso 1.00 1 c R . .
H(36) H -0.4669 0.1386 0.6075 0.076 Uiso 1.00 1 c R . .
H(37) H -0.4475 0.0660 0.6973 0.076 Uiso 1.00 1 c R . .
H(38) H -0.0671 0.6235 1.0095 0.051 Uiso 1.00 1 c R . .
H(39) H -0.1068 0.7272 0.9502 0.051 Uiso 1.00 1 c R . .
H(40) H -0.1890 0.6261 0.9676 0.051 Uiso 1.00 1 c R . .
H(41) H 0.1088 0.4965 1.0870 0.078 Uiso 1.00 1 c R . .
H(42) H 0.2140 0.4366 1.0440 0.078 Uiso 1.00 1 c R . .
H(43) H 0.2077 0.6415 1.1295 0.103 Uiso 1.00 1 c R . .
H(44) H 0.3086 0.5566 1.1280 0.103 Uiso 1.00 1 c R . .
H(45) H 0.3141 0.7312 1.0319 0.108 Uiso 1.00 1 c R . .
H(46) H 0.3667 0.6188 0.9947 0.108 Uiso 1.00 1 c R . .
H(47) H 0.2509 0.6429 0.8804 0.059 Uiso 1.00 1 c R . .
H(48) H 0.1695 0.7159 0.9410 0.059 Uiso 1.00 1 c R . .
H(49) H 0.5876 0.5103 1.0131 0.117 Uiso 1.00 1 c R . .
H(50) H 0.4449 0.3887 0.9556 0.160 Uiso 1.00 1 c R . .
H(51) H 0.3662 0.2533 1.0505 0.200 Uiso 1.00 1 c R . .
H(52) H 0.4403 0.2234 1.1983 0.237 Uiso 1.00 1 c R . .
H(53) H 0.5983 0.3309 1.2427 0.135 Uiso 1.00 1 c R . .
H(54) H 0.7272 0.4636 1.2243 0.141 Uiso 1.00 1 c R . .
H(55) H 0.7644 0.4869 1.1216 0.141 Uiso 1.00 1 c R . .
H(56) H 0.6807 0.5692 1.1711 0.141 Uiso 1.00 1 c R . .


loop_
_atom_site_aniso_label
_atom_site_aniso_U_11
_atom_site_aniso_U_22
_atom_site_aniso_U_33
_atom_site_aniso_U_12
_atom_site_aniso_U_13
_atom_site_aniso_U_23
Zr(1) 0.0331(2) 0.0269(2) 0.0283(2) 0.0006(2) 0.00079(19) 0.0005(2)
Cl(1) 0.0405(8) 0.0351(8) 0.0420(8) 0.0066(6) -0.0018(6) 0.0024(6)
Cl(2) 0.0461(8) 0.0451(8) 0.0377(7) 0.0028(7) 0.0084(6) 0.0130(7)
O(1) 0.0305(19) 0.0247(19) 0.0284(19) 0.0010(15) 0.0068(15) -0.0009(15)
O(2) 0.036(2) 0.0249(19) 0.0301(19) 0.0032(16) 0.0094(16) -0.0030(16)
O(3) 0.0298(18) 0.0279(19) 0.0286(19) 0.0022(16) -0.0004(15) -0.0017(16)
O(4) 0.048(2) 0.033(2) 0.034(2) -0.0047(19) -0.0086(18) -0.0047(18)
C(1) 0.031(2) 0.032(3) 0.027(2) -0.008(2) 0.000(2) -0.006(2)
C(2) 0.028(2) 0.030(3) 0.034(3) -0.005(2) 0.004(2) -0.003(2)
C(3) 0.033(3) 0.042(3) 0.038(3) -0.010(2) 0.007(2) -0.005(2)
C(4) 0.066(4) 0.031(3) 0.035(3) -0.009(3) -0.009(3) 0.007(2)
C(5) 0.039(3) 0.033(3) 0.041(3) -0.001(2) -0.001(2) 0.006(2)
C(6) 0.029(3) 0.030(3) 0.033(3) -0.005(2) 0.001(2) 0.001(2)
C(7) 0.032(3) 0.021(2) 0.048(3) 0.004(2) 0.002(2) 0.006(2)
C(8) 0.028(2) 0.026(2) 0.033(3) 0.008(2) 0.006(2) 0.003(2)
C(9) 0.034(3) 0.023(2) 0.038(3) 0.008(2) 0.003(2) 0.002(2)
C(10) 0.034(3) 0.034(3) 0.048(3) -0.003(2) 0.006(2) 0.011(2)
C(11) 0.038(3) 0.054(4) 0.039(3) 0.005(3) -0.003(2) 0.022(3)
C(12) 0.035(3) 0.038(3) 0.041(3) 0.001(2) -0.001(2) 0.010(2)
C(13) 0.031(3) 0.029(3) 0.031(3) 0.007(2) 0.007(2) 0.004(2)
C(14) 0.027(2) 0.033(2) 0.036(2) 0.005(3) 0.006(2) 0.001(3)
C(15) 0.033(3) 0.027(2) 0.030(2) -0.003(2) -0.002(2) 0.006(2)
C(16) 0.029(3) 0.028(3) 0.029(3) 0.001(2) 0.002(2) 0.008(2)
C(17) 0.033(3) 0.039(3) 0.039(3) -0.003(2) 0.002(2) 0.005(2)
C(18) 0.043(3) 0.039(3) 0.041(3) -0.004(2) -0.001(2) -0.002(2)
C(19) 0.044(3) 0.034(3) 0.040(3) -0.005(2) -0.005(2) -0.005(2)
C(20) 0.041(3) 0.024(3) 0.037(3) 0.002(2) 0.001(2) 0.002(2)
C(21) 0.030(3) 0.044(3) 0.039(3) 0.001(2) 0.010(2) -0.004(2)
C(22) 0.044(3) 0.049(3) 0.045(3) 0.011(3) 0.008(2) -0.011(2)
C(23) 0.031(3) 0.046(3) 0.059(3) 0.002(2) -0.002(2) -0.004(3)
C(24) 0.042(3) 0.055(4) 0.066(4) 0.002(3) 0.017(3) -0.001(3)
C(25) 0.077(4) 0.052(4) 0.064(4) -0.019(3) 0.020(3) 0.018(3)
C(26) 0.060(4) 0.083(5) 0.084(5) -0.017(4) -0.031(4) 0.050(4)
C(27) 0.043(3) 0.042(3) 0.047(3) -0.001(3) -0.011(3) -0.015(3)
C(28) 0.048(3) 0.066(4) 0.077(4) 0.012(3) -0.015(3) -0.041(4)
C(29) 0.066(4) 0.062(5) 0.081(5) 0.033(4) -0.023(4) -0.032(4)
C(30) 0.045(3) 0.091(5) 0.044(3) 0.003(3) 0.005(3) -0.026(3)
C(31) 0.051(3) 0.070(5) 0.070(4) -0.013(3) -0.010(3) -0.022(3)
C(32) 0.047(3) 0.041(3) 0.038(3) -0.005(3) 0.008(2) -0.015(2)
C(33) 0.089(5) 0.074(5) 0.032(3) -0.013(4) -0.023(3) 0.004(3)
C(34) 0.110(6) 0.092(6) 0.055(4) -0.023(5) -0.034(4) -0.019(4)
C(35) 0.099(6) 0.089(6) 0.081(5) -0.042(5) -0.045(4) 0.020(5)
C(36) 0.047(3) 0.045(3) 0.056(4) -0.008(3) -0.009(3) -0.009(3)
C(37) 0.062(4) 0.067(6) 0.083(5) 0.003(3) 0.014(4) 0.022(4)
C(38) 0.090(5) 0.131(7) 0.071(5) 0.058(7) 0.020(4) 0.029(7)
C(39) 0.090(8) 0.169(12) 0.141(10) 0.051(7) -0.049(7) -0.073(9)
C(40) 0.079(8) 0.074(8) 0.35(2) 0.004(6) 0.007(11) -0.018(11)
C(41) 0.081(9) 0.134(11) 0.38(2) 0.003(8) -0.002(11) 0.144(13)
C(42) 0.104(7) 0.111(8) 0.121(8) -0.014(6) -0.007(6) 0.057(6)
C(43) 0.086(6) 0.112(8) 0.156(8) -0.024(5) 0.010(5) -0.015(6)

#==============================================================================

_computing_data_collection       CrystalClear
_computing_cell_refinement       CrystalClear
_computing_data_reduction        CrystalStructure
_computing_structure_solution    SIR97
_computing_structure_refinement  CRYSTALS
_computing_publication_material  'CrystalStructure 3.8'
_computing_molecular_graphics    ?

#==============================================================================

# MOLECULAR GEOMETRY

_geom_special_details            
;
    ENTER SPECIAL DETAILS OF THE MOLECULAR GEOMETRY
;

loop_
_geom_bond_atom_site_label_1
_geom_bond_atom_site_label_2
_geom_bond_distance
_geom_bond_publ_flag
_geom_bond_site_symmetry_1
_geom_bond_site_symmetry_2
Zr(1) Cl(1) 2.4220(16) yes . .
Zr(1) Cl(2) 2.4909(14) yes . .
Zr(1) O(1) 1.970(3) yes . .
Zr(1) O(2) 2.250(3) yes . .
Zr(1) O(3) 1.950(3) yes . .
Zr(1) O(4) 2.287(3) yes . .
O(1) C(1) 1.372(5) yes . .
O(2) C(8) 1.415(6) yes . .
O(2) C(32) 1.458(5) yes . .
O(3) C(15) 1.382(5) yes . .
O(4) C(33) 1.477(6) yes . .
O(4) C(36) 1.470(6) yes . .
C(1) C(2) 1.410(6) yes . .
C(1) C(6) 1.414(7) yes . .
C(2) C(3) 1.388(7) yes . .
C(2) C(21) 1.523(7) yes . .
C(3) C(4) 1.377(7) yes . .
C(4) C(5) 1.397(7) yes . .
C(4) C(25) 1.516(8) yes . .
C(5) C(6) 1.381(7) yes . .
C(6) C(7) 1.513(7) yes . .
C(7) C(9) 1.507(6) yes . .
C(8) C(9) 1.386(7) yes . .
C(8) C(13) 1.390(7) yes . .
C(9) C(10) 1.378(7) yes . .
C(10) C(11) 1.377(7) yes . .
C(11) C(12) 1.401(8) yes . .
C(11) C(26) 1.529(8) yes . .
C(12) C(13) 1.403(7) yes . .
C(13) C(14) 1.506(7) yes . .
C(14) C(16) 1.513(7) yes . .
C(15) C(16) 1.378(7) yes . .
C(15) C(20) 1.431(7) yes . .
C(16) C(17) 1.399(7) yes . .
C(17) C(18) 1.390(7) yes . .
C(18) C(19) 1.372(7) yes . .
C(18) C(31) 1.524(7) yes . .
C(19) C(20) 1.388(7) yes . .
C(20) C(27) 1.523(7) yes . .
C(21) C(22) 1.533(7) yes . .
C(21) C(23) 1.532(7) yes . .
C(21) C(24) 1.526(7) yes . .
C(27) C(28) 1.547(8) yes . .
C(27) C(29) 1.535(8) yes . .
C(27) C(30) 1.522(8) yes . .
C(33) C(34) 1.485(9) yes . .
C(34) C(35) 1.470(10) yes . .
C(35) C(36) 1.475(9) yes . .
C(37) C(38) 1.390(10) yes . .
C(37) C(42) 1.313(11) yes . .
C(37) C(43) 1.500(10) yes . .
C(38) C(39) 1.402(14) yes . .
C(39) C(40) 1.393(18) yes . .
C(40) C(41) 1.33(2) yes . .
C(41) C(42) 1.385(15) yes . .

loop_
_geom_angle_atom_site_label_1
_geom_angle_atom_site_label_2
_geom_angle_atom_site_label_3
_geom_angle
_geom_angle_publ_flag
_geom_angle_site_symmetry_1
_geom_angle_site_symmetry_2
_geom_angle_site_symmetry_3
Cl(1) Zr(1) Cl(2) 90.56(5) yes . . .
Cl(1) Zr(1) O(1) 100.56(9) yes . . .
Cl(1) Zr(1) O(2) 163.52(9) yes . . .
Cl(1) Zr(1) O(3) 101.20(10) yes . . .
Cl(1) Zr(1) O(4) 84.74(9) yes . . .
Cl(2) Zr(1) O(1) 161.50(10) yes . . .
Cl(2) Zr(1) O(2) 79.96(9) yes . . .
Cl(2) Zr(1) O(3) 90.73(9) yes . . .
Cl(2) Zr(1) O(4) 82.10(9) yes . . .
O(1) Zr(1) O(2) 85.57(12) yes . . .
O(1) Zr(1) O(3) 101.41(12) yes . . .
O(1) Zr(1) O(4) 84.24(12) yes . . .
O(2) Zr(1) O(3) 92.44(12) yes . . .
O(2) Zr(1) O(4) 80.64(12) yes . . .
O(3) Zr(1) O(4) 170.78(12) yes . . .
Zr(1) O(1) C(1) 173.2(3) yes . . .
Zr(1) O(2) C(8) 113.1(2) yes . . .
Zr(1) O(2) C(32) 132.3(2) yes . . .
C(8) O(2) C(32) 113.8(3) yes . . .
Zr(1) O(3) C(15) 159.4(2) yes . . .
Zr(1) O(4) C(33) 124.6(3) yes . . .
Zr(1) O(4) C(36) 125.3(2) yes . . .
C(33) O(4) C(36) 108.2(3) yes . . .
O(1) C(1) C(2) 121.8(4) yes . . .
O(1) C(1) C(6) 118.2(4) yes . . .
C(2) C(1) C(6) 120.0(4) yes . . .
C(1) C(2) C(3) 117.0(4) yes . . .
C(1) C(2) C(21) 122.7(4) yes . . .
C(3) C(2) C(21) 120.3(4) yes . . .
C(2) C(3) C(4) 125.1(4) yes . . .
C(3) C(4) C(5) 116.0(4) yes . . .
C(3) C(4) C(25) 123.3(5) yes . . .
C(5) C(4) C(25) 120.6(4) yes . . .
C(4) C(5) C(6) 122.7(4) yes . . .
C(1) C(6) C(5) 119.1(4) yes . . .
C(1) C(6) C(7) 122.4(4) yes . . .
C(5) C(6) C(7) 118.5(4) yes . . .
C(6) C(7) C(9) 114.2(4) yes . . .
O(2) C(8) C(9) 118.3(4) yes . . .
O(2) C(8) C(13) 117.2(4) yes . . .
C(9) C(8) C(13) 124.5(4) yes . . .
C(7) C(9) C(8) 121.2(4) yes . . .
C(7) C(9) C(10) 122.6(4) yes . . .
C(8) C(9) C(10) 116.2(4) yes . . .
C(9) C(10) C(11) 122.7(5) yes . . .
C(10) C(11) C(12) 119.5(5) yes . . .
C(10) C(11) C(26) 121.4(5) yes . . .
C(12) C(11) C(26) 119.1(5) yes . . .
C(11) C(12) C(13) 120.1(4) yes . . .
C(8) C(13) C(12) 116.9(4) yes . . .
C(8) C(13) C(14) 123.0(4) yes . . .
C(12) C(13) C(14) 120.1(4) yes . . .
C(13) C(14) C(16) 110.9(3) yes . . .
O(3) C(15) C(16) 118.2(4) yes . . .
O(3) C(15) C(20) 121.7(4) yes . . .
C(16) C(15) C(20) 120.1(4) yes . . .
C(14) C(16) C(15) 122.1(4) yes . . .
C(14) C(16) C(17) 117.0(4) yes . . .
C(15) C(16) C(17) 120.9(4) yes . . .
C(16) C(17) C(18) 120.4(4) yes . . .
C(17) C(18) C(19) 117.3(5) yes . . .
C(17) C(18) C(31) 120.4(4) yes . . .
C(19) C(18) C(31) 122.2(5) yes . . .
C(18) C(19) C(20) 125.3(5) yes . . .
C(15) C(20) C(19) 115.8(4) yes . . .
C(15) C(20) C(27) 122.9(4) yes . . .
C(19) C(20) C(27) 121.3(4) yes . . .
C(2) C(21) C(22) 111.4(4) yes . . .
C(2) C(21) C(23) 109.2(4) yes . . .
C(2) C(21) C(24) 112.8(4) yes . . .
C(22) C(21) C(23) 109.8(4) yes . . .
C(22) C(21) C(24) 106.5(4) yes . . .
C(23) C(21) C(24) 107.0(4) yes . . .
C(20) C(27) C(28) 112.4(4) yes . . .
C(20) C(27) C(29) 111.3(4) yes . . .
C(20) C(27) C(30) 108.8(4) yes . . .
C(28) C(27) C(29) 107.5(4) yes . . .
C(28) C(27) C(30) 105.6(4) yes . . .
C(29) C(27) C(30) 111.1(4) yes . . .
O(4) C(33) C(34) 105.7(4) yes . . .
C(33) C(34) C(35) 106.5(5) yes . . .
C(34) C(35) C(36) 105.5(5) yes . . .
O(4) C(36) C(35) 106.8(4) yes . . .
C(38) C(37) C(42) 119.3(7) yes . . .
C(38) C(37) C(43) 118.8(7) yes . . .
C(42) C(37) C(43) 121.8(7) yes . . .
C(37) C(38) C(39) 116.8(8) yes . . .
C(38) C(39) C(40) 121.3(10) yes . . .
C(39) C(40) C(41) 119.7(11) yes . . .
C(40) C(41) C(42) 117.9(12) yes . . .
C(37) C(42) C(41) 124.7(10) yes . . .

loop_
_geom_torsion_atom_site_label_1
_geom_torsion_atom_site_label_2
_geom_torsion_atom_site_label_3
_geom_torsion_atom_site_label_4
_geom_torsion
_geom_torsion_publ_flag
_geom_torsion_site_symmetry_1
_geom_torsion_site_symmetry_2
_geom_torsion_site_symmetry_3
_geom_torsion_site_symmetry_4
Cl(1) Zr(1) O(1) C(1) -149(2) ? . . . .
Cl(1) Zr(1) O(2) C(8) 174.5(2) ? . . . .
Cl(1) Zr(1) O(2) C(32) -16.5(6) ? . . . .
Cl(1) Zr(1) O(3) C(15) 107.5(8) ? . . . .
Cl(1) Zr(1) O(4) C(33) -56.0(3) ? . . . .
Cl(1) Zr(1) O(4) C(36) 106.0(3) ? . . . .
Cl(2) Zr(1) O(1) C(1) -23(2) ? . . . .
Cl(2) Zr(1) O(2) C(8) -129.8(2) ? . . . .
Cl(2) Zr(1) O(2) C(32) 39.3(3) ? . . . .
Cl(2) Zr(1) O(3) C(15) 16.7(8) ? . . . .
Cl(2) Zr(1) O(4) C(33) 35.3(3) ? . . . .
Cl(2) Zr(1) O(4) C(36) -162.7(3) ? . . . .
O(1) Zr(1) O(2) C(8) 61.8(2) ? . . . .
O(1) Zr(1) O(2) C(32) -129.2(3) ? . . . .
O(2) Zr(1) O(1) C(1) 16(2) ? . . . .
O(1) Zr(1) O(3) C(15) -149.2(8) ? . . . .
O(3) Zr(1) O(1) C(1) 107(2) ? . . . .
O(1) Zr(1) O(4) C(33) -157.2(3) ? . . . .
O(1) Zr(1) O(4) C(36) 4.8(3) ? . . . .
O(4) Zr(1) O(1) C(1) -65(2) ? . . . .
O(2) Zr(1) O(3) C(15) -63.2(8) ? . . . .
O(3) Zr(1) O(2) C(8) -39.5(2) ? . . . .
O(3) Zr(1) O(2) C(32) 129.6(3) ? . . . .
O(2) Zr(1) O(4) C(33) 116.3(3) ? . . . .
O(2) Zr(1) O(4) C(36) -81.6(3) ? . . . .
O(4) Zr(1) O(2) C(8) 146.7(3) ? . . . .
O(4) Zr(1) O(2) C(32) -44.3(3) ? . . . .
O(3) Zr(1) O(4) C(33) 74.5(9) ? . . . .
O(3) Zr(1) O(4) C(36) -123.5(8) ? . . . .
O(4) Zr(1) O(3) C(15) -22.1(14) ? . . . .
Zr(1) O(1) C(1) C(2) 165(2) ? . . . .
Zr(1) O(1) C(1) C(6) -15(2) ? . . . .
Zr(1) O(2) C(8) C(9) -94.8(4) ? . . . .
Zr(1) O(2) C(8) C(13) 83.7(4) ? . . . .
C(32) O(2) C(8) C(9) 94.0(5) ? . . . .
C(32) O(2) C(8) C(13) -87.5(5) ? . . . .
Zr(1) O(3) C(15) C(16) 42.1(11) ? . . . .
Zr(1) O(3) C(15) C(20) -139.0(7) ? . . . .
Zr(1) O(4) C(33) C(34) 172.5(3) ? . . . .
Zr(1) O(4) C(36) C(35) -155.4(3) ? . . . .
C(33) O(4) C(36) C(35) 9.1(5) ? . . . .
C(36) O(4) C(33) C(34) 7.8(5) ? . . . .
O(1) C(1) C(2) C(3) 177.7(4) ? . . . .
O(1) C(1) C(2) C(21) -4.7(7) ? . . . .
O(1) C(1) C(6) C(5) -177.6(4) ? . . . .
O(1) C(1) C(6) C(7) 4.9(7) ? . . . .
C(2) C(1) C(6) C(5) 2.6(7) ? . . . .
C(2) C(1) C(6) C(7) -174.9(4) ? . . . .
C(6) C(1) C(2) C(3) -2.5(7) ? . . . .
C(6) C(1) C(2) C(21) 175.1(4) ? . . . .
C(1) C(2) C(3) C(4) 0.8(7) ? . . . .
C(1) C(2) C(21) C(22) 57.8(6) ? . . . .
C(1) C(2) C(21) C(23) -63.6(6) ? . . . .
C(1) C(2) C(21) C(24) 177.5(4) ? . . . .
C(3) C(2) C(21) C(22) -124.7(5) ? . . . .
C(3) C(2) C(21) C(23) 113.9(5) ? . . . .
C(3) C(2) C(21) C(24) -5.0(6) ? . . . .
C(21) C(2) C(3) C(4) -176.8(5) ? . . . .
C(2) C(3) C(4) C(5) 0.8(8) ? . . . .
C(2) C(3) C(4) C(25) -178.6(5) ? . . . .
C(3) C(4) C(5) C(6) -0.7(7) ? . . . .
C(25) C(4) C(5) C(6) 178.7(4) ? . . . .
C(4) C(5) C(6) C(1) -1.0(7) ? . . . .
C(4) C(5) C(6) C(7) 176.6(4) ? . . . .
C(1) C(6) C(7) C(9) -71.6(6) ? . . . .
C(5) C(6) C(7) C(9) 110.9(5) ? . . . .
C(6) C(7) C(9) C(8) 106.0(5) ? . . . .
C(6) C(7) C(9) C(10) -72.7(6) ? . . . .
O(2) C(8) C(9) C(7) 2.2(7) ? . . . .
O(2) C(8) C(9) C(10) -179.1(4) ? . . . .
O(2) C(8) C(13) C(12) 179.3(4) ? . . . .
O(2) C(8) C(13) C(14) -3.0(7) ? . . . .
C(9) C(8) C(13) C(12) -2.3(8) ? . . . .
C(9) C(8) C(13) C(14) 175.4(4) ? . . . .
C(13) C(8) C(9) C(7) -176.2(4) ? . . . .
C(13) C(8) C(9) C(10) 2.6(7) ? . . . .
C(7) C(9) C(10) C(11) 178.1(5) ? . . . .
C(8) C(9) C(10) C(11) -0.6(7) ? . . . .
C(9) C(10) C(11) C(12) -1.5(8) ? . . . .
C(9) C(10) C(11) C(26) 179.0(5) ? . . . .
C(10) C(11) C(12) C(13) 1.7(8) ? . . . .
C(26) C(11) C(12) C(13) -178.7(5) ? . . . .
C(11) C(12) C(13) C(8) 0.0(6) ? . . . .
C(11) C(12) C(13) C(14) -177.7(4) ? . . . .
C(8) C(13) C(14) C(16) -112.6(5) ? . . . .
C(12) C(13) C(14) C(16) 65.0(6) ? . . . .
C(13) C(14) C(16) C(15) 63.0(6) ? . . . .
C(13) C(14) C(16) C(17) -114.5(5) ? . . . .
O(3) C(15) C(16) C(14) 5.7(7) ? . . . .
O(3) C(15) C(16) C(17) -177.0(4) ? . . . .
O(3) C(15) C(20) C(19) 176.0(4) ? . . . .
O(3) C(15) C(20) C(27) -4.6(7) ? . . . .
C(16) C(15) C(20) C(19) -5.1(7) ? . . . .
C(16) C(15) C(20) C(27) 174.3(4) ? . . . .
C(20) C(15) C(16) C(14) -173.2(4) ? . . . .
C(20) C(15) C(16) C(17) 4.1(7) ? . . . .
C(14) C(16) C(17) C(18) 177.6(4) ? . . . .
C(15) C(16) C(17) C(18) 0.1(6) ? . . . .
C(16) C(17) C(18) C(19) -3.0(7) ? . . . .
C(16) C(17) C(18) C(31) 177.9(5) ? . . . .
C(17) C(18) C(19) C(20) 1.8(8) ? . . . .
C(31) C(18) C(19) C(20) -179.1(5) ? . . . .
C(18) C(19) C(20) C(15) 2.2(8) ? . . . .
C(18) C(19) C(20) C(27) -177.2(5) ? . . . .
C(15) C(20) C(27) C(28) -175.1(4) ? . . . .
C(15) C(20) C(27) C(29) 64.3(6) ? . . . .
C(15) C(20) C(27) C(30) -58.4(6) ? . . . .
C(19) C(20) C(27) C(28) 4.3(7) ? . . . .
C(19) C(20) C(27) C(29) -116.3(5) ? . . . .
C(19) C(20) C(27) C(30) 120.9(5) ? . . . .
O(4) C(33) C(34) C(35) -21.9(6) ? . . . .
C(33) C(34) C(35) C(36) 27.6(7) ? . . . .
C(34) C(35) C(36) O(4) -22.6(6) ? . . . .
C(38) C(37) C(42) C(41) 2.7(14) ? . . . .
C(42) C(37) C(38) C(39) -4.6(12) ? . . . .
C(43) C(37) C(38) C(39) 179.0(8) ? . . . .
C(43) C(37) C(42) C(41) 178.9(9) ? . . . .
C(37) C(38) C(39) C(40) 6.1(15) ? . . . .
C(38) C(39) C(40) C(41) -5.5(18) ? . . . .
C(39) C(40) C(41) C(42) 3.1(19) ? . . . .
C(40) C(41) C(42) C(37) -1.9(18) ? . . . .

loop_
_geom_contact_atom_site_label_1
_geom_contact_atom_site_label_2
_geom_contact_distance
_geom_contact_publ_flag
_geom_contact_site_symmetry_1
_geom_contact_site_symmetry_2
Cl(1) C(32) 3.379(5) ? . 2_547
Cl(2) C(32) 3.507(5) ? . 2_547
Cl(2) C(36) 3.575(5) ? . 2_547
C(18) C(34) 3.583(8) ? . 2_547
C(32) Cl(1) 3.379(5) ? . 2_557
C(32) Cl(2) 3.507(5) ? . 2_557
C(34) C(18) 3.583(8) ? . 2_557
C(36) Cl(2) 3.575(5) ? . 2_557


#==============================================================================

# Additional structures and associated data_? identifiers
# should be added at this point if there is more than one 
# structure analysis in the CIF.

#==============================================================================

#     End of CIF

#==============================================================================
#===END
data_General
_audit_creation_date                  '2007-05-28'
_audit_creation_method                'by CrystalStructure 3.8'
_audit_update_record                   ?

#==============================================================================

# PROCESSING SUMMARY (IUCr Office Use Only)

_journal_date_recd_electronic     ?
_journal_date_from_coeditor       ?
_journal_date_accepted            ?
_journal_coeditor_code            ?

#==============================================================================

# SUBMISSION DETAILS

_publ_contact_author_name             'ENTER NAME'
_publ_contact_author_email            'ENTER EMAIL ADDRESS'
_publ_contact_author_fax              'ENTER FAX NUMBER'
_publ_contact_author_phone            'ENTER PHONE NUMBER'
_publ_contact_letter
;
    ENTER TEXT OF LETTER
;
_publ_requested_journal               'ENTER JOURNAL NAME HERE'
_publ_requested_category              'FM'
_publ_requested_coeditor_name          ?

#==============================================================================

# TITLE AND AUTHOR LIST

_publ_section_title
;
    ENTER SECTION TITLE
;
_publ_section_title_footnote
;
    ENTER FOOTNOTE TO TITLE OF PAPER
;
loop_
_publ_author_name
_publ_author_footnote
_publ_author_address
' FIRST AUTHORS NAME '
;
  FIRST AUTHORS FOOTNOTES
;
;
  FIRST AUTHORS ADDRESS
;
_publ_section_synopsis
;
  ENTER SYNOPSIS
;

#==============================================================================

# TEXT

_publ_section_abstract
;
    ENTER ABSTRACT
;
_publ_section_comment
;
    ENTER TEXT
;
_publ_section_references
;
    ENTER OTHER REFERENCES

    Rigaku/MSC and Rigaku Corporation. (2006).
    CrystalStructure (Version 3.8). 
    Single Crystal Structure Analysis Software.
    Rigaku/MSC, 9009 TX, USA 77381-5209.
    Rigaku, Tokyo 196-8666, Japan.

    Carruthers, J.R., Rollett,J.S., Betteridge, P.W.,
  Kinna, D., Pearce, L., Larsen, A., and Gabe, E.(1999)
    CRYSTALS Issue 11, Chemical Crystallography Laboratory, Oxford, UK.

;
_publ_section_figure_captions
;
    ENTER FIGURE CAPTIONS
;
_publ_section_exptl_prep
;
    ENTER COMPOUND PREPARATION DETAILS
;
_publ_section_exptl_refinement
;
    ENTER SPECIAL DETAILS OF THE REFINEMENT
;

#==============================================================================

data___[tBuO2O]2Zr2Cl4
_publ_requested_journal          Inorg.Chem.
_publ_contact_author_name        'Hiroyuki Kawaguchi'
_publ_contact_author_address     'Institute for Molecular Science'
_publ_contact_author_email       hkawa@ims.ac.jp
loop_
_publ_author_name
_publ_author_address
'Matsuo, Tsukasa' 'Institute for Molecular Science'

#==============================================================================

# CHEMICAL DATA

_chemical_formula_sum            'C79 H113 Cl4 O6 Zr2 '
_chemical_formula_moiety         'C79 H113 Cl4 O6 Zr2 '
_chemical_formula_weight         1483.01
_chemical_melting_point          ?

#==============================================================================

# CRYSTAL DATA
_symmetry_cell_setting           triclinic
_symmetry_space_group_name_H-M   'P -1'
_symmetry_space_group_name_Hall  '-P 1'
_symmetry_Int_Tables_number      2
loop_
_symmetry_equiv_pos_site_id
_symmetry_equiv_pos_as_xyz
1 +X,+Y,+Z
2 -X,-Y,-Z

#------------------------------------------------------------------------------

_cell_length_a                   14.655(7)
_cell_length_b                   17.712(9)
_cell_length_c                   17.960(9)
_cell_angle_alpha                105.240(7)
_cell_angle_beta                 103.929(6)
_cell_angle_gamma                106.4080(11)
_cell_volume                     4057(3)
_cell_formula_units_Z            2
_cell_measurement_reflns_used    12465
_cell_measurement_theta_min      3.0
_cell_measurement_theta_max      27.5
_cell_measurement_temperature    173.1

#------------------------------------------------------------------------------

_exptl_crystal_description       prism
_exptl_crystal_colour            colorless
_exptl_crystal_size_max          0.35
_exptl_crystal_size_mid          0.20
_exptl_crystal_size_min          0.05
_exptl_crystal_density_diffrn    1.214
_exptl_crystal_density_meas      ?
_exptl_crystal_density_method    'not measured'
_exptl_crystal_F_000             1566.00
_exptl_absorpt_coefficient_mu    0.435
_exptl_absorpt_correction_type   multi-scan
_exptl_absorpt_process_details   'Jacobson, R. (1998) Private communication'
_exptl_absorpt_correction_T_min  0.881
_exptl_absorpt_correction_T_max  0.978

#==============================================================================

# EXPERIMENTAL DATA

_diffrn_radiation_type           'Mo K\a'
_diffrn_radiation_wavelength     0.71070
_diffrn_measurement_device_type  'Rigaku Saturn'
_diffrn_measurement_method       \w
_diffrn_detector_area_resol_mean 7.31
_diffrn_reflns_number            31173
_diffrn_reflns_av_R_equivalents  0.035
_diffrn_reflns_theta_max         27.48
_diffrn_measured_fraction_theta_max 0.930
_diffrn_reflns_theta_full        25.25
_diffrn_measured_fraction_theta_full 0.955
_diffrn_reflns_limit_h_min       -19
_diffrn_reflns_limit_h_max       19
_diffrn_reflns_limit_k_min       -22
_diffrn_reflns_limit_k_max       17
_diffrn_reflns_limit_l_min       -23
_diffrn_reflns_limit_l_max       18

#==============================================================================

# REFINEMENT DATA

_refine_special_details          
;
    Refinement was performed using reflections with F^2^ > -100.0 sigma(F^2^).
    The weighted     R-factor (wR) and goodness of fit (S) are based on F^2^.
    R-factor (gt) are based on F. The threshold expression of
    F^2^ > 2.0 sigma(F^2^) is used only for calculating R-factor (gt).
;
_reflns_number_total             14055
_reflns_number_gt                12734
_reflns_threshold_expression     F^2^>2.0\s(F^2^)
_refine_ls_structure_factor_coef Fsqd
_refine_ls_R_factor_gt           0.0891
_refine_ls_wR_factor_ref         0.1915
_refine_ls_hydrogen_treatment    refall
_refine_ls_number_reflns         14057
_refine_ls_number_parameters     875
_refine_ls_goodness_of_fit_ref   1.406
_refine_ls_weighting_scheme      calc
_refine_ls_weighting_details     
'w = 1/[0.0003Fo^2^ + 4.5000\s(Fo^2^) + 0.5000]/(4Fo^2^)'
_refine_ls_shift/su_max          0.0000
_refine_diff_density_max         1.45
_refine_diff_density_min         -0.68
_refine_ls_extinction_method     none
_refine_ls_extinction_coef       ?

loop_
_atom_type_symbol
_atom_type_description
_atom_type_scat_dispersion_real
_atom_type_scat_dispersion_imag
_atom_type_scat_source
C C 0.003 0.002
;
International Tables for Crystallography
(1992, Vol. C, Tables 4.2.6.8 and 6.1.1.4)
;
H H 0.000 0.000
;
International Tables for Crystallography
(1992, Vol. C, Table 6.1.1.4)
;
O O 0.011 0.006
;
International Tables for Crystallography
(1992, Vol. C, Tables 4.2.6.8 and 6.1.1.4)
;
Cl Cl 0.148 0.159
;
International Tables for Crystallography
(1992, Vol. C, Tables 4.2.6.8 and 6.1.1.4)
;
Zr Zr -2.967 0.560
;
International Tables for Crystallography
(1992, Vol. C, Tables 4.2.6.8 and 6.1.1.4)
;

#==============================================================================

# ATOMIC COORDINATES AND THERMAL PARAMETERS

loop_
_atom_site_label
_atom_site_type_symbol
_atom_site_fract_x
_atom_site_fract_y
_atom_site_fract_z
_atom_site_U_iso_or_equiv
_atom_site_adp_type
_atom_site_occupancy
_atom_site_symmetry_multiplicity
_atom_site_calc_flag
_atom_site_refinement_flags
_atom_site_disorder_assembly
_atom_site_disorder_group
Zr(1) Zr 0.76254(4) 0.63840(4) 0.75667(3) 0.02181(16) Uani 1.00 1 d . . .
Zr(2) Zr 0.68686(4) 0.42551(4) 0.81582(3) 0.02310(17) Uani 1.00 1 d . . .
Cl(1) Cl 0.80646(12) 0.63945(11) 0.63575(10) 0.0329(4) Uani 1.00 1 d . . .
Cl(2) Cl 0.78447(11) 0.49276(9) 0.72986(9) 0.0254(4) Uani 1.00 1 d . . .
Cl(3) Cl 0.66565(11) 0.57307(9) 0.84458(9) 0.0237(4) Uani 1.00 1 d . . .
Cl(4) Cl 0.77902(13) 0.33227(11) 0.80273(10) 0.0353(4) Uani 1.00 1 d . . .
O(1) O 0.7177(3) 0.7315(2) 0.7711(2) 0.0270(12) Uani 1.00 1 d . . .
O(2) O 0.5998(2) 0.5516(2) 0.6574(2) 0.0201(10) Uani 1.00 1 d . . .
O(3) O 0.5709(3) 0.3621(2) 0.7159(2) 0.0260(11) Uani 1.00 1 d . . .
O(4) O 0.6312(3) 0.3984(2) 0.8959(2) 0.0270(12) Uani 1.00 1 d . . .
O(5) O 0.8388(2) 0.5166(2) 0.9246(2) 0.0244(11) Uani 1.00 1 d . . .
O(6) O 0.8963(3) 0.6919(2) 0.8393(2) 0.0249(11) Uani 1.00 1 d . . .
C(1) C 0.6811(4) 0.7932(3) 0.7613(3) 0.0286(18) Uani 1.00 1 d . . .
C(2) C 0.7050(5) 0.8681(3) 0.8276(3) 0.0340(19) Uani 1.00 1 d . . .
C(3) C 0.6563(6) 0.9220(4) 0.8112(4) 0.051(2) Uani 1.00 1 d . . .
C(4) C 0.5916(6) 0.9074(4) 0.7351(4) 0.060(2) Uani 1.00 1 d . . .
C(5) C 0.5745(5) 0.8355(4) 0.6701(4) 0.047(2) Uani 1.00 1 d . . .
C(6) C 0.6178(5) 0.7782(3) 0.6827(3) 0.0297(18) Uani 1.00 1 d . . .
C(7) C 0.5878(4) 0.6972(3) 0.6118(3) 0.0265(17) Uani 1.00 1 d . . .
C(8) C 0.5072(4) 0.5658(3) 0.6448(3) 0.0203(15) Uani 1.00 1 d . . .
C(9) C 0.4992(4) 0.6309(3) 0.6163(3) 0.0225(16) Uani 1.00 1 d . . .
C(10) C 0.4060(4) 0.6373(3) 0.5938(3) 0.0277(18) Uani 1.00 1 d . . .
C(11) C 0.3209(4) 0.5828(4) 0.6002(3) 0.0280(18) Uani 1.00 1 d . . .
C(12) C 0.3343(4) 0.5226(3) 0.6343(3) 0.0257(17) Uani 1.00 1 d . . .
C(13) C 0.4262(4) 0.5127(3) 0.6556(3) 0.0232(16) Uani 1.00 1 d . . .
C(14) C 0.4354(4) 0.4473(3) 0.6935(3) 0.0257(17) Uani 1.00 1 d . . .
C(15) C 0.4828(4) 0.3199(3) 0.6502(3) 0.0251(17) Uani 1.00 1 d . . .
C(16) C 0.4154(4) 0.3602(3) 0.6360(3) 0.0248(16) Uani 1.00 1 d . . .
C(17) C 0.3247(5) 0.3186(4) 0.5697(4) 0.0341(19) Uani 1.00 1 d . . .
C(18) C 0.2992(5) 0.2372(4) 0.5196(4) 0.039(2) Uani 1.00 1 d . . .
C(19) C 0.3681(5) 0.1983(4) 0.5340(4) 0.041(2) Uani 1.00 1 d . . .
C(20) C 0.4604(5) 0.2366(3) 0.5975(3) 0.0322(19) Uani 1.00 1 d . . .
C(21) C 0.7791(5) 0.8898(3) 0.9152(3) 0.0322(18) Uani 1.00 1 d . . .
C(22) C 0.7340(5) 0.8245(4) 0.9518(4) 0.041(2) Uani 1.00 1 d . . .
C(23) C 0.8838(5) 0.8894(4) 0.9133(4) 0.042(2) Uani 1.00 1 d . . .
C(24) C 0.7986(5) 0.9779(4) 0.9735(4) 0.045(2) Uani 1.00 1 d . . .
C(25) C 0.5405(9) 0.9677(6) 0.7201(5) 0.109(4) Uani 1.00 1 d . . .
C(26) C 0.2173(5) 0.5918(4) 0.5716(4) 0.034(2) Uani 1.00 1 d . . .
C(27) C 0.1360(5) 0.5307(5) 0.5890(5) 0.056(2) Uani 1.00 1 d . . .
C(28) C 0.2285(6) 0.6819(5) 0.6179(5) 0.066(3) Uani 1.00 1 d . . .
C(29) C 0.1847(5) 0.5746(5) 0.4801(4) 0.055(2) Uani 1.00 1 d . . .
C(30) C 0.5346(6) 0.1904(4) 0.6089(4) 0.041(2) Uani 1.00 1 d . . .
C(31) C 0.4921(7) 0.1019(4) 0.5426(4) 0.066(2) Uani 1.00 1 d . . .
C(32) C 0.5496(5) 0.1767(4) 0.6918(4) 0.044(2) Uani 1.00 1 d . . .
C(33) C 0.6331(5) 0.2390(4) 0.5996(4) 0.044(2) Uani 1.00 1 d . . .
C(34) C 0.1988(6) 0.1921(5) 0.4481(4) 0.062(2) Uani 1.00 1 d . . .
C(35) C 0.5922(4) 0.4896(4) 0.5803(3) 0.0294(18) Uani 1.00 1 d . . .
C(36) C 0.6074(4) 0.3724(3) 0.9566(3) 0.0254(17) Uani 1.00 1 d . . .
C(37) C 0.5093(4) 0.3473(3) 0.9589(3) 0.0249(17) Uani 1.00 1 d . . .
C(38) C 0.4975(5) 0.3266(4) 1.0270(3) 0.0350(19) Uani 1.00 1 d . . .
C(39) C 0.5776(5) 0.3257(4) 1.0902(3) 0.0322(19) Uani 1.00 1 d . . .
C(40) C 0.6717(4) 0.3483(3) 1.0831(3) 0.0296(18) Uani 1.00 1 d . . .
C(41) C 0.6891(4) 0.3727(3) 1.0180(3) 0.0261(17) Uani 1.00 1 d . . .
C(42) C 0.7963(4) 0.4047(3) 1.0165(4) 0.0301(18) Uani 1.00 1 d . . .
C(43) C 0.8544(4) 0.5526(4) 1.0096(3) 0.0227(17) Uani 1.00 1 d . . .
C(44) C 0.8417(4) 0.4995(4) 1.0544(3) 0.0273(18) Uani 1.00 1 d . . .
C(45) C 0.8716(4) 0.5375(4) 1.1403(3) 0.0281(18) Uani 1.00 1 d . . .
C(46) C 0.9120(4) 0.6235(4) 1.1810(3) 0.0309(18) Uani 1.00 1 d . . .
C(47) C 0.9184(4) 0.6740(4) 1.1320(3) 0.0299(18) Uani 1.00 1 d . . .
C(48) C 0.8890(4) 0.6390(4) 1.0461(3) 0.0244(17) Uani 1.00 1 d . . .
C(49) C 0.8936(4) 0.6964(4) 0.9970(3) 0.0274(18) Uani 1.00 1 d . . .
C(50) C 0.9888(4) 0.7258(3) 0.9005(3) 0.0222(16) Uani 1.00 1 d . . .
C(51) C 0.9908(4) 0.7266(3) 0.9781(3) 0.0241(17) Uani 1.00 1 d . . .
C(52) C 1.0828(4) 0.7594(3) 1.0424(3) 0.0296(18) Uani 1.00 1 d . . .
C(53) C 1.1743(4) 0.7934(3) 1.0289(4) 0.0305(18) Uani 1.00 1 d . . .
C(54) C 1.1693(4) 0.7937(3) 0.9514(3) 0.0260(17) Uani 1.00 1 d . . .
C(55) C 1.0801(4) 0.7612(3) 0.8867(3) 0.0241(17) Uani 1.00 1 d . . .
C(56) C 0.4179(4) 0.3433(4) 0.8939(3) 0.0323(19) Uani 1.00 1 d . . .
C(57) C 0.4305(5) 0.4301(4) 0.8912(4) 0.042(2) Uani 1.00 1 d . . .
C(58) C 0.4059(5) 0.2827(4) 0.8119(4) 0.045(2) Uani 1.00 1 d . . .
C(59) C 0.3192(5) 0.3102(5) 0.9109(4) 0.051(2) Uani 1.00 1 d . . .
C(60) C 0.5602(5) 0.3023(4) 1.1626(4) 0.046(2) Uani 1.00 1 d . . .
C(61) C 0.9452(5) 0.6610(4) 1.2743(4) 0.038(2) Uani 1.00 1 d . . .
C(62) C 1.0005(9) 0.7529(5) 1.3055(4) 0.103(3) Uani 1.00 1 d . . .
C(63) C 0.8531(6) 0.6373(6) 1.2992(4) 0.069(3) Uani 1.00 1 d . . .
C(64) C 1.0166(6) 0.6216(6) 1.3118(4) 0.069(3) Uani 1.00 1 d . . .
C(65) C 1.0840(4) 0.7635(4) 0.8024(3) 0.0314(19) Uani 1.00 1 d . . .
C(66) C 1.1912(5) 0.8089(4) 0.8058(4) 0.045(2) Uani 1.00 1 d . . .
C(67) C 1.0179(5) 0.8122(4) 0.7717(4) 0.038(2) Uani 1.00 1 d . . .
C(68) C 1.0484(5) 0.6724(4) 0.7431(4) 0.040(2) Uani 1.00 1 d . . .
C(69) C 1.2755(5) 0.8269(4) 1.1003(4) 0.046(2) Uani 1.00 1 d . . .
C(70) C 0.9339(4) 0.5172(4) 0.9127(3) 0.0293(18) Uani 1.00 1 d . . .
C(71) C 0.5575(17) 0.9153(14) 1.0949(14) 0.239(9) Uiso 1.00 1 d . . .
C(72) C 0.5021(19) 0.9294(16) 1.0084(16) 0.241(10) Uiso 1.00 1 d . . .
C(73) C 0.5303(15) 1.0070(14) 1.0511(11) 0.190(7) Uiso 1.00 1 d . . .
C(74) C -0.107(2) 0.9414(18) 0.2057(18) 0.332(14) Uiso 1.00 1 d . . .
C(75) C -0.0093(14) 0.9382(10) 0.1862(10) 0.145(5) Uiso 1.00 1 d . . .
C(76) C 0.0411(17) 0.9745(12) 0.2539(12) 0.073(5) Uiso 0.50 1 d P . .
C(77) C 0.121(2) 0.9601(14) 0.2477(15) 0.216(9) Uiso 1.00 1 d . . .
C(78) C 0.1809(15) 0.9732(12) 0.3483(13) 0.063(5) Uiso 0.50 1 d P . .
C(79) C 0.2389(14) 0.9518(11) 0.3387(11) 0.151(6) Uiso 1.00 1 d . . .
C(80) C 0.0772(16) 0.9257(12) 0.1849(12) 0.070(5) Uiso 0.50 1 d P . .
C(81) C 0.194(2) 0.9635(18) 0.3120(19) 0.095(8) Uiso 0.50 1 d P . .
H(1) H 0.6688 0.9724 0.8562 0.057 Uiso 1.00 1 c R . .
H(2) H 0.5338 0.8262 0.6149 0.052 Uiso 1.00 1 c R . .
H(3) H 0.5685 0.7069 0.5606 0.032 Uiso 1.00 1 c R . .
H(4) H 0.6442 0.6784 0.6153 0.032 Uiso 1.00 1 c R . .
H(5) H 0.3981 0.6797 0.5707 0.035 Uiso 1.00 1 c R . .
H(6) H 0.2771 0.4858 0.6420 0.032 Uiso 1.00 1 c R . .
H(7) H 0.5035 0.4680 0.7322 0.031 Uiso 1.00 1 c R . .
H(8) H 0.3874 0.4413 0.7225 0.031 Uiso 1.00 1 c R . .
H(9) H 0.2793 0.3483 0.5599 0.040 Uiso 1.00 1 c R . .
H(10) H 0.3507 0.1414 0.4972 0.042 Uiso 1.00 1 c R . .
H(11) H 0.6694 0.8266 0.9544 0.048 Uiso 1.00 1 c R . .
H(12) H 0.7239 0.7688 0.9164 0.048 Uiso 1.00 1 c R . .
H(13) H 0.7788 0.8364 1.0065 0.048 Uiso 1.00 1 c R . .
H(14) H 0.8762 0.8347 0.8777 0.044 Uiso 1.00 1 c R . .
H(15) H 0.9130 0.9322 0.8925 0.044 Uiso 1.00 1 c R . .
H(16) H 0.9279 0.9014 0.9683 0.044 Uiso 1.00 1 c R . .
H(17) H 0.8441 0.9895 1.0278 0.050 Uiso 1.00 1 c R . .
H(18) H 0.8283 1.0194 0.9515 0.050 Uiso 1.00 1 c R . .
H(19) H 0.7345 0.9805 0.9770 0.050 Uiso 1.00 1 c R . .
H(20) H 0.5961 1.0194 0.7321 0.119 Uiso 1.00 1 c R . .
H(21) H 0.4965 0.9485 0.6636 0.119 Uiso 1.00 1 c R . .
H(22) H 0.5024 0.9778 0.7565 0.118 Uiso 1.00 1 c R . .
H(23) H 0.0720 0.5377 0.5708 0.078 Uiso 1.00 1 c R . .
H(24) H 0.1285 0.4735 0.5603 0.078 Uiso 1.00 1 c R . .
H(25) H 0.1563 0.5420 0.6476 0.078 Uiso 1.00 1 c R . .
H(26) H 0.2509 0.6928 0.6764 0.088 Uiso 1.00 1 c R . .
H(27) H 0.2795 0.7198 0.6052 0.088 Uiso 1.00 1 c R . .
H(28) H 0.1655 0.6909 0.6018 0.088 Uiso 1.00 1 c R . .
H(29) H 0.1198 0.5801 0.4613 0.069 Uiso 1.00 1 c R . .
H(30) H 0.2353 0.6150 0.4693 0.069 Uiso 1.00 1 c R . .
H(31) H 0.1792 0.5180 0.4513 0.070 Uiso 1.00 1 c R . .
H(32) H 0.4304 0.0677 0.5471 0.075 Uiso 1.00 1 c R . .
H(33) H 0.4773 0.1078 0.4893 0.075 Uiso 1.00 1 c R . .
H(34) H 0.5412 0.0750 0.5488 0.075 Uiso 1.00 1 c R . .
H(35) H 0.4851 0.1434 0.6929 0.052 Uiso 1.00 1 c R . .
H(36) H 0.5964 0.1478 0.6997 0.052 Uiso 1.00 1 c R . .
H(37) H 0.5768 0.2313 0.7355 0.052 Uiso 1.00 1 c R . .
H(38) H 0.6800 0.2100 0.6049 0.057 Uiso 1.00 1 c R . .
H(39) H 0.6162 0.2429 0.5454 0.057 Uiso 1.00 1 c R . .
H(40) H 0.6641 0.2952 0.6409 0.057 Uiso 1.00 1 c R . .
H(41) H 0.1433 0.1880 0.4692 0.061 Uiso 1.00 1 c R . .
H(42) H 0.1941 0.2220 0.4100 0.061 Uiso 1.00 1 c R . .
H(43) H 0.1953 0.1359 0.4198 0.061 Uiso 1.00 1 c R . .
H(44) H 0.5363 0.4374 0.5664 0.037 Uiso 1.00 1 c R . .
H(45) H 0.5808 0.5117 0.5362 0.037 Uiso 1.00 1 c R . .
H(46) H 0.6547 0.4792 0.5877 0.037 Uiso 1.00 1 c R . .
H(47) H 0.4312 0.3125 1.0327 0.040 Uiso 1.00 1 c R . .
H(48) H 0.7278 0.3481 1.1246 0.034 Uiso 1.00 1 c R . .
H(49) H 0.8379 0.3810 1.0463 0.039 Uiso 1.00 1 c R . .
H(50) H 0.7938 0.3880 0.9599 0.039 Uiso 1.00 1 c R . .
H(51) H 0.8629 0.5007 1.1717 0.036 Uiso 1.00 1 c R . .
H(52) H 0.9433 0.7347 1.1584 0.036 Uiso 1.00 1 c R . .
H(53) H 0.8394 0.6664 0.9445 0.034 Uiso 1.00 1 c R . .
H(54) H 0.8826 0.7452 1.0270 0.034 Uiso 1.00 1 c R . .
H(55) H 1.0851 0.7607 1.0971 0.034 Uiso 1.00 1 c R . .
H(56) H 1.2314 0.8179 0.9414 0.032 Uiso 1.00 1 c R . .
H(57) H 0.4921 0.4537 0.8805 0.053 Uiso 1.00 1 c R . .
H(58) H 0.3730 0.4275 0.8488 0.053 Uiso 1.00 1 c R . .
H(59) H 0.4345 0.4654 0.9443 0.053 Uiso 1.00 1 c R . .
H(60) H 0.3968 0.2275 0.8154 0.049 Uiso 1.00 1 c R . .
H(61) H 0.3483 0.2788 0.7689 0.049 Uiso 1.00 1 c R . .
H(62) H 0.4671 0.3034 0.7996 0.049 Uiso 1.00 1 c R . .
H(63) H 0.3237 0.3482 0.9628 0.061 Uiso 1.00 1 c R . .
H(64) H 0.2631 0.3074 0.8672 0.061 Uiso 1.00 1 c R . .
H(65) H 0.3085 0.2545 0.9136 0.061 Uiso 1.00 1 c R . .
H(66) H 0.4893 0.2879 1.1570 0.056 Uiso 1.00 1 c R . .
H(67) H 0.5789 0.2539 1.1624 0.056 Uiso 1.00 1 c R . .
H(68) H 0.6012 0.3487 1.2138 0.056 Uiso 1.00 1 c R . .
H(69) H 1.0215 0.7748 1.3649 0.102 Uiso 1.00 1 c R . .
H(70) H 1.0597 0.7651 1.2888 0.102 Uiso 1.00 1 c R . .
H(71) H 0.9565 0.7792 1.2829 0.102 Uiso 1.00 1 c R . .
H(72) H 0.8740 0.6600 1.3586 0.080 Uiso 1.00 1 c R . .
H(73) H 0.8061 0.6609 1.2758 0.080 Uiso 1.00 1 c R . .
H(74) H 0.8206 0.5766 1.2799 0.080 Uiso 1.00 1 c R . .
H(75) H 0.9835 0.5609 1.2926 0.089 Uiso 1.00 1 c R . .
H(76) H 1.0762 0.6358 1.2959 0.088 Uiso 1.00 1 c R . .
H(77) H 1.0364 0.6444 1.3712 0.088 Uiso 1.00 1 c R . .
H(78) H 1.2352 0.7807 0.8244 0.053 Uiso 1.00 1 c R . .
H(79) H 1.1891 0.8080 0.7512 0.053 Uiso 1.00 1 c R . .
H(80) H 1.2170 0.8667 0.8431 0.053 Uiso 1.00 1 c R . .
H(81) H 1.0457 0.8701 0.8092 0.046 Uiso 1.00 1 c R . .
H(82) H 1.0176 0.8109 0.7173 0.046 Uiso 1.00 1 c R . .
H(83) H 0.9493 0.7855 0.7697 0.046 Uiso 1.00 1 c R . .
H(84) H 0.9798 0.6426 0.7391 0.049 Uiso 1.00 1 c R . .
H(85) H 1.0496 0.6726 0.6894 0.049 Uiso 1.00 1 c R . .
H(86) H 1.0920 0.6445 0.7631 0.049 Uiso 1.00 1 c R . .
H(87) H 1.2797 0.7810 1.1191 0.049 Uiso 1.00 1 c R . .
H(88) H 1.3335 0.8476 1.0841 0.049 Uiso 1.00 1 c R . .
H(89) H 1.2748 0.8721 1.1443 0.049 Uiso 1.00 1 c R . .
H(90) H 0.9598 0.4832 0.9399 0.037 Uiso 1.00 1 c R . .
H(91) H 0.9231 0.4947 0.8546 0.037 Uiso 1.00 1 c R . .
H(92) H 0.9824 0.5747 0.9362 0.037 Uiso 1.00 1 c R . .


loop_
_atom_site_aniso_label
_atom_site_aniso_U_11
_atom_site_aniso_U_22
_atom_site_aniso_U_33
_atom_site_aniso_U_12
_atom_site_aniso_U_13
_atom_site_aniso_U_23
Zr(1) 0.0207(3) 0.0254(3) 0.0200(3) 0.0093(2) 0.0061(2) 0.0091(2)
Zr(2) 0.0221(3) 0.0285(3) 0.0228(3) 0.0134(2) 0.0073(2) 0.0113(2)
Cl(1) 0.0324(9) 0.0442(10) 0.0270(8) 0.0154(8) 0.0125(7) 0.0166(7)
Cl(2) 0.0285(8) 0.0304(8) 0.0252(8) 0.0164(7) 0.0114(6) 0.0142(6)
Cl(3) 0.0219(7) 0.0272(8) 0.0239(8) 0.0109(6) 0.0081(6) 0.0098(6)
Cl(4) 0.0383(10) 0.0391(9) 0.0404(10) 0.0253(8) 0.0157(7) 0.0187(8)
O(1) 0.032(2) 0.026(2) 0.022(2) 0.012(2) 0.0032(18) 0.0081(18)
O(2) 0.021(2) 0.023(2) 0.016(2) 0.0126(18) 0.0037(17) 0.0049(17)
O(3) 0.028(2) 0.024(2) 0.025(2) 0.012(2) 0.0063(19) 0.0096(18)
O(4) 0.025(2) 0.038(2) 0.027(2) 0.017(2) 0.0090(19) 0.018(2)
O(5) 0.017(2) 0.039(2) 0.023(2) 0.014(2) 0.0068(17) 0.0158(19)
O(6) 0.022(2) 0.034(2) 0.021(2) 0.0089(19) 0.0077(18) 0.0132(19)
C(1) 0.029(3) 0.023(3) 0.036(3) 0.011(2) 0.008(2) 0.014(2)
C(2) 0.046(4) 0.023(3) 0.028(3) 0.013(3) 0.008(3) 0.006(2)
C(3) 0.072(5) 0.027(4) 0.044(4) 0.030(4) -0.002(4) 0.002(3)
C(4) 0.077(6) 0.035(4) 0.053(5) 0.032(4) -0.011(4) 0.007(3)
C(5) 0.062(5) 0.031(4) 0.038(4) 0.021(3) -0.004(3) 0.012(3)
C(6) 0.039(4) 0.021(3) 0.027(3) 0.012(3) 0.005(3) 0.012(2)
C(7) 0.031(3) 0.028(3) 0.021(3) 0.013(2) 0.005(2) 0.011(2)
C(8) 0.019(3) 0.024(3) 0.015(3) 0.012(2) 0.003(2) 0.002(2)
C(9) 0.023(3) 0.025(3) 0.016(3) 0.010(2) 0.003(2) 0.005(2)
C(10) 0.035(3) 0.029(3) 0.023(3) 0.016(3) 0.011(2) 0.010(2)
C(11) 0.029(3) 0.037(3) 0.022(3) 0.022(3) 0.007(2) 0.008(2)
C(12) 0.021(3) 0.033(3) 0.025(3) 0.013(2) 0.006(2) 0.012(2)
C(13) 0.027(3) 0.025(3) 0.018(3) 0.013(2) 0.004(2) 0.008(2)
C(14) 0.024(3) 0.033(3) 0.020(3) 0.009(2) 0.004(2) 0.014(2)
C(15) 0.029(3) 0.023(3) 0.017(3) 0.004(2) 0.002(2) 0.011(2)
C(16) 0.025(3) 0.022(3) 0.023(3) 0.003(2) 0.004(2) 0.011(2)
C(17) 0.032(3) 0.031(3) 0.038(4) 0.010(3) 0.008(3) 0.015(3)
C(18) 0.036(4) 0.032(4) 0.036(4) -0.003(3) 0.003(3) 0.016(3)
C(19) 0.054(4) 0.021(3) 0.032(4) 0.006(3) -0.002(3) 0.007(3)
C(20) 0.047(4) 0.018(3) 0.032(3) 0.012(3) 0.013(3) 0.009(2)
C(21) 0.032(3) 0.025(3) 0.029(3) 0.008(3) 0.002(2) 0.002(2)
C(22) 0.054(5) 0.037(4) 0.028(3) 0.020(3) 0.010(3) 0.008(3)
C(23) 0.038(4) 0.033(4) 0.039(4) 0.006(3) 0.008(3) 0.001(3)
C(24) 0.051(5) 0.041(4) 0.032(4) 0.017(3) 0.003(3) 0.006(3)
C(25) 0.153(11) 0.071(6) 0.072(7) 0.081(7) -0.026(6) -0.005(5)
C(26) 0.031(3) 0.044(4) 0.036(4) 0.026(3) 0.011(3) 0.015(3)
C(27) 0.028(4) 0.081(6) 0.085(6) 0.031(4) 0.025(4) 0.051(5)
C(28) 0.054(5) 0.080(6) 0.085(6) 0.051(5) 0.032(5) 0.026(5)
C(29) 0.040(4) 0.094(6) 0.040(4) 0.041(4) 0.006(3) 0.026(4)
C(30) 0.063(5) 0.027(3) 0.027(3) 0.021(3) 0.004(3) 0.004(3)
C(31) 0.108(8) 0.034(4) 0.046(5) 0.038(5) 0.006(4) 0.003(3)
C(32) 0.056(5) 0.034(4) 0.039(4) 0.019(3) 0.006(3) 0.017(3)
C(33) 0.057(5) 0.048(4) 0.038(4) 0.033(4) 0.018(3) 0.014(3)
C(34) 0.056(5) 0.048(5) 0.049(5) -0.001(4) -0.011(4) 0.013(4)
C(35) 0.032(3) 0.039(3) 0.020(3) 0.023(3) 0.008(2) 0.006(2)
C(36) 0.027(3) 0.030(3) 0.025(3) 0.013(2) 0.011(2) 0.014(2)
C(37) 0.022(3) 0.027(3) 0.023(3) 0.006(2) 0.006(2) 0.009(2)
C(38) 0.025(3) 0.041(4) 0.035(4) 0.008(3) 0.010(3) 0.011(3)
C(39) 0.031(3) 0.038(4) 0.028(3) 0.010(3) 0.011(3) 0.013(3)
C(40) 0.027(3) 0.028(3) 0.030(3) 0.007(2) 0.003(2) 0.013(2)
C(41) 0.022(3) 0.026(3) 0.029(3) 0.010(2) 0.007(2) 0.009(2)
C(42) 0.025(3) 0.035(3) 0.037(4) 0.016(3) 0.008(2) 0.020(3)
C(43) 0.013(3) 0.040(3) 0.020(3) 0.014(2) 0.004(2) 0.017(2)
C(44) 0.015(3) 0.037(3) 0.037(3) 0.015(2) 0.008(2) 0.019(3)
C(45) 0.020(3) 0.039(4) 0.030(3) 0.009(3) 0.008(2) 0.022(3)
C(46) 0.020(3) 0.046(4) 0.026(3) 0.007(3) 0.007(2) 0.017(3)
C(47) 0.021(3) 0.040(4) 0.030(3) 0.010(3) 0.009(2) 0.015(3)
C(48) 0.015(3) 0.037(3) 0.026(3) 0.010(2) 0.007(2) 0.018(2)
C(49) 0.026(3) 0.036(3) 0.022(3) 0.013(3) 0.004(2) 0.016(2)
C(50) 0.021(3) 0.024(3) 0.020(3) 0.010(2) 0.000(2) 0.008(2)
C(51) 0.024(3) 0.026(3) 0.029(3) 0.013(2) 0.010(2) 0.016(2)
C(52) 0.028(3) 0.026(3) 0.030(3) 0.010(2) 0.005(2) 0.009(2)
C(53) 0.024(3) 0.015(3) 0.043(4) 0.007(2) 0.002(2) 0.004(2)
C(54) 0.024(3) 0.028(3) 0.029(3) 0.009(2) 0.011(2) 0.011(2)
C(55) 0.025(3) 0.025(3) 0.025(3) 0.010(2) 0.012(2) 0.009(2)
C(56) 0.022(3) 0.054(4) 0.024(3) 0.014(3) 0.006(2) 0.021(3)
C(57) 0.038(4) 0.064(5) 0.031(4) 0.027(3) 0.011(3) 0.021(3)
C(58) 0.027(4) 0.059(5) 0.036(4) 0.008(3) 0.001(3) 0.016(3)
C(59) 0.020(3) 0.093(6) 0.041(4) 0.013(4) 0.006(3) 0.035(4)
C(60) 0.040(4) 0.068(5) 0.032(4) 0.015(4) 0.010(3) 0.027(3)
C(61) 0.038(4) 0.046(4) 0.025(3) 0.008(3) 0.010(3) 0.015(3)
C(62) 0.175(12) 0.059(6) 0.021(4) -0.008(6) 0.015(5) 0.003(4)
C(63) 0.051(5) 0.117(8) 0.033(4) 0.024(5) 0.020(4) 0.018(4)
C(64) 0.057(5) 0.129(8) 0.035(4) 0.048(6) 0.010(4) 0.040(5)
C(65) 0.026(3) 0.037(3) 0.032(3) 0.010(3) 0.013(2) 0.014(3)
C(66) 0.031(4) 0.062(5) 0.039(4) 0.007(3) 0.015(3) 0.021(3)
C(67) 0.038(4) 0.040(4) 0.038(4) 0.008(3) 0.013(3) 0.023(3)
C(68) 0.033(4) 0.052(4) 0.038(4) 0.020(3) 0.019(3) 0.013(3)
C(69) 0.023(3) 0.045(4) 0.054(4) 0.004(3) 0.001(3) 0.014(3)
C(70) 0.016(3) 0.046(4) 0.031(3) 0.015(3) 0.010(2) 0.016(3)

#==============================================================================

_computing_data_collection       CrystalClear
_computing_cell_refinement       CrystalClear
_computing_data_reduction        CrystalStructure
_computing_structure_solution    SIR97
_computing_structure_refinement  CRYSTALS
_computing_publication_material  'CrystalStructure 3.8'
_computing_molecular_graphics    ?

#==============================================================================

# MOLECULAR GEOMETRY

_geom_special_details            
;
    ENTER SPECIAL DETAILS OF THE MOLECULAR GEOMETRY
;

loop_
_geom_bond_atom_site_label_1
_geom_bond_atom_site_label_2
_geom_bond_distance
_geom_bond_publ_flag
_geom_bond_site_symmetry_1
_geom_bond_site_symmetry_2
Zr(1) Cl(1) 2.412(2) yes . .
Zr(1) Cl(2) 2.6228(18) yes . .
Zr(1) Cl(3) 2.6381(18) yes . .
Zr(1) O(1) 1.921(5) yes . .
Zr(1) O(2) 2.382(3) yes . .
Zr(1) O(6) 1.937(3) yes . .
Zr(2) Cl(2) 2.6298(18) yes . .
Zr(2) Cl(3) 2.6496(18) yes . .
Zr(2) Cl(4) 2.412(2) yes . .
Zr(2) O(3) 1.940(3) yes . .
Zr(2) O(4) 1.917(4) yes . .
Zr(2) O(5) 2.366(3) yes . .
O(1) C(1) 1.378(9) yes . .
O(2) C(8) 1.425(8) yes . .
O(2) C(35) 1.480(7) yes . .
O(3) C(15) 1.369(6) yes . .
O(4) C(36) 1.369(8) yes . .
O(5) C(43) 1.424(7) yes . .
O(5) C(70) 1.457(8) yes . .
O(6) C(50) 1.371(6) yes . .
C(1) C(2) 1.417(8) yes . .
C(1) C(6) 1.399(9) yes . .
C(2) C(3) 1.393(12) yes . .
C(2) C(21) 1.558(8) yes . .
C(3) C(4) 1.372(11) yes . .
C(4) C(5) 1.395(10) yes . .
C(4) C(25) 1.509(16) yes . .
C(5) C(6) 1.379(11) yes . .
C(6) C(7) 1.512(8) yes . .
C(7) C(9) 1.521(8) yes . .
C(8) C(9) 1.400(10) yes . .
C(8) C(13) 1.381(8) yes . .
C(9) C(10) 1.373(10) yes . .
C(10) C(11) 1.395(9) yes . .
C(11) C(12) 1.397(10) yes . .
C(11) C(26) 1.549(10) yes . .
C(12) C(13) 1.383(10) yes . .
C(13) C(14) 1.510(10) yes . .
C(14) C(16) 1.515(8) yes . .
C(15) C(16) 1.387(10) yes . .
C(15) C(20) 1.422(8) yes . .
C(16) C(17) 1.397(7) yes . .
C(17) C(18) 1.371(9) yes . .
C(18) C(19) 1.387(12) yes . .
C(18) C(34) 1.530(9) yes . .
C(19) C(20) 1.386(8) yes . .
C(20) C(30) 1.542(12) yes . .
C(21) C(22) 1.543(10) yes . .
C(21) C(23) 1.545(11) yes . .
C(21) C(24) 1.535(9) yes . .
C(26) C(27) 1.522(11) yes . .
C(26) C(28) 1.535(11) yes . .
C(26) C(29) 1.516(10) yes . .
C(30) C(31) 1.540(8) yes . .
C(30) C(32) 1.546(11) yes . .
C(30) C(33) 1.530(11) yes . .
C(36) C(37) 1.395(9) yes . .
C(36) C(41) 1.417(9) yes . .
C(37) C(38) 1.401(10) yes . .
C(37) C(56) 1.521(9) yes . .
C(38) C(39) 1.430(9) yes . .
C(39) C(40) 1.371(10) yes . .
C(39) C(60) 1.521(11) yes . .
C(40) C(41) 1.400(10) yes . .
C(41) C(42) 1.522(9) yes . .
C(42) C(44) 1.508(8) yes . .
C(43) C(44) 1.391(10) yes . .
C(43) C(48) 1.380(8) yes . .
C(44) C(45) 1.410(8) yes . .
C(45) C(46) 1.380(8) yes . .
C(46) C(47) 1.410(11) yes . .
C(46) C(61) 1.524(9) yes . .
C(47) C(48) 1.406(8) yes . .
C(48) C(49) 1.508(10) yes . .
C(49) C(51) 1.526(9) yes . .
C(50) C(51) 1.384(9) yes . .
C(50) C(55) 1.418(9) yes . .
C(51) C(52) 1.394(7) yes . .
C(52) C(53) 1.413(10) yes . .
C(53) C(54) 1.378(10) yes . .
C(53) C(69) 1.544(8) yes . .
C(54) C(55) 1.372(7) yes . .
C(55) C(65) 1.539(10) yes . .
C(56) C(57) 1.511(11) yes . .
C(56) C(58) 1.512(9) yes . .
C(56) C(59) 1.535(10) yes . .
C(61) C(62) 1.475(10) yes . .
C(61) C(63) 1.505(12) yes . .
C(61) C(64) 1.536(14) yes . .
C(65) C(66) 1.528(10) yes . .
C(65) C(67) 1.564(11) yes . .
C(65) C(68) 1.537(8) yes . .
C(71) C(72) 1.69(4) yes . .
C(72) C(73) 1.27(3) yes . .
C(72) C(73) 1.82(4) yes . 2_677
C(73) C(73) 1.75(2) yes . 2_677
C(74) C(75) 1.57(4) yes . .
C(75) C(76) 1.15(2) yes . .
C(75) C(77) 1.84(3) yes . .
C(75) C(80) 1.35(3) yes . .
C(76) C(77) 1.30(4) yes . .
C(76) C(80) 1.60(3) yes . .
C(77) C(78) 1.73(3) yes . .
C(77) C(80) 1.06(2) yes . .
C(77) C(81) 1.34(4) yes . .
C(78) C(79) 1.06(3) yes . .
C(78) C(81) 0.71(4) yes . .
C(79) C(81) 0.83(4) yes . .

loop_
_geom_angle_atom_site_label_1
_geom_angle_atom_site_label_2
_geom_angle_atom_site_label_3
_geom_angle
_geom_angle_publ_flag
_geom_angle_site_symmetry_1
_geom_angle_site_symmetry_2
_geom_angle_site_symmetry_3
Cl(1) Zr(1) Cl(2) 85.97(6) yes . . .
Cl(1) Zr(1) Cl(3) 155.74(4) yes . . .
Cl(1) Zr(1) O(1) 98.66(15) yes . . .
Cl(1) Zr(1) O(2) 82.38(11) yes . . .
Cl(1) Zr(1) O(6) 99.81(14) yes . . .
Cl(2) Zr(1) Cl(3) 77.68(5) yes . . .
Cl(2) Zr(1) O(1) 168.17(12) yes . . .
Cl(2) Zr(1) O(2) 81.54(11) yes . . .
Cl(2) Zr(1) O(6) 89.39(14) yes . . .
Cl(3) Zr(1) O(1) 94.35(15) yes . . .
Cl(3) Zr(1) O(2) 77.63(11) yes . . .
Cl(3) Zr(1) O(6) 97.84(14) yes . . .
O(1) Zr(1) O(2) 88.25(14) yes . . .
O(1) Zr(1) O(6) 100.45(17) yes . . .
O(2) Zr(1) O(6) 170.53(18) yes . . .
Cl(2) Zr(2) Cl(3) 77.36(5) yes . . .
Cl(2) Zr(2) Cl(4) 85.23(6) yes . . .
Cl(2) Zr(2) O(3) 88.67(14) yes . . .
Cl(2) Zr(2) O(4) 168.32(10) yes . . .
Cl(2) Zr(2) O(5) 81.80(11) yes . . .
Cl(3) Zr(2) Cl(4) 155.17(5) yes . . .
Cl(3) Zr(2) O(3) 98.01(14) yes . . .
Cl(3) Zr(2) O(4) 94.66(15) yes . . .
Cl(3) Zr(2) O(5) 77.66(12) yes . . .
Cl(4) Zr(2) O(3) 99.15(14) yes . . .
Cl(4) Zr(2) O(4) 99.51(16) yes . . .
Cl(4) Zr(2) O(5) 82.50(12) yes . . .
O(3) Zr(2) O(4) 101.01(17) yes . . .
O(3) Zr(2) O(5) 170.18(18) yes . . .
O(4) Zr(2) O(5) 88.21(14) yes . . .
Zr(1) Cl(2) Zr(2) 102.95(6) yes . . .
Zr(1) Cl(3) Zr(2) 102.00(6) yes . . .
Zr(1) O(1) C(1) 166.0(4) yes . . .
Zr(1) O(2) C(8) 129.2(2) yes . . .
Zr(1) O(2) C(35) 119.2(3) yes . . .
C(8) O(2) C(35) 108.1(3) yes . . .
Zr(2) O(3) C(15) 173.8(4) yes . . .
Zr(2) O(4) C(36) 167.8(4) yes . . .
Zr(2) O(5) C(43) 128.8(3) yes . . .
Zr(2) O(5) C(70) 117.7(2) yes . . .
C(43) O(5) C(70) 110.4(4) yes . . .
Zr(1) O(6) C(50) 175.9(4) yes . . .
O(1) C(1) C(2) 121.9(5) yes . . .
O(1) C(1) C(6) 116.9(5) yes . . .
C(2) C(1) C(6) 121.1(6) yes . . .
C(1) C(2) C(3) 116.2(5) yes . . .
C(1) C(2) C(21) 123.1(6) yes . . .
C(3) C(2) C(21) 120.7(5) yes . . .
C(2) C(3) C(4) 123.6(6) yes . . .
C(3) C(4) C(5) 118.6(8) yes . . .
C(3) C(4) C(25) 121.8(7) yes . . .
C(5) C(4) C(25) 119.6(7) yes . . .
C(4) C(5) C(6) 120.8(7) yes . . .
C(1) C(6) C(5) 119.5(5) yes . . .
C(1) C(6) C(7) 122.1(6) yes . . .
C(5) C(6) C(7) 118.2(5) yes . . .
C(6) C(7) C(9) 108.4(5) yes . . .
O(2) C(8) C(9) 118.3(5) yes . . .
O(2) C(8) C(13) 120.0(6) yes . . .
C(9) C(8) C(13) 121.6(6) yes . . .
C(7) C(9) C(8) 124.3(6) yes . . .
C(7) C(9) C(10) 117.6(6) yes . . .
C(8) C(9) C(10) 118.0(5) yes . . .
C(9) C(10) C(11) 122.4(7) yes . . .
C(10) C(11) C(12) 117.4(6) yes . . .
C(10) C(11) C(26) 119.9(6) yes . . .
C(12) C(11) C(26) 122.7(6) yes . . .
C(11) C(12) C(13) 121.9(6) yes . . .
C(8) C(13) C(12) 118.5(6) yes . . .
C(8) C(13) C(14) 122.7(6) yes . . .
C(12) C(13) C(14) 118.8(5) yes . . .
C(13) C(14) C(16) 117.4(5) yes . . .
O(3) C(15) C(16) 118.5(5) yes . . .
O(3) C(15) C(20) 121.1(6) yes . . .
C(16) C(15) C(20) 120.4(5) yes . . .
C(14) C(16) C(15) 121.4(4) yes . . .
C(14) C(16) C(17) 118.7(6) yes . . .
C(15) C(16) C(17) 119.8(5) yes . . .
C(16) C(17) C(18) 121.1(7) yes . . .
C(17) C(18) C(19) 118.3(5) yes . . .
C(17) C(18) C(34) 120.5(7) yes . . .
C(19) C(18) C(34) 121.2(6) yes . . .
C(18) C(19) C(20) 123.5(6) yes . . .
C(15) C(20) C(19) 116.8(7) yes . . .
C(15) C(20) C(30) 122.3(5) yes . . .
C(19) C(20) C(30) 120.8(5) yes . . .
C(2) C(21) C(22) 109.2(4) yes . . .
C(2) C(21) C(23) 111.4(6) yes . . .
C(2) C(21) C(24) 112.4(6) yes . . .
C(22) C(21) C(23) 109.2(6) yes . . .
C(22) C(21) C(24) 108.5(6) yes . . .
C(23) C(21) C(24) 105.9(4) yes . . .
C(11) C(26) C(27) 111.7(6) yes . . .
C(11) C(26) C(28) 108.6(4) yes . . .
C(11) C(26) C(29) 109.4(6) yes . . .
C(27) C(26) C(28) 108.6(7) yes . . .
C(27) C(26) C(29) 108.8(5) yes . . .
C(28) C(26) C(29) 109.7(7) yes . . .
C(20) C(30) C(31) 111.5(6) yes . . .
C(20) C(30) C(32) 109.6(6) yes . . .
C(20) C(30) C(33) 109.5(6) yes . . .
C(31) C(30) C(32) 105.9(6) yes . . .
C(31) C(30) C(33) 106.6(7) yes . . .
C(32) C(30) C(33) 113.8(5) yes . . .
O(4) C(36) C(37) 122.8(5) yes . . .
O(4) C(36) C(41) 116.0(5) yes . . .
C(37) C(36) C(41) 121.2(6) yes . . .
C(36) C(37) C(38) 116.3(5) yes . . .
C(36) C(37) C(56) 124.0(6) yes . . .
C(38) C(37) C(56) 119.7(6) yes . . .
C(37) C(38) C(39) 124.2(6) yes . . .
C(38) C(39) C(40) 116.7(6) yes . . .
C(38) C(39) C(60) 121.9(6) yes . . .
C(40) C(39) C(60) 121.3(6) yes . . .
C(39) C(40) C(41) 121.7(6) yes . . .
C(36) C(41) C(40) 119.7(6) yes . . .
C(36) C(41) C(42) 120.2(6) yes . . .
C(40) C(41) C(42) 119.9(5) yes . . .
C(41) C(42) C(44) 110.0(5) yes . . .
O(5) C(43) C(44) 118.5(5) yes . . .
O(5) C(43) C(48) 119.1(6) yes . . .
C(44) C(43) C(48) 122.2(5) yes . . .
C(42) C(44) C(43) 124.1(5) yes . . .
C(42) C(44) C(45) 118.5(6) yes . . .
C(43) C(44) C(45) 117.3(5) yes . . .
C(44) C(45) C(46) 123.3(7) yes . . .
C(45) C(46) C(47) 116.7(5) yes . . .
C(45) C(46) C(61) 121.0(7) yes . . .
C(47) C(46) C(61) 122.3(5) yes . . .
C(46) C(47) C(48) 122.0(6) yes . . .
C(43) C(48) C(47) 118.3(6) yes . . .
C(43) C(48) C(49) 122.4(5) yes . . .
C(47) C(48) C(49) 119.4(5) yes . . .
C(48) C(49) C(51) 116.9(6) yes . . .
O(6) C(50) C(51) 117.7(5) yes . . .
O(6) C(50) C(55) 122.2(5) yes . . .
C(51) C(50) C(55) 120.1(4) yes . . .
C(49) C(51) C(50) 121.6(5) yes . . .
C(49) C(51) C(52) 118.2(6) yes . . .
C(50) C(51) C(52) 120.1(6) yes . . .
C(51) C(52) C(53) 120.2(6) yes . . .
C(52) C(53) C(54) 118.2(5) yes . . .
C(52) C(53) C(69) 119.2(6) yes . . .
C(54) C(53) C(69) 122.6(6) yes . . .
C(53) C(54) C(55) 123.0(6) yes . . .
C(50) C(55) C(54) 118.4(6) yes . . .
C(50) C(55) C(65) 123.2(4) yes . . .
C(54) C(55) C(65) 118.4(6) yes . . .
C(37) C(56) C(57) 110.1(4) yes . . .
C(37) C(56) C(58) 108.8(6) yes . . .
C(37) C(56) C(59) 112.3(6) yes . . .
C(57) C(56) C(58) 111.5(6) yes . . .
C(57) C(56) C(59) 107.2(7) yes . . .
C(58) C(56) C(59) 106.9(4) yes . . .
C(46) C(61) C(62) 111.7(6) yes . . .
C(46) C(61) C(63) 108.4(5) yes . . .
C(46) C(61) C(64) 109.1(6) yes . . .
C(62) C(61) C(63) 112.4(8) yes . . .
C(62) C(61) C(64) 107.7(6) yes . . .
C(63) C(61) C(64) 107.5(7) yes . . .
C(55) C(65) C(66) 112.3(4) yes . . .
C(55) C(65) C(67) 109.8(6) yes . . .
C(55) C(65) C(68) 108.3(5) yes . . .
C(66) C(65) C(67) 107.0(6) yes . . .
C(66) C(65) C(68) 106.9(6) yes . . .
C(67) C(65) C(68) 112.6(4) yes . . .
C(71) C(72) C(73) 87.8(19) yes . . .
C(71) C(72) C(73) 153.9(17) yes . . 2_677
C(73) C(72) C(73) 66.2(18) yes . . 2_677
C(72) C(73) C(72) 114(2) yes . . 2_677
C(72) C(73) C(73) 72.2(18) yes . . 2_677
C(72) C(73) C(73) 41.6(12) yes 2_677 . 2_677
C(74) C(75) C(76) 92(2) yes . . .
C(74) C(75) C(77) 135.2(18) yes . . .
C(74) C(75) C(80) 165(2) yes . . .
C(76) C(75) C(77) 44.5(17) yes . . .
C(76) C(75) C(80) 79.3(19) yes . . .
C(77) C(75) C(80) 34.8(12) yes . . .
C(75) C(76) C(77) 97(2) yes . . .
C(75) C(76) C(80) 55.8(16) yes . . .
C(77) C(76) C(80) 41.2(14) yes . . .
C(75) C(77) C(76) 38.5(12) yes . . .
C(75) C(77) C(78) 134(2) yes . . .
C(75) C(77) C(80) 46.7(19) yes . . .
C(75) C(77) C(81) 155(2) yes . . .
C(76) C(77) C(78) 100(2) yes . . .
C(76) C(77) C(80) 85(2) yes . . .
C(76) C(77) C(81) 123(2) yes . . .
C(78) C(77) C(80) 156(2) yes . . .
C(78) C(77) C(81) 22.6(19) yes . . .
C(80) C(77) C(81) 145(3) yes . . .
C(77) C(78) C(79) 97(2) yes . . .
C(77) C(78) C(81) 46(3) yes . . .
C(79) C(78) C(81) 52(3) yes . . .
C(78) C(79) C(81) 42(3) yes . . .
C(75) C(80) C(76) 44.9(12) yes . . .
C(75) C(80) C(77) 98(2) yes . . .
C(76) C(80) C(77) 54(2) yes . . .
C(77) C(81) C(78) 111(4) yes . . .
C(77) C(81) C(79) 159(4) yes . . .
C(78) C(81) C(79) 86(4) yes . . .

loop_
_geom_torsion_atom_site_label_1
_geom_torsion_atom_site_label_2
_geom_torsion_atom_site_label_3
_geom_torsion_atom_site_label_4
_geom_torsion
_geom_torsion_publ_flag
_geom_torsion_site_symmetry_1
_geom_torsion_site_symmetry_2
_geom_torsion_site_symmetry_3
_geom_torsion_site_symmetry_4
Cl(1) Zr(1) Cl(2) Zr(2) -161.44(5) ? . . . .
Cl(1) Zr(1) Cl(3) Zr(2) 48.21(17) ? . . . .
Cl(1) Zr(1) O(1) C(1) 24.7(16) ? . . . .
Cl(1) Zr(1) O(2) C(8) -117.9(4) ? . . . .
Cl(1) Zr(1) O(2) C(35) 38.4(4) ? . . . .
Cl(1) Zr(1) O(6) C(50) -142(6) ? . . . .
Cl(2) Zr(1) Cl(3) Zr(2) -0.52(4) ? . . . .
Cl(3) Zr(1) Cl(2) Zr(2) 0.53(4) ? . . . .
Cl(2) Zr(1) O(1) C(1) -87.6(18) ? . . . .
O(1) Zr(1) Cl(2) Zr(2) -47.9(6) ? . . . .
Cl(2) Zr(1) O(2) C(8) 155.1(4) ? . . . .
Cl(2) Zr(1) O(2) C(35) -48.6(4) ? . . . .
O(2) Zr(1) Cl(2) Zr(2) -78.56(11) ? . . . .
Cl(2) Zr(1) O(6) C(50) -56(6) ? . . . .
O(6) Zr(1) Cl(2) Zr(2) 98.69(14) ? . . . .
Cl(3) Zr(1) O(1) C(1) -134.7(15) ? . . . .
O(1) Zr(1) Cl(3) Zr(2) 170.63(10) ? . . . .
Cl(3) Zr(1) O(2) C(8) 75.9(4) ? . . . .
Cl(3) Zr(1) O(2) C(35) -127.8(4) ? . . . .
O(2) Zr(1) Cl(3) Zr(2) 83.38(11) ? . . . .
Cl(3) Zr(1) O(6) C(50) 21(6) ? . . . .
O(6) Zr(1) Cl(3) Zr(2) -88.17(14) ? . . . .
O(1) Zr(1) O(2) C(8) -18.9(4) ? . . . .
O(1) Zr(1) O(2) C(35) 137.4(4) ? . . . .
O(2) Zr(1) O(1) C(1) -57.3(16) ? . . . .
O(1) Zr(1) O(6) C(50) 117(6) ? . . . .
O(6) Zr(1) O(1) C(1) 126.5(15) ? . . . .
O(2) Zr(1) O(6) C(50) -39(6) ? . . . .
O(6) Zr(1) O(2) C(8) 138.1(10) ? . . . .
O(6) Zr(1) O(2) C(35) -65.6(12) ? . . . .
Cl(2) Zr(2) Cl(3) Zr(1) 0.52(4) ? . . . .
Cl(3) Zr(2) Cl(2) Zr(1) -0.53(4) ? . . . .
Cl(4) Zr(2) Cl(2) Zr(1) -162.72(5) ? . . . .
Cl(2) Zr(2) O(3) C(15) -134(4) ? . . . .
O(3) Zr(2) Cl(2) Zr(1) 97.98(14) ? . . . .
Cl(2) Zr(2) O(4) C(36) -93.9(17) ? . . . .
O(4) Zr(2) Cl(2) Zr(1) -48.2(7) ? . . . .
Cl(2) Zr(2) O(5) C(43) 154.3(5) ? . . . .
Cl(2) Zr(2) O(5) C(70) -47.4(4) ? . . . .
O(5) Zr(2) Cl(2) Zr(1) -79.63(12) ? . . . .
Cl(4) Zr(2) Cl(3) Zr(1) 47.07(15) ? . . . .
Cl(3) Zr(2) O(3) C(15) -57(4) ? . . . .
O(3) Zr(2) Cl(3) Zr(1) -86.29(15) ? . . . .
Cl(3) Zr(2) O(4) C(36) -140.2(14) ? . . . .
O(4) Zr(2) Cl(3) Zr(1) 171.89(11) ? . . . .
Cl(3) Zr(2) O(5) C(43) 75.6(5) ? . . . .
Cl(3) Zr(2) O(5) C(70) -126.2(4) ? . . . .
O(5) Zr(2) Cl(3) Zr(1) 84.75(12) ? . . . .
Cl(4) Zr(2) O(3) C(15) 141(4) ? . . . .
Cl(4) Zr(2) O(4) C(36) 19.3(14) ? . . . .
Cl(4) Zr(2) O(5) C(43) -119.4(5) ? . . . .
Cl(4) Zr(2) O(5) C(70) 38.8(4) ? . . . .
O(3) Zr(2) O(4) C(36) 120.7(14) ? . . . .
O(4) Zr(2) O(3) C(15) 39(4) ? . . . .
O(3) Zr(2) O(5) C(43) 140.2(10) ? . . . .
O(3) Zr(2) O(5) C(70) -61.6(12) ? . . . .
O(5) Zr(2) O(3) C(15) -120(3) ? . . . .
O(4) Zr(2) O(5) C(43) -19.6(5) ? . . . .
O(4) Zr(2) O(5) C(70) 138.6(4) ? . . . .
O(5) Zr(2) O(4) C(36) -62.8(14) ? . . . .
Zr(1) O(1) C(1) C(2) -157.1(12) ? . . . .
Zr(1) O(1) C(1) C(6) 24(2) ? . . . .
Zr(1) O(2) C(8) C(9) 67.7(6) ? . . . .
Zr(1) O(2) C(8) C(13) -116.4(4) ? . . . .
C(35) O(2) C(8) C(9) -90.6(5) ? . . . .
C(35) O(2) C(8) C(13) 85.3(6) ? . . . .
Zr(2) O(3) C(15) C(16) 45(4) ? . . . .
Zr(2) O(3) C(15) C(20) -135(3) ? . . . .
Zr(2) O(4) C(36) C(37) -151.0(12) ? . . . .
Zr(2) O(4) C(36) C(41) 29.3(17) ? . . . .
Zr(2) O(5) C(43) C(44) 67.2(7) ? . . . .
Zr(2) O(5) C(43) C(48) -117.8(5) ? . . . .
C(70) O(5) C(43) C(44) -92.3(6) ? . . . .
C(70) O(5) C(43) C(48) 82.7(7) ? . . . .
Zr(1) O(6) C(50) C(51) -32(6) ? . . . .
Zr(1) O(6) C(50) C(55) 149(5) ? . . . .
O(1) C(1) C(2) C(3) -174.6(6) ? . . . .
O(1) C(1) C(2) C(21) 3.8(11) ? . . . .
O(1) C(1) C(6) C(5) 176.5(6) ? . . . .
O(1) C(1) C(6) C(7) 1.7(10) ? . . . .
C(2) C(1) C(6) C(5) -2.7(11) ? . . . .
C(2) C(1) C(6) C(7) -177.5(6) ? . . . .
C(6) C(1) C(2) C(3) 4.5(11) ? . . . .
C(6) C(1) C(2) C(21) -177.0(6) ? . . . .
C(1) C(2) C(3) C(4) -2.6(12) ? . . . .
C(1) C(2) C(21) C(22) -64.4(9) ? . . . .
C(1) C(2) C(21) C(23) 56.3(8) ? . . . .
C(1) C(2) C(21) C(24) 175.1(7) ? . . . .
C(3) C(2) C(21) C(22) 114.0(8) ? . . . .
C(3) C(2) C(21) C(23) -125.3(7) ? . . . .
C(3) C(2) C(21) C(24) -6.5(10) ? . . . .
C(21) C(2) C(3) C(4) 178.9(8) ? . . . .
C(2) C(3) C(4) C(5) -1.1(14) ? . . . .
C(2) C(3) C(4) C(25) -180.0(8) ? . . . .
C(3) C(4) C(5) C(6) 3.1(13) ? . . . .
C(25) C(4) C(5) C(6) -178.0(8) ? . . . .
C(4) C(5) C(6) C(1) -1.3(12) ? . . . .
C(4) C(5) C(6) C(7) 173.7(7) ? . . . .
C(1) C(6) C(7) C(9) 82.8(8) ? . . . .
C(5) C(6) C(7) C(9) -92.1(8) ? . . . .
C(6) C(7) C(9) C(8) -103.0(7) ? . . . .
C(6) C(7) C(9) C(10) 74.5(6) ? . . . .
O(2) C(8) C(9) C(7) -11.1(7) ? . . . .
O(2) C(8) C(9) C(10) 171.4(4) ? . . . .
O(2) C(8) C(13) C(12) -173.0(4) ? . . . .
O(2) C(8) C(13) C(14) 10.0(7) ? . . . .
C(9) C(8) C(13) C(12) 2.8(8) ? . . . .
C(9) C(8) C(13) C(14) -174.2(5) ? . . . .
C(13) C(8) C(9) C(7) 173.1(5) ? . . . .
C(13) C(8) C(9) C(10) -4.4(8) ? . . . .
C(7) C(9) C(10) C(11) -176.1(5) ? . . . .
C(8) C(9) C(10) C(11) 1.6(8) ? . . . .
C(9) C(10) C(11) C(12) 2.8(8) ? . . . .
C(9) C(10) C(11) C(26) -178.3(5) ? . . . .
C(10) C(11) C(12) C(13) -4.5(8) ? . . . .
C(10) C(11) C(26) C(27) -176.1(5) ? . . . .
C(10) C(11) C(26) C(28) -56.4(8) ? . . . .
C(10) C(11) C(26) C(29) 63.4(7) ? . . . .
C(12) C(11) C(26) C(27) 2.7(8) ? . . . .
C(12) C(11) C(26) C(28) 122.5(7) ? . . . .
C(12) C(11) C(26) C(29) -117.8(7) ? . . . .
C(26) C(11) C(12) C(13) 176.6(5) ? . . . .
C(11) C(12) C(13) C(8) 1.8(8) ? . . . .
C(11) C(12) C(13) C(14) 179.0(5) ? . . . .
C(8) C(13) C(14) C(16) -90.9(6) ? . . . .
C(12) C(13) C(14) C(16) 92.1(7) ? . . . .
C(13) C(14) C(16) C(15) 129.8(7) ? . . . .
C(13) C(14) C(16) C(17) -53.2(9) ? . . . .
O(3) C(15) C(16) C(14) -2.8(10) ? . . . .
O(3) C(15) C(16) C(17) -179.7(6) ? . . . .
O(3) C(15) C(20) C(19) 178.3(6) ? . . . .
O(3) C(15) C(20) C(30) -2.3(11) ? . . . .
C(16) C(15) C(20) C(19) -1.7(11) ? . . . .
C(16) C(15) C(20) C(30) 177.7(7) ? . . . .
C(20) C(15) C(16) C(14) 177.2(6) ? . . . .
C(20) C(15) C(16) C(17) 0.3(8) ? . . . .
C(14) C(16) C(17) C(18) -174.8(7) ? . . . .
C(15) C(16) C(17) C(18) 2.2(11) ? . . . .
C(16) C(17) C(18) C(19) -3.1(12) ? . . . .
C(16) C(17) C(18) C(34) 179.0(7) ? . . . .
C(17) C(18) C(19) C(20) 1.6(12) ? . . . .
C(34) C(18) C(19) C(20) 179.5(8) ? . . . .
C(18) C(19) C(20) C(15) 0.7(12) ? . . . .
C(18) C(19) C(20) C(30) -178.7(7) ? . . . .
C(15) C(20) C(30) C(31) -179.1(7) ? . . . .
C(15) C(20) C(30) C(32) 64.1(8) ? . . . .
C(15) C(20) C(30) C(33) -61.4(8) ? . . . .
C(19) C(20) C(30) C(31) 0.2(8) ? . . . .
C(19) C(20) C(30) C(32) -116.6(7) ? . . . .
C(19) C(20) C(30) C(33) 118.0(7) ? . . . .
O(4) C(36) C(37) C(38) -176.7(5) ? . . . .
O(4) C(36) C(37) C(56) 2.0(9) ? . . . .
O(4) C(36) C(41) C(40) 179.0(5) ? . . . .
O(4) C(36) C(41) C(42) 2.9(8) ? . . . .
C(37) C(36) C(41) C(40) -0.7(9) ? . . . .
C(37) C(36) C(41) C(42) -176.7(5) ? . . . .
C(41) C(36) C(37) C(38) 2.9(9) ? . . . .
C(41) C(36) C(37) C(56) -178.3(5) ? . . . .
C(36) C(37) C(38) C(39) -3.2(9) ? . . . .
C(36) C(37) C(56) C(57) -62.9(8) ? . . . .
C(36) C(37) C(56) C(58) 59.6(8) ? . . . .
C(36) C(37) C(56) C(59) 177.7(6) ? . . . .
C(38) C(37) C(56) C(57) 115.9(7) ? . . . .
C(38) C(37) C(56) C(58) -121.7(6) ? . . . .
C(38) C(37) C(56) C(59) -3.5(8) ? . . . .
C(56) C(37) C(38) C(39) 177.9(6) ? . . . .
C(37) C(38) C(39) C(40) 1.2(9) ? . . . .
C(37) C(38) C(39) C(60) -179.7(6) ? . . . .
C(38) C(39) C(40) C(41) 1.2(9) ? . . . .
C(60) C(39) C(40) C(41) -177.9(6) ? . . . .
C(39) C(40) C(41) C(36) -1.5(9) ? . . . .
C(39) C(40) C(41) C(42) 174.6(5) ? . . . .
C(36) C(41) C(42) C(44) 82.0(7) ? . . . .
C(40) C(41) C(42) C(44) -94.0(7) ? . . . .
C(41) C(42) C(44) C(43) -104.9(7) ? . . . .
C(41) C(42) C(44) C(45) 73.7(7) ? . . . .
O(5) C(43) C(44) C(42) -10.3(9) ? . . . .
O(5) C(43) C(44) C(45) 171.1(5) ? . . . .
O(5) C(43) C(48) C(47) -170.6(5) ? . . . .
O(5) C(43) C(48) C(49) 11.1(9) ? . . . .
C(44) C(43) C(48) C(47) 4.2(9) ? . . . .
C(44) C(43) C(48) C(49) -174.1(6) ? . . . .
C(48) C(43) C(44) C(42) 174.9(6) ? . . . .
C(48) C(43) C(44) C(45) -3.7(9) ? . . . .
C(42) C(44) C(45) C(46) -178.6(6) ? . . . .
C(43) C(44) C(45) C(46) 0.0(9) ? . . . .
C(44) C(45) C(46) C(47) 2.9(10) ? . . . .
C(44) C(45) C(46) C(61) -178.5(6) ? . . . .
C(45) C(46) C(47) C(48) -2.4(10) ? . . . .
C(45) C(46) C(61) C(62) 171.0(8) ? . . . .
C(45) C(46) C(61) C(63) -64.7(10) ? . . . .
C(45) C(46) C(61) C(64) 52.0(9) ? . . . .
C(47) C(46) C(61) C(62) -10.6(11) ? . . . .
C(47) C(46) C(61) C(63) 113.7(8) ? . . . .
C(47) C(46) C(61) C(64) -129.5(7) ? . . . .
C(61) C(46) C(47) C(48) 179.0(6) ? . . . .
C(46) C(47) C(48) C(43) -1.0(10) ? . . . .
C(46) C(47) C(48) C(49) 177.4(6) ? . . . .
C(43) C(48) C(49) C(51) -89.2(6) ? . . . .
C(47) C(48) C(49) C(51) 92.5(7) ? . . . .
C(48) C(49) C(51) C(50) 134.6(6) ? . . . .
C(48) C(49) C(51) C(52) -48.7(7) ? . . . .
O(6) C(50) C(51) C(49) -4.1(9) ? . . . .
O(6) C(50) C(51) C(52) 179.2(6) ? . . . .
O(6) C(50) C(55) C(54) -179.9(4) ? . . . .
O(6) C(50) C(55) C(65) -0.9(10) ? . . . .
C(51) C(50) C(55) C(54) 1.6(10) ? . . . .
C(51) C(50) C(55) C(65) -179.4(6) ? . . . .
C(55) C(50) C(51) C(49) 174.4(6) ? . . . .
C(55) C(50) C(51) C(52) -2.2(10) ? . . . .
C(49) C(51) C(52) C(53) -175.7(6) ? . . . .
C(50) C(51) C(52) C(53) 1.0(10) ? . . . .
C(51) C(52) C(53) C(54) 0.7(10) ? . . . .
C(51) C(52) C(53) C(69) -178.1(6) ? . . . .
C(52) C(53) C(54) C(55) -1.3(10) ? . . . .
C(69) C(53) C(54) C(55) 177.4(6) ? . . . .
C(53) C(54) C(55) C(50) 0.1(8) ? . . . .
C(53) C(54) C(55) C(65) -178.9(6) ? . . . .
C(50) C(55) C(65) C(66) 177.3(6) ? . . . .
C(50) C(55) C(65) C(67) 58.3(7) ? . . . .
C(50) C(55) C(65) C(68) -64.9(8) ? . . . .
C(54) C(55) C(65) C(66) -3.8(9) ? . . . .
C(54) C(55) C(65) C(67) -122.7(6) ? . . . .
C(54) C(55) C(65) C(68) 114.0(6) ? . . . .
C(71) C(72) C(73) C(72) 177.5(19) ? . . . 2_677
C(71) C(72) C(73) C(73) 177.5(19) ? . . . 2_677
C(71) C(72) C(73) C(72) -6(6) ? . . 2_677 2_677
C(71) C(72) C(73) C(73) -6(4) ? . . 2_677 .
C(74) C(75) C(76) C(77) 167(2) ? . . . .
C(74) C(75) C(76) C(80) 167(2) ? . . . .
C(74) C(75) C(77) C(76) -18(3) ? . . . .
C(74) C(75) C(77) C(78) 15(3) ? . . . .
C(74) C(75) C(77) C(80) 161(3) ? . . . .
C(74) C(75) C(77) C(81) 32(6) ? . . . .
C(74) C(75) C(80) C(76) -57(5) ? . . . .
C(74) C(75) C(80) C(77) -57(6) ? . . . .
C(76) C(75) C(77) C(78) 33(2) ? . . . .
C(76) C(75) C(77) C(80) 180(2) ? . . . .
C(76) C(75) C(77) C(81) 50(5) ? . . . .
C(77) C(75) C(76) C(80) -0.2(15) ? . . . .
C(76) C(75) C(80) C(77) -0.3(19) ? . . . .
C(80) C(75) C(76) C(77) 0.2(15) ? . . . .
C(77) C(75) C(80) C(76) 0.3(19) ? . . . .
C(80) C(75) C(77) C(76) -180(2) ? . . . .
C(80) C(75) C(77) C(78) -147(3) ? . . . .
C(80) C(75) C(77) C(81) -129(6) ? . . . .
C(75) C(76) C(77) C(78) -156.6(18) ? . . . .
C(75) C(76) C(77) C(80) -0.3(19) ? . . . .
C(75) C(76) C(77) C(81) -157(2) ? . . . .
C(75) C(76) C(80) C(77) 180(2) ? . . . .
C(77) C(76) C(80) C(75) -180(2) ? . . . .
C(80) C(76) C(77) C(75) 0.3(19) ? . . . .
C(80) C(76) C(77) C(78) -156(2) ? . . . .
C(80) C(76) C(77) C(81) -157(3) ? . . . .
C(75) C(77) C(78) C(79) 151(2) ? . . . .
C(75) C(77) C(78) C(81) 161(4) ? . . . .
C(75) C(77) C(80) C(76) -0.2(17) ? . . . .
C(75) C(77) C(81) C(78) -34(7) ? . . . .
C(75) C(77) C(81) C(79) 111(12) ? . . . .
C(76) C(77) C(78) C(79) 172(2) ? . . . .
C(76) C(77) C(78) C(81) -179(3) ? . . . .
C(76) C(77) C(80) C(75) 0.2(17) ? . . . .
C(76) C(77) C(81) C(78) 1(4) ? . . . .
C(76) C(77) C(81) C(79) 145(11) ? . . . .
C(78) C(77) C(80) C(75) 104(7) ? . . . .
C(78) C(77) C(80) C(76) 104(7) ? . . . .
C(80) C(77) C(78) C(79) 71(8) ? . . . .
C(80) C(77) C(78) C(81) 80(8) ? . . . .
C(78) C(77) C(81) C(79) 144(14) ? . . . .
C(81) C(77) C(78) C(79) -9(3) ? . . . .
C(80) C(77) C(81) C(78) -136(5) ? . . . .
C(80) C(77) C(81) C(79) 8(15) ? . . . .
C(81) C(77) C(80) C(75) 145(5) ? . . . .
C(81) C(77) C(80) C(76) 145(6) ? . . . .
C(77) C(78) C(79) C(81) 9(3) ? . . . .
C(77) C(78) C(81) C(79) -168(4) ? . . . .
C(79) C(78) C(81) C(77) 168(4) ? . . . .
C(78) C(79) C(81) C(77) -147(13) ? . . . .

loop_
_geom_contact_atom_site_label_1
_geom_contact_atom_site_label_2
_geom_contact_distance
_geom_contact_publ_flag
_geom_contact_site_symmetry_1
_geom_contact_site_symmetry_2
C(7) C(18) 3.449(11) ? . 2_666
C(9) C(35) 3.311(7) ? . 2_666
C(10) C(35) 3.348(9) ? . 2_666
C(18) C(7) 3.449(11) ? . 2_666
C(35) C(9) 3.311(7) ? . 2_666
C(35) C(10) 3.348(9) ? . 2_666
C(42) C(53) 3.561(10) ? . 2_767
C(42) C(70) 3.568(8) ? . 2_767
C(44) C(70) 3.310(9) ? . 2_767
C(45) C(70) 3.515(10) ? . 2_767
C(47) C(59) 3.489(10) ? . 2_667
C(52) C(80) 3.39(2) ? . 1_656
C(53) C(42) 3.561(10) ? . 2_767
C(59) C(47) 3.489(10) ? . 2_667
C(70) C(42) 3.568(8) ? . 2_767
C(70) C(44) 3.310(9) ? . 2_767
C(70) C(45) 3.515(10) ? . 2_767
C(70) C(70) 3.563(10) ? . 2_767
C(80) C(52) 3.39(2) ? . 1_454


#==============================================================================

# Additional structures and associated data_? identifiers
# should be added at this point if there is more than one 
# structure analysis in the CIF.

#==============================================================================

#     End of CIF

#==============================================================================
#===END
data_General
_publ_requested_journal          'Inorgnic Chemistry'

#==============================================================================

# SUBMISSION DETAILS

_publ_contact_author_name        'Hiroyuki Kawaguchi'
_publ_contact_author_address     
;Coordination Chemistry Laboratories
Institute for Molecular Science
Myodaiji, Okazaki 444-8787, Japan
;
_publ_contact_author_email       hkawa@ims.ac.jp
_publ_contact_author_phone       'ENTER PHONE NUMBER'
_publ_contact_author_fax         'ENTER FAX NUMBER'
loop_
_publ_author_name
_publ_author_address
'Matsuo, Tsukasa'
;
  FIRST AUTHORS ADDRESS
;
_audit_creation_date             2007-05-28
_audit_creation_method           'by CrystalStructure 3.8'
_audit_update_record             ?

#==============================================================================

# PROCESSING SUMMARY (IUCr Office Use Only)

_journal_date_recd_electronic    ?
_journal_date_from_coeditor      ?
_journal_date_accepted           ?
_journal_coeditor_code           ?
_publ_contact_letter             
;
    ENTER TEXT OF LETTER
;
_publ_requested_category         FM
_publ_requested_coeditor_name    ?

#==============================================================================

# TITLE AND AUTHOR LIST

_publ_section_title              
;
    ENTER SECTION TITLE
;
_publ_section_title_footnote     
;
    ENTER FOOTNOTE TO TITLE OF PAPER
;
loop_
_publ_author_footnote
;
  FIRST AUTHORS FOOTNOTES
;
_publ_section_synopsis           
;
  ENTER SYNOPSIS
;

#==============================================================================

# TEXT

_publ_section_abstract           
;
    ENTER ABSTRACT
;
_publ_section_comment            
;
    ENTER TEXT
;
_publ_section_references         
;
    ENTER OTHER REFERENCES

    Rigaku/MSC and Rigaku Corporation. (2006).
    CrystalStructure (Version 3.8). 
    Single Crystal Structure Analysis Software.
    Rigaku/MSC, 9009 TX, USA 77381-5209.
    Rigaku, Tokyo 196-8666, Japan.

    Carruthers, J.R., Rollett,J.S., Betteridge, P.W.,
  Kinna, D., Pearce, L., Larsen, A., and Gabe, E.(1999)
    CRYSTALS Issue 11, Chemical Crystallography Laboratory, Oxford, UK.

;
_publ_section_figure_captions    
;
    ENTER FIGURE CAPTIONS
;
_publ_section_exptl_prep         
;
    ENTER COMPOUND PREPARATION DETAILS
;
_publ_section_exptl_refinement   
;
    ENTER SPECIAL DETAILS OF THE REFINEMENT
;

#==============================================================================

data___[MeO2O]Zr(CH2Ph)2

#==============================================================================

# CHEMICAL DATA

_chemical_formula_sum                  'C53 H62 O3 Zr '
_chemical_formula_moiety               'C53 H62 O3 Zr '
_chemical_formula_weight               838.29
_chemical_melting_point                ?

#==============================================================================

# CRYSTAL DATA
_symmetry_cell_setting                 triclinic
_symmetry_space_group_name_H-M        'P -1'
_symmetry_space_group_name_Hall       '-P 1'
_symmetry_Int_Tables_number            2
loop_
_symmetry_equiv_pos_site_id
_symmetry_equiv_pos_as_xyz
1   '+X,+Y,+Z'
2   '-X,-Y,-Z'

#------------------------------------------------------------------------------

_cell_length_a                         9.311(3)
_cell_length_b                         14.646(5)
_cell_length_c                         17.238(6)
_cell_angle_alpha                      95.777(7)
_cell_angle_beta                       92.230(3)
_cell_angle_gamma                      102.844(7)
_cell_volume                           2275.8(14)
_cell_formula_units_Z                  2
_cell_measurement_reflns_used          7173
_cell_measurement_theta_min            3.0
_cell_measurement_theta_max            27.5
_cell_measurement_temperature          173.1

#------------------------------------------------------------------------------

_exptl_crystal_description            'prism'
_exptl_crystal_colour                 'colorless'
_exptl_crystal_size_max                0.30
_exptl_crystal_size_mid                0.10
_exptl_crystal_size_min                0.05
_exptl_crystal_density_diffrn          1.223
_exptl_crystal_density_meas            ?
_exptl_crystal_density_method         'not measured'
_exptl_crystal_F_000                   888.00
_exptl_absorpt_coefficient_mu          0.282
_exptl_absorpt_correction_type         multi-scan
_exptl_absorpt_process_details         
'Jacobson, R. (1998) Private communication'
_exptl_absorpt_correction_T_min        0.900
_exptl_absorpt_correction_T_max        0.986

#==============================================================================

# EXPERIMENTAL DATA

_diffrn_radiation_type                'Mo K\a'
_diffrn_radiation_wavelength           0.71070
_diffrn_measurement_device_type       'Rigaku Saturn'
_diffrn_measurement_method             \w
_diffrn_detector_area_resol_mean       7.31
_diffrn_reflns_number                  17490
_diffrn_reflns_av_R_equivalents        0.038
_diffrn_reflns_theta_max               27.48
_diffrn_measured_fraction_theta_max    0.928
_diffrn_reflns_theta_full              27.50
_diffrn_measured_fraction_theta_full   0.926
_diffrn_reflns_limit_h_min             -10
_diffrn_reflns_limit_h_max             12
_diffrn_reflns_limit_k_min             -19
_diffrn_reflns_limit_k_max             13
_diffrn_reflns_limit_l_min             -22
_diffrn_reflns_limit_l_max             22

#==============================================================================

# REFINEMENT DATA

_refine_special_details
;
    Refinement was performed using reflections with F^2^ > -10.0 sigma(F^2^).
    The weighted     R-factor (wR) and goodness of fit (S) are based on F^2^.
    R-factor (gt) are based on F. The threshold expression of
    F^2^ > 2.0 sigma(F^2^) is used only for calculating R-factor (gt).
;
_reflns_number_total                   9656
_reflns_number_gt                      7624
_reflns_threshold_expression           F^2^>2.0\s(F^2^)
_refine_ls_structure_factor_coef       Fsqd
_refine_ls_R_factor_gt                 0.0714
_refine_ls_wR_factor_ref               0.1409
_refine_ls_hydrogen_treatment          refall
_refine_ls_number_reflns               9656
_refine_ls_number_parameters           512
_refine_ls_goodness_of_fit_ref         1.033
_refine_ls_weighting_scheme            calc
_refine_ls_weighting_details
'w = 1/[4.5000\s(Fo^2^)]/(4Fo^2^)'
_refine_ls_shift/su_max                0.0000
_refine_diff_density_max               1.45
_refine_diff_density_min               -0.77
_refine_ls_extinction_method           none
_refine_ls_extinction_coef             ?

loop_
_atom_type_symbol
_atom_type_description
_atom_type_scat_dispersion_real
_atom_type_scat_dispersion_imag
_atom_type_scat_source
  'C' 'C'  0.003 0.002 
;
International Tables for Crystallography
(1992, Vol. C, Tables 4.2.6.8 and 6.1.1.4)
;
  'H' 'H'  0.000 0.000 
;
International Tables for Crystallography
(1992, Vol. C, Table 6.1.1.4)
;
  'O' 'O'  0.011 0.006 
;
International Tables for Crystallography
(1992, Vol. C, Tables 4.2.6.8 and 6.1.1.4)
;
  'Zr' 'Zr'  -2.967 0.560 
;
International Tables for Crystallography
(1992, Vol. C, Tables 4.2.6.8 and 6.1.1.4)
;

#==============================================================================

# ATOMIC COORDINATES AND THERMAL PARAMETERS

loop_
_atom_site_label
_atom_site_type_symbol
_atom_site_fract_x
_atom_site_fract_y
_atom_site_fract_z
_atom_site_U_iso_or_equiv
_atom_site_adp_type
_atom_site_occupancy
_atom_site_symmetry_multiplicity
_atom_site_calc_flag
_atom_site_refinement_flags
_atom_site_disorder_assembly
_atom_site_disorder_group
 Zr(1) Zr 0.97728(5) 0.30823(3) 0.26379(2) 0.02497(11) Uani 1.00 1 d . . .
 O(1) O 0.9970(2) 0.25492(17) 0.36414(15) 0.0258(7) Uani 1.00 1 d . . .
 O(2) O 1.1679(2) 0.24115(17) 0.24764(15) 0.0248(7) Uani 1.00 1 d . . .
 O(3) O 0.9863(2) 0.30989(18) 0.14857(15) 0.0256(7) Uani 1.00 1 d . . .
 C(1) C 1.0489(4) 0.1894(2) 0.4019(2) 0.0243(11) Uani 1.00 1 d . . .
 C(2) C 1.1015(4) 0.2100(2) 0.4812(2) 0.0250(11) Uani 1.00 1 d . . .
 C(3) C 1.1648(4) 0.1437(2) 0.5137(2) 0.0291(12) Uani 1.00 1 d . . .
 C(4) C 1.1758(4) 0.0594(3) 0.4720(2) 0.0342(13) Uani 1.00 1 d . . .
 C(5) C 1.1155(4) 0.0394(2) 0.3970(2) 0.0331(13) Uani 1.00 1 d . . .
 C(6) C 1.0511(4) 0.1019(2) 0.3607(2) 0.0286(12) Uani 1.00 1 d . . .
 C(7) C 0.9766(4) 0.0708(2) 0.2800(2) 0.0325(12) Uani 1.00 1 d . . .
 C(8) C 1.1512(4) 0.1623(2) 0.1923(2) 0.0268(11) Uani 1.00 1 d . . .
 C(9) C 1.0690(4) 0.0766(2) 0.2096(2) 0.0221(11) Uani 1.00 1 d . . .
 C(10) C 1.0665(5) -0.0012(3) 0.1559(2) 0.0379(13) Uani 1.00 1 d . . .
 C(11) C 1.1398(5) 0.0062(3) 0.0875(2) 0.0417(15) Uani 1.00 1 d . . .
 C(12) C 1.2068(4) 0.0951(3) 0.0692(2) 0.0356(13) Uani 1.00 1 d . . .
 C(13) C 1.2120(4) 0.1752(2) 0.1208(2) 0.0289(12) Uani 1.00 1 d . . .
 C(14) C 1.2631(4) 0.2737(2) 0.0981(2) 0.0342(13) Uani 1.00 1 d . . .
 C(15) C 1.0133(4) 0.3136(2) 0.0710(2) 0.0255(11) Uani 1.00 1 d . . .
 C(16) C 1.1487(4) 0.2982(2) 0.0446(2) 0.0289(12) Uani 1.00 1 d . . .
 C(17) C 1.1758(5) 0.3014(2) -0.0341(2) 0.0368(13) Uani 1.00 1 d . . .
 C(18) C 1.0741(5) 0.3174(3) -0.0876(2) 0.0395(14) Uani 1.00 1 d . . .
 C(19) C 0.9445(5) 0.3352(3) -0.0608(2) 0.0380(13) Uani 1.00 1 d . . .
 C(20) C 0.9079(4) 0.3335(2) 0.0170(2) 0.0314(12) Uani 1.00 1 d . . .
 C(21) C 1.0835(4) 0.2989(2) 0.5309(2) 0.0287(11) Uani 1.00 1 d . . .
 C(22) C 1.1702(4) 0.3872(2) 0.4991(2) 0.0354(13) Uani 1.00 1 d . . .
 C(23) C 0.9194(4) 0.3017(3) 0.5321(2) 0.0381(13) Uani 1.00 1 d . . .
 C(24) C 1.1390(5) 0.3011(3) 0.6170(2) 0.0407(14) Uani 1.00 1 d . . .
 C(25) C 1.2465(5) -0.0095(3) 0.5110(2) 0.0465(16) Uani 1.00 1 d . . .
 C(26) C 1.1427(6) -0.0807(3) 0.0330(2) 0.0595(18) Uani 1.00 1 d . . .
 C(27) C 0.7566(4) 0.3469(3) 0.0406(2) 0.0367(13) Uani 1.00 1 d . . .
 C(28) C 0.6700(4) 0.2526(3) 0.0647(2) 0.0408(13) Uani 1.00 1 d . . .
 C(29) C 0.6653(5) 0.3725(3) -0.0272(2) 0.0562(17) Uani 1.00 1 d . . .
 C(30) C 0.7726(5) 0.4282(3) 0.1071(2) 0.0421(14) Uani 1.00 1 d . . .
 C(31) C 1.1020(6) 0.3171(3) -0.1729(2) 0.0562(17) Uani 1.00 1 d . . .
 C(32) C 1.3086(4) 0.2668(2) 0.2931(2) 0.0330(12) Uani 1.00 1 d . . .
 C(33) C 1.0317(4) 0.4655(2) 0.2993(2) 0.0306(12) Uani 1.00 1 d . . .
 C(34) C 1.1914(4) 0.4964(2) 0.2871(2) 0.0285(12) Uani 1.00 1 d . . .
 C(35) C 1.2976(4) 0.5212(2) 0.3496(2) 0.0313(12) Uani 1.00 1 d . . .
 C(36) C 1.4472(5) 0.5431(3) 0.3379(2) 0.0384(13) Uani 1.00 1 d . . .
 C(37) C 1.4966(5) 0.5416(3) 0.2639(2) 0.0394(14) Uani 1.00 1 d . . .
 C(38) C 1.3938(5) 0.5187(3) 0.2013(2) 0.0411(14) Uani 1.00 1 d . . .
 C(39) C 1.2445(5) 0.4973(2) 0.2118(2) 0.0351(13) Uani 1.00 1 d . . .
 C(40) C 0.7296(4) 0.2602(3) 0.2594(2) 0.0314(12) Uani 1.00 1 d . . .
 C(41) C 0.6647(4) 0.2661(2) 0.3374(2) 0.0290(12) Uani 1.00 1 d . . .
 C(42) C 0.6474(4) 0.3517(2) 0.3736(2) 0.0300(12) Uani 1.00 1 d . . .
 C(43) C 0.5850(4) 0.3578(3) 0.4445(2) 0.0343(13) Uani 1.00 1 d . . .
 C(44) C 0.5371(4) 0.2779(3) 0.4818(2) 0.0373(13) Uani 1.00 1 d . . .
 C(45) C 0.5550(4) 0.1923(3) 0.4470(2) 0.0371(13) Uani 1.00 1 d . . .
 C(46) C 0.6184(4) 0.1859(3) 0.3764(2) 0.0318(12) Uani 1.00 1 d . . .
 C(47) C 0.4400 -0.1460 0.2510 0.377 Uiso 1.00 1 d R . .
 C(48) C 0.5650 -0.1590 0.2100 0.204 Uiso 1.00 1 d R . .
 C(49) C 0.6300 -0.1130 0.1640 0.252 Uiso 1.00 1 d R . .
 C(50) C 0.5880 -0.0230 0.1420 0.174 Uiso 1.00 1 d R . .
 C(51) C 0.4950 -0.0110 0.1880 0.256 Uiso 1.00 1 d R . .
 C(52) C 0.4110 -0.0610 0.2380 0.285 Uiso 1.00 1 d R . .
 C(53) C 0.3490 -0.2110 0.2980 0.187 Uiso 1.00 1 d R . .
 H(1) H 1.2035 0.1575 0.5677 0.035 Uiso 1.00 1 c R . .
 H(2) H 1.1171 -0.0208 0.3683 0.041 Uiso 1.00 1 c R . .
 H(3) H 0.9242 0.0057 0.2797 0.038 Uiso 1.00 1 c R . .
 H(4) H 0.9062 0.1097 0.2731 0.038 Uiso 1.00 1 c R . .
 H(5) H 1.0126 -0.0628 0.1668 0.045 Uiso 1.00 1 c R . .
 H(6) H 1.2510 0.1016 0.0195 0.044 Uiso 1.00 1 c R . .
 H(7) H 1.2813 0.3184 0.1449 0.041 Uiso 1.00 1 c R . .
 H(8) H 1.3537 0.2776 0.0714 0.042 Uiso 1.00 1 c R . .
 H(9) H 1.2699 0.2923 -0.0517 0.045 Uiso 1.00 1 c R . .
 H(10) H 0.8739 0.3494 -0.0980 0.047 Uiso 1.00 1 c R . .
 H(11) H 1.2744 0.3870 0.5023 0.041 Uiso 1.00 1 c R . .
 H(12) H 1.1372 0.3872 0.4451 0.041 Uiso 1.00 1 c R . .
 H(13) H 1.1549 0.4432 0.5297 0.041 Uiso 1.00 1 c R . .
 H(14) H 0.9096 0.3592 0.5625 0.046 Uiso 1.00 1 c R . .
 H(15) H 0.8797 0.3002 0.4789 0.046 Uiso 1.00 1 c R . .
 H(16) H 0.8654 0.2477 0.5552 0.046 Uiso 1.00 1 c R . .
 H(17) H 1.0833 0.2472 0.6396 0.048 Uiso 1.00 1 c R . .
 H(18) H 1.2427 0.2995 0.6190 0.048 Uiso 1.00 1 c R . .
 H(19) H 1.1268 0.3587 0.6463 0.048 Uiso 1.00 1 c R . .
 H(20) H 1.1749 -0.0684 0.5128 0.059 Uiso 1.00 1 c R . .
 H(21) H 1.3282 -0.0211 0.4812 0.059 Uiso 1.00 1 c R . .
 H(22) H 1.2830 0.0175 0.5637 0.059 Uiso 1.00 1 c R . .
 H(23) H 1.0907 -0.1365 0.0546 0.072 Uiso 1.00 1 c R . .
 H(24) H 1.0963 -0.0772 -0.0177 0.072 Uiso 1.00 1 c R . .
 H(25) H 1.2448 -0.0839 0.0271 0.072 Uiso 1.00 1 c R . .
 H(26) H 0.5734 0.2589 0.0803 0.049 Uiso 1.00 1 c R . .
 H(27) H 0.6587 0.2047 0.0204 0.049 Uiso 1.00 1 c R . .
 H(28) H 0.7236 0.2347 0.1078 0.049 Uiso 1.00 1 c R . .
 H(29) H 0.7177 0.4316 -0.0436 0.071 Uiso 1.00 1 c R . .
 H(30) H 0.6513 0.3233 -0.0707 0.071 Uiso 1.00 1 c R . .
 H(31) H 0.5699 0.3791 -0.0097 0.071 Uiso 1.00 1 c R . .
 H(32) H 0.8296 0.4159 0.1516 0.054 Uiso 1.00 1 c R . .
 H(33) H 0.8228 0.4865 0.0885 0.054 Uiso 1.00 1 c R . .
 H(34) H 0.6756 0.4337 0.1227 0.054 Uiso 1.00 1 c R . .
 H(35) H 1.1978 0.3033 -0.1813 0.070 Uiso 1.00 1 c R . .
 H(36) H 1.0261 0.2697 -0.2037 0.070 Uiso 1.00 1 c R . .
 H(37) H 1.1011 0.3787 -0.1888 0.070 Uiso 1.00 1 c R . .
 H(38) H 1.3224 0.2150 0.3212 0.039 Uiso 1.00 1 c R . .
 H(39) H 1.3876 0.2819 0.2582 0.039 Uiso 1.00 1 c R . .
 H(40) H 1.3099 0.3216 0.3301 0.039 Uiso 1.00 1 c R . .
 H(41) H 0.9744 0.4963 0.2666 0.038 Uiso 1.00 1 c R . .
 H(42) H 1.0124 0.4794 0.3536 0.037 Uiso 1.00 1 c R . .
 H(43) H 1.2650 0.5233 0.4023 0.037 Uiso 1.00 1 c R . .
 H(44) H 1.5176 0.5594 0.3828 0.045 Uiso 1.00 1 c R . .
 H(45) H 1.6013 0.5573 0.2558 0.047 Uiso 1.00 1 c R . .
 H(46) H 1.4273 0.5173 0.1487 0.049 Uiso 1.00 1 c R . .
 H(47) H 1.1744 0.4820 0.1667 0.041 Uiso 1.00 1 c R . .
 H(48) H 0.6875 0.2991 0.2267 0.038 Uiso 1.00 1 c R . .
 H(49) H 0.7023 0.1951 0.2363 0.038 Uiso 1.00 1 c R . .
 H(50) H 0.6793 0.4082 0.3480 0.036 Uiso 1.00 1 c R . .
 H(51) H 0.5750 0.4187 0.4684 0.041 Uiso 1.00 1 c R . .
 H(52) H 0.4920 0.2821 0.5314 0.046 Uiso 1.00 1 c R . .
 H(53) H 0.5234 0.1361 0.4729 0.046 Uiso 1.00 1 c R . .
 H(54) H 0.6306 0.1252 0.3532 0.039 Uiso 1.00 1 c R . .


loop_
_atom_site_aniso_label
_atom_site_aniso_U_11
_atom_site_aniso_U_22
_atom_site_aniso_U_33
_atom_site_aniso_U_12
_atom_site_aniso_U_13
_atom_site_aniso_U_23
 Zr(1) 0.0239(2) 0.0304(2) 0.0218(2) 0.00920(17) 0.00061(16) 0.00225(16)
 O(1) 0.0249(15) 0.0325(16) 0.0216(15) 0.0089(12) 0.0005(12) 0.0051(12)
 O(2) 0.0199(15) 0.0276(15) 0.0269(15) 0.0083(11) -0.0044(12) -0.0020(12)
 O(3) 0.0211(15) 0.0368(16) 0.0198(14) 0.0075(12) 0.0024(12) 0.0048(12)
 C(1) 0.021(2) 0.024(2) 0.030(2) 0.0061(17) 0.0024(17) 0.0096(17)
 C(2) 0.020(2) 0.030(2) 0.024(2) 0.0033(18) 0.0035(17) 0.0074(17)
 C(3) 0.021(2) 0.038(2) 0.029(2) 0.0033(19) 0.0028(18) 0.014(2)
 C(4) 0.030(2) 0.033(2) 0.046(2) 0.010(2) 0.011(2) 0.022(2)
 C(5) 0.033(2) 0.026(2) 0.042(2) 0.0080(19) 0.009(2) 0.009(2)
 C(6) 0.027(2) 0.027(2) 0.032(2) 0.0040(18) 0.0061(19) 0.0100(19)
 C(7) 0.030(2) 0.026(2) 0.037(2) 0.0013(19) 0.005(2) -0.0018(19)
 C(8) 0.023(2) 0.026(2) 0.032(2) 0.0115(18) -0.0032(18) -0.0023(18)
 C(9) 0.022(2) 0.023(2) 0.021(2) 0.0082(17) -0.0023(17) -0.0017(16)
 C(10) 0.040(2) 0.033(2) 0.040(2) 0.010(2) 0.002(2) -0.002(2)
 C(11) 0.046(3) 0.042(3) 0.039(2) 0.018(2) -0.002(2) -0.007(2)
 C(12) 0.035(2) 0.044(2) 0.032(2) 0.017(2) 0.007(2) 0.001(2)
 C(13) 0.020(2) 0.036(2) 0.033(2) 0.0121(18) 0.0017(18) 0.0016(19)
 C(14) 0.024(2) 0.044(2) 0.036(2) 0.009(2) 0.010(2) 0.006(2)
 C(15) 0.026(2) 0.028(2) 0.023(2) 0.0050(18) 0.0050(18) 0.0034(17)
 C(16) 0.026(2) 0.032(2) 0.029(2) 0.0063(19) 0.0074(19) 0.0043(18)
 C(17) 0.038(2) 0.043(2) 0.032(2) 0.011(2) 0.013(2) 0.006(2)
 C(18) 0.052(3) 0.042(2) 0.027(2) 0.011(2) 0.017(2) 0.008(2)
 C(19) 0.046(3) 0.048(2) 0.024(2) 0.015(2) 0.003(2) 0.012(2)
 C(20) 0.036(2) 0.034(2) 0.027(2) 0.012(2) 0.006(2) 0.0089(19)
 C(21) 0.028(2) 0.037(2) 0.022(2) 0.0079(19) 0.0006(18) 0.0040(18)
 C(22) 0.040(2) 0.033(2) 0.030(2) 0.004(2) -0.004(2) 0.0009(19)
 C(23) 0.036(2) 0.044(2) 0.035(2) 0.013(2) 0.002(2) -0.004(2)
 C(24) 0.044(3) 0.047(2) 0.029(2) 0.011(2) -0.005(2) -0.001(2)
 C(25) 0.042(3) 0.047(3) 0.058(3) 0.014(2) 0.008(2) 0.028(2)
 C(26) 0.076(4) 0.052(3) 0.052(3) 0.028(2) 0.005(3) -0.018(2)
 C(27) 0.035(2) 0.056(3) 0.025(2) 0.020(2) -0.001(2) 0.010(2)
 C(28) 0.029(2) 0.060(3) 0.032(2) 0.011(2) -0.001(2) -0.004(2)
 C(29) 0.047(3) 0.090(4) 0.041(3) 0.034(3) -0.003(2) 0.017(2)
 C(30) 0.048(3) 0.050(2) 0.038(2) 0.028(2) 0.005(2) 0.010(2)
 C(31) 0.073(4) 0.070(3) 0.031(2) 0.023(3) 0.020(2) 0.008(2)
 C(32) 0.021(2) 0.040(2) 0.037(2) 0.0073(19) -0.0041(19) 0.002(2)
 C(33) 0.034(2) 0.030(2) 0.030(2) 0.0112(19) -0.001(2) 0.0044(18)
 C(34) 0.036(2) 0.020(2) 0.029(2) 0.0059(18) -0.0018(19) 0.0031(17)
 C(35) 0.038(2) 0.030(2) 0.025(2) 0.006(2) 0.001(2) 0.0047(18)
 C(36) 0.036(2) 0.043(2) 0.034(2) 0.003(2) -0.006(2) 0.010(2)
 C(37) 0.035(2) 0.045(2) 0.037(2) 0.004(2) 0.006(2) 0.010(2)
 C(38) 0.044(3) 0.046(2) 0.033(2) 0.005(2) 0.012(2) 0.010(2)
 C(39) 0.038(2) 0.039(2) 0.027(2) 0.004(2) -0.001(2) 0.005(2)
 C(40) 0.024(2) 0.042(2) 0.028(2) 0.0071(19) 0.0010(19) 0.0048(19)
 C(41) 0.019(2) 0.042(2) 0.027(2) 0.0080(19) -0.0026(18) 0.006(2)
 C(42) 0.022(2) 0.033(2) 0.035(2) 0.0049(19) -0.0000(19) 0.0090(19)
 C(43) 0.030(2) 0.038(2) 0.036(2) 0.013(2) -0.002(2) -0.001(2)
 C(44) 0.030(2) 0.056(3) 0.030(2) 0.014(2) 0.005(2) 0.010(2)
 C(45) 0.028(2) 0.046(2) 0.041(2) 0.008(2) 0.006(2) 0.021(2)
 C(46) 0.025(2) 0.035(2) 0.037(2) 0.0075(19) 0.003(2) 0.008(2)

#==============================================================================

_computing_data_collection            'CrystalClear'
_computing_cell_refinement            'CrystalClear'
_computing_data_reduction             'CrystalStructure'
_computing_structure_solution         'SIR97'
_computing_structure_refinement       'CRYSTALS'
_computing_publication_material       'CrystalStructure 3.8'
_computing_molecular_graphics          ?

#==============================================================================

# MOLECULAR GEOMETRY

_geom_special_details
;
    ENTER SPECIAL DETAILS OF THE MOLECULAR GEOMETRY
;

loop_
_geom_bond_atom_site_label_1
_geom_bond_atom_site_label_2
_geom_bond_distance
_geom_bond_publ_flag
_geom_bond_site_symmetry_1
_geom_bond_site_symmetry_2
Zr(1) O(1) 1.987(2) yes . .
Zr(1) O(2) 2.225(2) yes . .
Zr(1) O(3) 1.994(2) yes . .
Zr(1) C(33) 2.261(3) yes . .
Zr(1) C(40) 2.253(3) yes . .
O(1) C(1) 1.374(5) yes . .
O(2) C(8) 1.398(4) yes . .
O(2) C(32) 1.454(4) yes . .
O(3) C(15) 1.374(4) yes . .
C(1) C(2) 1.414(5) yes . .
C(1) C(6) 1.406(5) yes . .
C(2) C(3) 1.393(6) yes . .
C(2) C(21) 1.530(5) yes . .
C(3) C(4) 1.392(6) yes . .
C(4) C(5) 1.367(6) yes . .
C(4) C(25) 1.516(7) yes . .
C(5) C(6) 1.385(6) yes . .
C(6) C(7) 1.509(5) yes . .
C(7) C(9) 1.514(5) yes . .
C(8) C(9) 1.384(5) yes . .
C(8) C(13) 1.389(5) yes . .
C(9) C(10) 1.389(5) yes . .
C(10) C(11) 1.387(6) yes . .
C(11) C(12) 1.387(6) yes . .
C(11) C(26) 1.510(6) yes . .
C(12) C(13) 1.390(5) yes . .
C(13) C(14) 1.510(5) yes . .
C(14) C(16) 1.509(6) yes . .
C(15) C(16) 1.413(6) yes . .
C(15) C(20) 1.423(6) yes . .
C(16) C(17) 1.394(6) yes . .
C(17) C(18) 1.371(6) yes . .
C(18) C(19) 1.377(7) yes . .
C(18) C(31) 1.503(6) yes . .
C(19) C(20) 1.398(6) yes . .
C(20) C(27) 1.529(6) yes . .
C(21) C(22) 1.530(5) yes . .
C(21) C(23) 1.538(6) yes . .
C(21) C(24) 1.547(5) yes . .
C(27) C(28) 1.541(6) yes . .
C(27) C(29) 1.542(7) yes . .
C(27) C(30) 1.546(6) yes . .
C(33) C(34) 1.485(5) yes . .
C(34) C(35) 1.395(5) yes . .
C(34) C(39) 1.407(6) yes . .
C(35) C(36) 1.386(6) yes . .
C(36) C(37) 1.372(6) yes . .
C(37) C(38) 1.377(6) yes . .
C(38) C(39) 1.379(6) yes . .
C(40) C(41) 1.498(5) yes . .
C(41) C(42) 1.388(6) yes . .
C(41) C(46) 1.405(6) yes . .
C(42) C(43) 1.377(6) yes . .
C(43) C(44) 1.387(6) yes . .
C(44) C(45) 1.382(6) yes . .
C(45) C(46) 1.376(6) yes . .
C(47) C(48) 1.423 yes . .
C(47) C(52) 1.369 yes . .
C(47) C(53) 1.460 yes . .
C(48) C(49) 1.189 yes . .
C(49) C(50) 1.534 yes . .
C(50) C(51) 1.226 yes . .
C(51) C(52) 1.347 yes . .

loop_
_geom_angle_atom_site_label_1
_geom_angle_atom_site_label_2
_geom_angle_atom_site_label_3
_geom_angle
_geom_angle_publ_flag
_geom_angle_site_symmetry_1
_geom_angle_site_symmetry_2
_geom_angle_site_symmetry_3
O(1) Zr(1) O(2) 77.05(10) yes . . .
O(1) Zr(1) O(3) 154.60(11) yes . . .
O(1) Zr(1) C(33) 103.45(12) yes . . .
O(1) Zr(1) C(40) 91.34(13) yes . . .
O(2) Zr(1) O(3) 81.85(10) yes . . .
O(2) Zr(1) C(33) 116.50(12) yes . . .
O(2) Zr(1) C(40) 136.82(12) yes . . .
O(3) Zr(1) C(33) 98.51(13) yes . . .
O(3) Zr(1) C(40) 94.51(12) yes . . .
C(33) Zr(1) C(40) 106.61(15) yes . . .
Zr(1) O(1) C(1) 146.2(2) yes . . .
Zr(1) O(2) C(8) 118.5(2) yes . . .
Zr(1) O(2) C(32) 126.5(2) yes . . .
C(8) O(2) C(32) 114.9(3) yes . . .
Zr(1) O(3) C(15) 172.1(2) yes . . .
O(1) C(1) C(2) 120.4(3) yes . . .
O(1) C(1) C(6) 119.3(3) yes . . .
C(2) C(1) C(6) 120.2(3) yes . . .
C(1) C(2) C(3) 117.2(3) yes . . .
C(1) C(2) C(21) 121.8(3) yes . . .
C(3) C(2) C(21) 120.9(3) yes . . .
C(2) C(3) C(4) 123.0(3) yes . . .
C(3) C(4) C(5) 118.0(4) yes . . .
C(3) C(4) C(25) 120.2(3) yes . . .
C(5) C(4) C(25) 121.8(3) yes . . .
C(4) C(5) C(6) 122.3(3) yes . . .
C(1) C(6) C(5) 119.0(3) yes . . .
C(1) C(6) C(7) 122.2(3) yes . . .
C(5) C(6) C(7) 118.6(3) yes . . .
C(6) C(7) C(9) 119.4(3) yes . . .
O(2) C(8) C(9) 118.8(3) yes . . .
O(2) C(8) C(13) 117.9(3) yes . . .
C(9) C(8) C(13) 123.2(3) yes . . .
C(7) C(9) C(8) 120.8(3) yes . . .
C(7) C(9) C(10) 122.3(3) yes . . .
C(8) C(9) C(10) 116.7(3) yes . . .
C(9) C(10) C(11) 122.1(3) yes . . .
C(10) C(11) C(12) 118.6(4) yes . . .
C(10) C(11) C(26) 120.7(4) yes . . .
C(12) C(11) C(26) 120.7(4) yes . . .
C(11) C(12) C(13) 121.3(4) yes . . .
C(8) C(13) C(12) 117.3(3) yes . . .
C(8) C(13) C(14) 119.8(3) yes . . .
C(12) C(13) C(14) 122.5(3) yes . . .
C(13) C(14) C(16) 111.2(3) yes . . .
O(3) C(15) C(16) 119.3(3) yes . . .
O(3) C(15) C(20) 121.2(3) yes . . .
C(16) C(15) C(20) 119.5(3) yes . . .
C(14) C(16) C(15) 122.3(3) yes . . .
C(14) C(16) C(17) 118.3(3) yes . . .
C(15) C(16) C(17) 119.4(4) yes . . .
C(16) C(17) C(18) 122.1(4) yes . . .
C(17) C(18) C(19) 117.9(4) yes . . .
C(17) C(18) C(31) 121.7(4) yes . . .
C(19) C(18) C(31) 120.4(4) yes . . .
C(18) C(19) C(20) 123.9(4) yes . . .
C(15) C(20) C(19) 117.1(4) yes . . .
C(15) C(20) C(27) 122.4(3) yes . . .
C(19) C(20) C(27) 120.4(4) yes . . .
C(2) C(21) C(22) 110.6(3) yes . . .
C(2) C(21) C(23) 110.3(3) yes . . .
C(2) C(21) C(24) 111.7(3) yes . . .
C(22) C(21) C(23) 109.6(3) yes . . .
C(22) C(21) C(24) 108.1(3) yes . . .
C(23) C(21) C(24) 106.4(3) yes . . .
C(20) C(27) C(28) 107.8(3) yes . . .
C(20) C(27) C(29) 112.7(3) yes . . .
C(20) C(27) C(30) 110.9(3) yes . . .
C(28) C(27) C(29) 107.4(3) yes . . .
C(28) C(27) C(30) 111.8(3) yes . . .
C(29) C(27) C(30) 106.2(4) yes . . .
Zr(1) C(33) C(34) 104.5(2) yes . . .
C(33) C(34) C(35) 121.8(3) yes . . .
C(33) C(34) C(39) 121.7(3) yes . . .
C(35) C(34) C(39) 116.4(3) yes . . .
C(34) C(35) C(36) 121.7(3) yes . . .
C(35) C(36) C(37) 120.9(4) yes . . .
C(36) C(37) C(38) 118.4(4) yes . . .
C(37) C(38) C(39) 121.5(4) yes . . .
C(34) C(39) C(38) 121.1(3) yes . . .
Zr(1) C(40) C(41) 114.4(2) yes . . .
C(40) C(41) C(42) 120.7(3) yes . . .
C(40) C(41) C(46) 121.7(3) yes . . .
C(42) C(41) C(46) 117.5(3) yes . . .
C(41) C(42) C(43) 121.4(4) yes . . .
C(42) C(43) C(44) 120.6(4) yes . . .
C(43) C(44) C(45) 118.7(4) yes . . .
C(44) C(45) C(46) 120.9(4) yes . . .
C(41) C(46) C(45) 120.8(4) yes . . .
C(48) C(47) C(52) 109.2 yes . . .
C(48) C(47) C(53) 128.0 yes . . .
C(52) C(47) C(53) 122.8 yes . . .
C(47) C(48) C(49) 129.4 yes . . .
C(48) C(49) C(50) 121.8 yes . . .
C(49) C(50) C(51) 103.5 yes . . .
C(50) C(51) C(52) 137.5 yes . . .
C(47) C(52) C(51) 117.2 yes . . .

loop_
_geom_torsion_atom_site_label_1
_geom_torsion_atom_site_label_2
_geom_torsion_atom_site_label_3
_geom_torsion_atom_site_label_4
_geom_torsion
_geom_torsion_publ_flag
_geom_torsion_site_symmetry_1
_geom_torsion_site_symmetry_2
_geom_torsion_site_symmetry_3
_geom_torsion_site_symmetry_4
O(1) Zr(1) O(2) C(8) 112.5(2) ? . . . .
O(1) Zr(1) O(2) C(32) -62.9(2) ? . . . .
O(2) Zr(1) O(1) C(1) -22.2(3) ? . . . .
O(1) Zr(1) O(3) C(15) -70.9(18) ? . . . .
O(3) Zr(1) O(1) C(1) 12.3(5) ? . . . .
O(1) Zr(1) C(33) C(34) 94.7(2) ? . . . .
C(33) Zr(1) O(1) C(1) -136.8(3) ? . . . .
O(1) Zr(1) C(40) C(41) 36.0(3) ? . . . .
C(40) Zr(1) O(1) C(1) 115.8(3) ? . . . .
O(2) Zr(1) O(3) C(15) -37.0(18) ? . . . .
O(3) Zr(1) O(2) C(8) -53.3(2) ? . . . .
O(3) Zr(1) O(2) C(32) 131.3(2) ? . . . .
O(2) Zr(1) C(33) C(34) 12.6(3) ? . . . .
C(33) Zr(1) O(2) C(8) -148.8(2) ? . . . .
C(33) Zr(1) O(2) C(32) 35.9(3) ? . . . .
O(2) Zr(1) C(40) C(41) 108.4(3) ? . . . .
C(40) Zr(1) O(2) C(8) 34.6(3) ? . . . .
C(40) Zr(1) O(2) C(32) -140.8(2) ? . . . .
O(3) Zr(1) C(33) C(34) -72.5(2) ? . . . .
C(33) Zr(1) O(3) C(15) 78.8(18) ? . . . .
O(3) Zr(1) C(40) C(41) -168.7(3) ? . . . .
C(40) Zr(1) O(3) C(15) -173.7(18) ? . . . .
C(33) Zr(1) C(40) C(41) -68.4(3) ? . . . .
C(40) Zr(1) C(33) C(34) -169.8(2) ? . . . .
Zr(1) O(1) C(1) C(2) 146.5(3) ? . . . .
Zr(1) O(1) C(1) C(6) -32.7(5) ? . . . .
Zr(1) O(2) C(8) C(9) -74.8(4) ? . . . .
Zr(1) O(2) C(8) C(13) 101.9(3) ? . . . .
C(32) O(2) C(8) C(9) 101.1(4) ? . . . .
C(32) O(2) C(8) C(13) -82.2(4) ? . . . .
Zr(1) O(3) C(15) C(16) 23(2) ? . . . .
Zr(1) O(3) C(15) C(20) -156.9(16) ? . . . .
O(1) C(1) C(2) C(3) -174.3(3) ? . . . .
O(1) C(1) C(2) C(21) 8.5(5) ? . . . .
O(1) C(1) C(6) C(5) 174.4(3) ? . . . .
O(1) C(1) C(6) C(7) -9.9(5) ? . . . .
C(2) C(1) C(6) C(5) -4.8(5) ? . . . .
C(2) C(1) C(6) C(7) 170.9(3) ? . . . .
C(6) C(1) C(2) C(3) 4.9(5) ? . . . .
C(6) C(1) C(2) C(21) -172.3(3) ? . . . .
C(1) C(2) C(3) C(4) -1.0(5) ? . . . .
C(1) C(2) C(21) C(22) -64.0(4) ? . . . .
C(1) C(2) C(21) C(23) 57.4(4) ? . . . .
C(1) C(2) C(21) C(24) 175.6(3) ? . . . .
C(3) C(2) C(21) C(22) 118.9(4) ? . . . .
C(3) C(2) C(21) C(23) -119.6(4) ? . . . .
C(3) C(2) C(21) C(24) -1.5(5) ? . . . .
C(21) C(2) C(3) C(4) 176.2(3) ? . . . .
C(2) C(3) C(4) C(5) -3.0(6) ? . . . .
C(2) C(3) C(4) C(25) 179.8(3) ? . . . .
C(3) C(4) C(5) C(6) 3.1(6) ? . . . .
C(25) C(4) C(5) C(6) -179.7(3) ? . . . .
C(4) C(5) C(6) C(1) 0.7(6) ? . . . .
C(4) C(5) C(6) C(7) -175.2(3) ? . . . .
C(1) C(6) C(7) C(9) 102.3(4) ? . . . .
C(5) C(6) C(7) C(9) -81.9(4) ? . . . .
C(6) C(7) C(9) C(8) -61.4(5) ? . . . .
C(6) C(7) C(9) C(10) 124.0(4) ? . . . .
O(2) C(8) C(9) C(7) 10.7(5) ? . . . .
O(2) C(8) C(9) C(10) -174.4(3) ? . . . .
O(2) C(8) C(13) C(12) 174.1(3) ? . . . .
O(2) C(8) C(13) C(14) -13.3(5) ? . . . .
C(9) C(8) C(13) C(12) -9.4(6) ? . . . .
C(9) C(8) C(13) C(14) 163.2(3) ? . . . .
C(13) C(8) C(9) C(7) -165.8(4) ? . . . .
C(13) C(8) C(9) C(10) 9.1(6) ? . . . .
C(7) C(9) C(10) C(11) 173.5(4) ? . . . .
C(8) C(9) C(10) C(11) -1.4(6) ? . . . .
C(9) C(10) C(11) C(12) -5.6(7) ? . . . .
C(9) C(10) C(11) C(26) 176.2(4) ? . . . .
C(10) C(11) C(12) C(13) 5.4(7) ? . . . .
C(26) C(11) C(12) C(13) -176.4(4) ? . . . .
C(11) C(12) C(13) C(8) 1.8(6) ? . . . .
C(11) C(12) C(13) C(14) -170.6(4) ? . . . .
C(8) C(13) C(14) C(16) -98.7(4) ? . . . .
C(12) C(13) C(14) C(16) 73.5(5) ? . . . .
C(13) C(14) C(16) C(15) 70.3(4) ? . . . .
C(13) C(14) C(16) C(17) -106.8(4) ? . . . .
O(3) C(15) C(16) C(14) 2.5(5) ? . . . .
O(3) C(15) C(16) C(17) 179.6(3) ? . . . .
O(3) C(15) C(20) C(19) -179.5(3) ? . . . .
O(3) C(15) C(20) C(27) -3.1(5) ? . . . .
C(16) C(15) C(20) C(19) 1.0(5) ? . . . .
C(16) C(15) C(20) C(27) 177.3(3) ? . . . .
C(20) C(15) C(16) C(14) -178.0(3) ? . . . .
C(20) C(15) C(16) C(17) -0.9(5) ? . . . .
C(14) C(16) C(17) C(18) 176.0(3) ? . . . .
C(15) C(16) C(17) C(18) -1.2(5) ? . . . .
C(16) C(17) C(18) C(19) 3.1(6) ? . . . .
C(16) C(17) C(18) C(31) -177.7(3) ? . . . .
C(17) C(18) C(19) C(20) -3.0(6) ? . . . .
C(31) C(18) C(19) C(20) 177.7(3) ? . . . .
C(18) C(19) C(20) C(15) 1.0(6) ? . . . .
C(18) C(19) C(20) C(27) -175.4(3) ? . . . .
C(15) C(20) C(27) C(28) -64.4(4) ? . . . .
C(15) C(20) C(27) C(29) 177.2(3) ? . . . .
C(15) C(20) C(27) C(30) 58.3(5) ? . . . .
C(19) C(20) C(27) C(28) 111.8(4) ? . . . .
C(19) C(20) C(27) C(29) -6.5(5) ? . . . .
C(19) C(20) C(27) C(30) -125.4(4) ? . . . .
Zr(1) C(33) C(34) C(35) -106.0(3) ? . . . .
Zr(1) C(33) C(34) C(39) 70.5(4) ? . . . .
C(33) C(34) C(35) C(36) 175.1(3) ? . . . .
C(33) C(34) C(39) C(38) -174.7(3) ? . . . .
C(35) C(34) C(39) C(38) 2.0(6) ? . . . .
C(39) C(34) C(35) C(36) -1.6(6) ? . . . .
C(34) C(35) C(36) C(37) 0.2(5) ? . . . .
C(35) C(36) C(37) C(38) 0.8(6) ? . . . .
C(36) C(37) C(38) C(39) -0.3(5) ? . . . .
C(37) C(38) C(39) C(34) -1.1(6) ? . . . .
Zr(1) C(40) C(41) C(42) 78.4(4) ? . . . .
Zr(1) C(40) C(41) C(46) -102.0(3) ? . . . .
C(40) C(41) C(42) C(43) 178.6(3) ? . . . .
C(40) C(41) C(46) C(45) -178.0(3) ? . . . .
C(42) C(41) C(46) C(45) 1.6(5) ? . . . .
C(46) C(41) C(42) C(43) -1.1(5) ? . . . .
C(41) C(42) C(43) C(44) -0.2(5) ? . . . .
C(42) C(43) C(44) C(45) 0.9(6) ? . . . .
C(43) C(44) C(45) C(46) -0.4(6) ? . . . .
C(44) C(45) C(46) C(41) -0.9(6) ? . . . .
C(48) C(47) C(52) C(51) 3.8 ? . . . .
C(52) C(47) C(48) C(49) -8.1 ? . . . .
C(53) C(47) C(48) C(49) 169.8 ? . . . .
C(53) C(47) C(52) C(51) -174.2 ? . . . .
C(47) C(48) C(49) C(50) 2.2 ? . . . .
C(48) C(49) C(50) C(51) 7.6 ? . . . .
C(49) C(50) C(51) C(52) -13.9 ? . . . .
C(50) C(51) C(52) C(47) 8.8 ? . . . .

loop_
_geom_contact_atom_site_label_1
_geom_contact_atom_site_label_2
_geom_contact_distance
_geom_contact_publ_flag
_geom_contact_site_symmetry_1
_geom_contact_site_symmetry_2
C(4) C(4) 3.567(5) ? . 2_756
C(12) C(26) 3.593(7) ? . 2_755
C(26) C(12) 3.593(7) ? . 2_755
C(32) C(41) 3.376(5) ? . 1_655
C(32) C(42) 3.315(5) ? . 1_655
C(32) C(43) 3.530(5) ? . 1_655
C(41) C(32) 3.376(5) ? . 1_455
C(42) C(32) 3.315(5) ? . 1_455
C(43) C(32) 3.530(5) ? . 1_455


#==============================================================================

# Additional structures and associated data_? identifiers
# should be added at this point if there is more than one 
# structure analysis in the CIF.

#==============================================================================

#     End of CIF

#==============================================================================
#===END
data_General
_publ_requested_journal          'Inorganic Chemistry'

#==============================================================================

# SUBMISSION DETAILS

_publ_contact_author_name        'Hiroyuki Kawaguchi'
_publ_contact_author_email       hkawa@ims.ac.jp
_publ_contact_author_phone       'ENTER PHONE NUMBER'
_publ_contact_author_fax         'ENTER FAX NUMBER'
loop_
_publ_author_name
_publ_author_address
'Matsuo, Tsukasa'
;
  FIRST AUTHORS ADDRESS
;
_audit_creation_date             2007-05-28
_audit_creation_method           'by CrystalStructure 3.8'
_audit_update_record             ?

#==============================================================================

# PROCESSING SUMMARY (IUCr Office Use Only)

_journal_date_recd_electronic    ?
_journal_date_from_coeditor      ?
_journal_date_accepted           ?
_journal_coeditor_code           ?
_publ_contact_letter             
;
    ENTER TEXT OF LETTER
;
_publ_requested_category         FM
_publ_requested_coeditor_name    ?

#==============================================================================

# TITLE AND AUTHOR LIST

_publ_section_title              
;
    ENTER SECTION TITLE
;
_publ_section_title_footnote     
;
    ENTER FOOTNOTE TO TITLE OF PAPER
;
loop_
_publ_author_footnote
;
  FIRST AUTHORS FOOTNOTES
;
_publ_section_synopsis           
;
  ENTER SYNOPSIS
;

#==============================================================================

# TEXT

_publ_section_abstract           
;
    ENTER ABSTRACT
;
_publ_section_comment            
;
    ENTER TEXT
;
_publ_section_references         
;
    ENTER OTHER REFERENCES

    Rigaku/MSC and Rigaku Corporation. (2006).
    CrystalStructure (Version 3.8). 
    Single Crystal Structure Analysis Software.
    Rigaku/MSC, 9009 TX, USA 77381-5209.
    Rigaku, Tokyo 196-8666, Japan.

    Carruthers, J.R., Rollett,J.S., Betteridge, P.W.,
  Kinna, D., Pearce, L., Larsen, A., and Gabe, E.(1999)
    CRYSTALS Issue 11, Chemical Crystallography Laboratory, Oxford, UK.

;
_publ_section_figure_captions    
;
    ENTER FIGURE CAPTIONS
;
_publ_section_exptl_prep         
;
    ENTER COMPOUND PREPARATION DETAILS
;
_publ_section_exptl_refinement   
;
    ENTER SPECIAL DETAILS OF THE REFINEMENT
;

#==============================================================================

data___[MeO2O]Zr(CH2SiMe3)2

#==============================================================================

# CHEMICAL DATA

_chemical_formula_sum                  'C50 H76 O3 Si2 Zr '
_chemical_formula_moiety               'C50 H76 O3 Si2 Zr '
_chemical_formula_weight               872.54
_chemical_melting_point                ?

#==============================================================================

# CRYSTAL DATA
_symmetry_cell_setting                 monoclinic
_symmetry_space_group_name_H-M        'P 1 21/n 1'
_symmetry_space_group_name_Hall       '-P 2yn'
_symmetry_Int_Tables_number            14
loop_
_symmetry_equiv_pos_site_id
_symmetry_equiv_pos_as_xyz
1   '+X,+Y,+Z'
2   '1/2-X,1/2+Y,1/2-Z'
3   '-X,-Y,-Z'
4   '1/2+X,1/2-Y,1/2+Z'

#------------------------------------------------------------------------------

_cell_length_a                         11.453(6)
_cell_length_b                         18.622(9)
_cell_length_c                         24.540(13)
_cell_angle_alpha                      90.0000
_cell_angle_beta                       104.754(7)
_cell_angle_gamma                      90.0000
_cell_volume                           5061(4)
_cell_formula_units_Z                  4
_cell_measurement_reflns_used          10767
_cell_measurement_theta_min            3.0
_cell_measurement_theta_max            27.5
_cell_measurement_temperature          173.1

#------------------------------------------------------------------------------

_exptl_crystal_description            'prism'
_exptl_crystal_colour                 'colorless'
_exptl_crystal_size_max                0.22
_exptl_crystal_size_mid                0.16
_exptl_crystal_size_min                0.08
_exptl_crystal_density_diffrn          1.145
_exptl_crystal_density_meas            ?
_exptl_crystal_density_method         'not measured'
_exptl_crystal_F_000                   1872.00
_exptl_absorpt_coefficient_mu          0.301
_exptl_absorpt_correction_type         none

#==============================================================================

# EXPERIMENTAL DATA

_diffrn_radiation_type                'Mo K\a'
_diffrn_radiation_wavelength           0.71070
_diffrn_measurement_device_type       'Rigaku Mercury'
_diffrn_measurement_method             \w
_diffrn_detector_area_resol_mean       7.31
_diffrn_reflns_number                  39998
_diffrn_reflns_av_R_equivalents        0.062
_diffrn_reflns_theta_max               27.48
_diffrn_measured_fraction_theta_max    0.989
_diffrn_reflns_theta_full              27.50
_diffrn_measured_fraction_theta_full   0.988
_diffrn_reflns_limit_h_min             -14
_diffrn_reflns_limit_h_max             14
_diffrn_reflns_limit_k_min             -23
_diffrn_reflns_limit_k_max             22
_diffrn_reflns_limit_l_min             -31
_diffrn_reflns_limit_l_max             31

#==============================================================================

# REFINEMENT DATA

_refine_special_details
;
    Refinement was performed using all reflections. The weighted 
    R-factor (wR) and goodness of fit (S) are based on F^2^.
    R-factor (gt) are based on F. The threshold expression of
    F^2^ > 2.0 sigma(F^2^) is used only for calculating R-factor (gt).
;
_reflns_number_total                   11485
_reflns_number_gt                      11485
_reflns_threshold_expression           F^2^>2.0\s(F^2^)
_refine_ls_structure_factor_coef       Fsqd
_refine_ls_R_factor_gt                 0.0883
_refine_ls_wR_factor_ref               0.1933
_refine_ls_hydrogen_treatment          refall
_refine_ls_number_reflns               39998
_refine_ls_number_parameters           542
_refine_ls_goodness_of_fit_ref         1.039
_refine_ls_weighting_scheme            calc
_refine_ls_weighting_details
'w = 1/[2.5000\s(Fo^2^)]/(4Fo^2^)'
_refine_ls_shift/su_max                0.0000
_refine_diff_density_max               6.64
_refine_diff_density_min               -3.10
_refine_ls_extinction_method           none
_refine_ls_extinction_coef             ?

loop_
_atom_type_symbol
_atom_type_description
_atom_type_scat_dispersion_real
_atom_type_scat_dispersion_imag
_atom_type_scat_source
  'C' 'C'  0.003 0.002 
;
International Tables for Crystallography
(1992, Vol. C, Tables 4.2.6.8 and 6.1.1.4)
;
  'H' 'H'  0.000 0.000 
;
International Tables for Crystallography
(1992, Vol. C, Table 6.1.1.4)
;
  'O' 'O'  0.011 0.006 
;
International Tables for Crystallography
(1992, Vol. C, Tables 4.2.6.8 and 6.1.1.4)
;
  'Si' 'Si'  0.082 0.070 
;
International Tables for Crystallography
(1992, Vol. C, Tables 4.2.6.8 and 6.1.1.4)
;
  'Zr' 'Zr'  -2.967 0.560 
;
International Tables for Crystallography
(1992, Vol. C, Tables 4.2.6.8 and 6.1.1.4)
;

#==============================================================================

# ATOMIC COORDINATES AND THERMAL PARAMETERS

loop_
_atom_site_label
_atom_site_type_symbol
_atom_site_fract_x
_atom_site_fract_y
_atom_site_fract_z
_atom_site_U_iso_or_equiv
_atom_site_adp_type
_atom_site_occupancy
_atom_site_symmetry_multiplicity
_atom_site_calc_flag
_atom_site_refinement_flags
_atom_site_disorder_assembly
_atom_site_disorder_group
 Zr(1) Zr 0.18095(2) 0.263130(10) 0.068430(10) 0.01917(5) Uani 1.00 1 d . . .
 Si(1) Si 0.13978(7) 0.44013(4) 0.11981(3) 0.0321(2) Uani 1.00 1 d . . .
 Si(2) Si 0.35270(7) 0.12346(4) 0.15831(3) 0.0309(2) Uani 1.00 1 d . . .
 O(1) O 0.24802(14) 0.31413(8) 0.01113(6) 0.0211(4) Uani 1.00 1 d . . .
 O(2) O 0.01320(14) 0.25765(8) -0.00448(6) 0.0216(4) Uani 1.00 1 d . . .
 O(3) O 0.06532(14) 0.20252(8) 0.09791(7) 0.0232(4) Uani 1.00 1 d . . .
 C(1) C 0.2817(2) 0.35049(11) -0.03115(10) 0.0202(6) Uani 1.00 1 d . . .
 C(2) C 0.4027(2) 0.37234(12) -0.02565(10) 0.0235(6) Uani 1.00 1 d . . .
 C(3) C 0.4259(2) 0.41032(13) -0.07087(11) 0.0293(7) Uani 1.00 1 d . . .
 C(4) C 0.3401(2) 0.42503(13) -0.12091(11) 0.0332(7) Uani 1.00 1 d . . .
 C(5) C 0.2232(2) 0.40288(12) -0.12475(10) 0.0307(7) Uani 1.00 1 d . . .
 C(6) C 0.1928(2) 0.36599(11) -0.08133(10) 0.0237(6) Uani 1.00 1 d . . .
 C(7) C 0.0632(2) 0.34062(12) -0.09111(10) 0.0256(6) Uani 1.00 1 d . . .
 C(8) C 0.0339(2) 0.21999(12) -0.05142(9) 0.0212(6) Uani 1.00 1 d . . .
 C(9) C 0.0538(2) 0.25946(12) -0.09550(9) 0.0216(5) Uani 1.00 1 d . . .
 C(10) C 0.0740(2) 0.22284(13) -0.14157(10) 0.0270(6) Uani 1.00 1 d . . .
 C(11) C 0.0736(2) 0.14789(13) -0.14398(10) 0.0275(7) Uani 1.00 1 d . . .
 C(12) C 0.0594(2) 0.11103(13) -0.09571(11) 0.0277(7) Uani 1.00 1 d . . .
 C(13) C 0.0417(2) 0.14574(12) -0.04867(10) 0.0245(6) Uani 1.00 1 d . . .
 C(14) C 0.0462(2) 0.10524(12) 0.00554(10) 0.0267(7) Uani 1.00 1 d . . .
 C(15) C -0.0370(2) 0.16173(12) 0.08260(10) 0.0230(6) Uani 1.00 1 d . . .
 C(16) C -0.0537(2) 0.11783(12) 0.03491(10) 0.0240(6) Uani 1.00 1 d . . .
 C(17) C -0.1633(2) 0.08189(13) 0.01499(11) 0.0345(7) Uani 1.00 1 d . . .
 C(18) C -0.2554(2) 0.08796(15) 0.04230(12) 0.0394(8) Uani 1.00 1 d . . .
 C(19) C -0.2326(2) 0.12774(14) 0.09117(12) 0.0346(7) Uani 1.00 1 d . . .
 C(20) C -0.1256(2) 0.16545(12) 0.11361(10) 0.0234(6) Uani 1.00 1 d . . .
 C(21) C 0.5089(2) 0.35224(13) 0.02409(11) 0.0298(7) Uani 1.00 1 d . . .
 C(22) C 0.5279(2) 0.27065(14) 0.02288(13) 0.0417(8) Uani 1.00 1 d . . .
 C(23) C 0.4877(2) 0.37461(15) 0.08037(11) 0.0397(8) Uani 1.00 1 d . . .
 C(24) C 0.6284(2) 0.38760(17) 0.02038(14) 0.0501(9) Uani 1.00 1 d . . .
 C(25) C 0.3702(3) 0.46318(17) -0.16982(12) 0.0551(10) Uani 1.00 1 d . . .
 C(26) C 0.0863(2) 0.10610(13) -0.19588(11) 0.0351(8) Uani 1.00 1 d . . .
 C(27) C -0.0359(3) 0.0751(2) -0.22412(15) 0.0894(15) Uani 1.00 1 d . . .
 C(28) C 0.1761(3) 0.04514(17) -0.17806(14) 0.0741(13) Uani 1.00 1 d . . .
 C(29) C 0.1263(4) 0.15136(17) -0.23748(14) 0.0732(13) Uani 1.00 1 d . . .
 C(30) C -0.1067(2) 0.20726(14) 0.16848(11) 0.0307(7) Uani 1.00 1 d . . .
 C(31) C -0.2104(2) 0.19566(17) 0.19678(13) 0.0487(10) Uani 1.00 1 d . . .
 C(32) C 0.0105(2) 0.18311(17) 0.21040(11) 0.0476(9) Uani 1.00 1 d . . .
 C(33) C -0.1012(2) 0.28796(14) 0.15803(12) 0.0425(8) Uani 1.00 1 d . . .
 C(34) C -0.3731(3) 0.0493(2) 0.01958(16) 0.0760(13) Uani 1.00 1 d . . .
 C(35) C -0.1127(2) 0.27513(13) -0.00935(11) 0.0307(7) Uani 1.00 1 d . . .
 C(36) C 0.2052(2) 0.34833(12) 0.13354(10) 0.0267(6) Uani 1.00 1 d . . .
 C(37) C -0.0117(2) 0.43970(16) 0.06899(14) 0.0532(10) Uani 1.00 1 d . . .
 C(38) C 0.1230(3) 0.48068(18) 0.18674(14) 0.0787(13) Uani 1.00 1 d . . .
 C(39) C 0.2375(3) 0.49728(16) 0.08728(19) 0.0803(13) Uani 1.00 1 d . . .
 C(40) C 0.3342(2) 0.18603(12) 0.09740(11) 0.0279(7) Uani 1.00 1 d . . .
 C(41) C 0.2297(2) 0.05614(14) 0.14784(12) 0.0389(8) Uani 1.00 1 d . . .
 C(42) C 0.3602(3) 0.17562(16) 0.22338(13) 0.0576(10) Uani 1.00 1 d . . .
 C(43) C 0.4957(2) 0.07083(17) 0.16895(16) 0.0656(12) Uani 1.00 1 d . . .
 C(44) C -0.4733(5) 0.2170(3) -0.1336(2) 0.131(2) Uiso 1.00 1 d . . .
 C(45) C -0.4291(8) 0.1443(4) -0.1404(3) 0.178(2) Uiso 1.00 1 d . . .
 C(46) C -0.3197(6) 0.1496(3) -0.1550(2) 0.150(2) Uiso 1.00 1 d . . .
 C(47) C -0.2581(4) 0.2129(2) -0.1605(2) 0.0966(14) Uiso 1.00 1 d . . .
 C(48) C -0.3060(5) 0.2777(2) -0.1496(2) 0.1144(17) Uiso 1.00 1 d . . .
 C(49) C -0.4171(4) 0.2734(2) -0.1356(2) 0.0927(13) Uiso 1.00 1 d . . .
 C(50) C -0.5573(12) 0.1565(7) -0.1080(5) 0.154(4) Uiso 0.50 1 d P . .
 C(51) C -0.6015(9) 0.2231(5) -0.1244(4) 0.099(2) Uiso 0.50 1 d P . .
 H(1) H 0.5076 0.4271 -0.0673 0.036 Uiso 1.00 1 c R . .
 H(2) H 0.1613 0.4128 -0.1591 0.036 Uiso 1.00 1 c R . .
 H(3) H 0.0326 0.3561 -0.0596 0.029 Uiso 1.00 1 c R . .
 H(4) H 0.0150 0.3619 -0.1256 0.029 Uiso 1.00 1 c R . .
 H(5) H 0.0890 0.2499 -0.1728 0.032 Uiso 1.00 1 c R . .
 H(6) H 0.0656 0.0591 -0.0953 0.034 Uiso 1.00 1 c R . .
 H(7) H 0.0451 0.0544 -0.0032 0.033 Uiso 1.00 1 c R . .
 H(8) H 0.1220 0.1173 0.0321 0.033 Uiso 1.00 1 c R . .
 H(9) H -0.1755 0.0517 -0.0182 0.040 Uiso 1.00 1 c R . .
 H(10) H -0.2951 0.1303 0.1113 0.042 Uiso 1.00 1 c R . .
 H(11) H 0.4793 0.2463 0.0444 0.052 Uiso 1.00 1 c R . .
 H(12) H 0.6125 0.2598 0.0389 0.052 Uiso 1.00 1 c R . .
 H(13) H 0.5042 0.2544 -0.0159 0.052 Uiso 1.00 1 c R . .
 H(14) H 0.5194 0.4227 0.0893 0.048 Uiso 1.00 1 c R . .
 H(15) H 0.5270 0.3419 0.1102 0.048 Uiso 1.00 1 c R . .
 H(16) H 0.4014 0.3747 0.0770 0.048 Uiso 1.00 1 c R . .
 H(17) H 0.6700 0.3570 -0.0006 0.061 Uiso 1.00 1 c R . .
 H(18) H 0.6794 0.3951 0.0581 0.061 Uiso 1.00 1 c R . .
 H(19) H 0.6107 0.4335 0.0014 0.061 Uiso 1.00 1 c R . .
 H(20) H 0.3599 0.5144 -0.1656 0.067 Uiso 1.00 1 c R . .
 H(21) H 0.3172 0.4471 -0.2051 0.067 Uiso 1.00 1 c R . .
 H(22) H 0.4534 0.4533 -0.1698 0.067 Uiso 1.00 1 c R . .
 H(23) H -0.0440 0.0281 -0.2084 0.110 Uiso 1.00 1 c R . .
 H(24) H -0.0441 0.0707 -0.2643 0.110 Uiso 1.00 1 c R . .
 H(25) H -0.0984 0.1067 -0.2177 0.109 Uiso 1.00 1 c R . .
 H(26) H 0.2557 0.0629 -0.1782 0.093 Uiso 1.00 1 c R . .
 H(27) H 0.1553 0.0050 -0.2040 0.093 Uiso 1.00 1 c R . .
 H(28) H 0.1763 0.0294 -0.1404 0.093 Uiso 1.00 1 c R . .
 H(29) H 0.0577 0.1722 -0.2644 0.096 Uiso 1.00 1 c R . .
 H(30) H 0.1725 0.1221 -0.2572 0.096 Uiso 1.00 1 c R . .
 H(31) H 0.1772 0.1895 -0.2173 0.096 Uiso 1.00 1 c R . .
 H(32) H -0.2728 0.2314 0.1837 0.062 Uiso 1.00 1 c R . .
 H(33) H -0.1795 0.1997 0.2373 0.063 Uiso 1.00 1 c R . .
 H(34) H -0.2442 0.1481 0.1874 0.062 Uiso 1.00 1 c R . .
 H(35) H -0.0075 0.1436 0.2327 0.058 Uiso 1.00 1 c R . .
 H(36) H 0.0454 0.2225 0.2351 0.057 Uiso 1.00 1 c R . .
 H(37) H 0.0674 0.1672 0.1896 0.058 Uiso 1.00 1 c R . .
 H(38) H -0.0184 0.3022 0.1608 0.054 Uiso 1.00 1 c R . .
 H(39) H -0.1312 0.3134 0.1862 0.054 Uiso 1.00 1 c R . .
 H(40) H -0.1508 0.2996 0.1208 0.054 Uiso 1.00 1 c R . .
 H(41) H -0.4280 0.0809 -0.0063 0.091 Uiso 1.00 1 c R . .
 H(42) H -0.4062 0.0384 0.0513 0.091 Uiso 1.00 1 c R . .
 H(43) H -0.3628 0.0052 0.0003 0.091 Uiso 1.00 1 c R . .
 H(44) H -0.1547 0.2334 -0.0003 0.038 Uiso 1.00 1 c R . .
 H(45) H -0.1497 0.2900 -0.0477 0.038 Uiso 1.00 1 c R . .
 H(46) H -0.1177 0.3140 0.0163 0.038 Uiso 1.00 1 c R . .
 H(47) H 0.1726 0.3286 0.1632 0.033 Uiso 1.00 1 c R . .
 H(48) H 0.2917 0.3549 0.1476 0.033 Uiso 1.00 1 c R . .
 H(49) H -0.0024 0.4446 0.0310 0.061 Uiso 1.00 1 c R . .
 H(50) H -0.0592 0.4794 0.0772 0.061 Uiso 1.00 1 c R . .
 H(51) H -0.0523 0.3948 0.0723 0.061 Uiso 1.00 1 c R . .
 H(52) H 0.0434 0.4692 0.1913 0.090 Uiso 1.00 1 c R . .
 H(53) H 0.1313 0.5324 0.1847 0.090 Uiso 1.00 1 c R . .
 H(54) H 0.1840 0.4622 0.2186 0.090 Uiso 1.00 1 c R . .
 H(55) H 0.2976 0.5216 0.1165 0.099 Uiso 1.00 1 c R . .
 H(56) H 0.1872 0.5326 0.0632 0.098 Uiso 1.00 1 c R . .
 H(57) H 0.2775 0.4677 0.0650 0.099 Uiso 1.00 1 c R . .
 H(58) H 0.3329 0.1558 0.0651 0.034 Uiso 1.00 1 c R . .
 H(59) H 0.4067 0.2153 0.1058 0.034 Uiso 1.00 1 c R . .
 H(60) H 0.1641 0.0751 0.1619 0.049 Uiso 1.00 1 c R . .
 H(61) H 0.2598 0.0123 0.1679 0.048 Uiso 1.00 1 c R . .
 H(62) H 0.2007 0.0459 0.1079 0.048 Uiso 1.00 1 c R . .
 H(63) H 0.4431 0.1882 0.2418 0.066 Uiso 1.00 1 c R . .
 H(64) H 0.3268 0.1468 0.2487 0.066 Uiso 1.00 1 c R . .
 H(65) H 0.3128 0.2191 0.2136 0.065 Uiso 1.00 1 c R . .
 H(66) H 0.4786 0.0268 0.1472 0.081 Uiso 1.00 1 c R . .
 H(67) H 0.5256 0.0592 0.2086 0.081 Uiso 1.00 1 c R . .
 H(68) H 0.5562 0.0983 0.1566 0.081 Uiso 1.00 1 c R . .


loop_
_atom_site_aniso_label
_atom_site_aniso_U_11
_atom_site_aniso_U_22
_atom_site_aniso_U_33
_atom_site_aniso_U_12
_atom_site_aniso_U_13
_atom_site_aniso_U_23
 Zr(1) 0.02028(12) 0.02025(13) 0.01712(11) -0.00205(10) 0.00504(9) 0.00156(10)
 Si(1) 0.0340(4) 0.0261(3) 0.0342(4) -0.0020(3) 0.0053(3) -0.0043(3)
 Si(2) 0.0254(4) 0.0323(4) 0.0347(4) 0.0005(3) 0.0069(3) 0.0144(3)
 O(1) 0.0228(9) 0.0210(8) 0.0194(8) -0.0021(6) 0.0051(7) 0.0043(6)
 O(2) 0.0220(8) 0.0225(8) 0.0204(8) 0.0003(6) 0.0056(6) -0.0034(6)
 O(3) 0.0223(9) 0.0259(8) 0.0221(8) -0.0049(7) 0.0071(7) 0.0005(7)
 C(1) 0.0301(13) 0.0120(11) 0.0194(12) -0.0003(9) 0.0080(10) -0.0008(9)
 C(2) 0.0283(13) 0.0207(12) 0.0228(13) -0.0008(10) 0.0089(10) 0.0036(10)
 C(3) 0.0330(15) 0.0283(14) 0.0296(14) -0.0066(11) 0.0134(12) 0.0031(11)
 C(4) 0.0510(18) 0.0239(13) 0.0254(14) -0.0125(12) 0.0111(13) 0.0029(11)
 C(5) 0.0453(17) 0.0247(13) 0.0198(13) -0.0033(12) 0.0038(12) 0.0025(10)
 C(6) 0.0335(14) 0.0143(11) 0.0237(13) -0.0011(10) 0.0082(11) -0.0015(10)
 C(7) 0.0302(14) 0.0244(13) 0.0190(12) 0.0037(10) 0.0005(10) 0.0051(10)
 C(8) 0.0216(12) 0.0256(13) 0.0163(11) -0.0019(9) 0.0043(9) -0.0066(9)
 C(9) 0.0256(12) 0.0218(12) 0.0147(10) -0.0019(10) 0.0002(9) -0.0027(9)
 C(10) 0.0292(13) 0.0292(14) 0.0222(12) -0.0028(11) 0.0056(10) 0.0022(10)
 C(11) 0.0306(14) 0.0271(14) 0.0246(13) -0.0031(11) 0.0068(11) -0.0052(11)
 C(12) 0.0377(15) 0.0202(13) 0.0268(13) -0.0025(11) 0.0111(11) -0.0015(10)
 C(13) 0.0271(13) 0.0227(13) 0.0240(13) -0.0028(10) 0.0069(10) -0.0015(10)
 C(14) 0.0386(15) 0.0187(12) 0.0254(13) -0.0006(11) 0.0126(11) -0.0015(10)
 C(15) 0.0226(13) 0.0234(12) 0.0224(12) -0.0055(10) 0.0043(10) 0.0025(10)
 C(16) 0.0302(14) 0.0187(12) 0.0229(13) -0.0025(10) 0.0063(11) 0.0037(10)
 C(17) 0.0400(16) 0.0325(15) 0.0292(15) -0.0108(12) 0.0053(12) -0.0005(12)
 C(18) 0.0312(16) 0.0446(17) 0.0394(17) -0.0202(13) 0.0038(13) -0.0034(13)
 C(19) 0.0249(14) 0.0428(16) 0.0381(16) -0.0040(12) 0.0120(12) 0.0029(13)
 C(20) 0.0209(12) 0.0251(13) 0.0249(13) -0.0026(10) 0.0068(10) 0.0034(10)
 C(21) 0.0244(13) 0.0326(14) 0.0335(15) -0.0015(11) 0.0094(11) 0.0055(11)
 C(22) 0.0374(16) 0.0461(17) 0.0451(18) 0.0102(13) 0.0166(14) 0.0146(14)
 C(23) 0.0329(16) 0.0527(18) 0.0319(15) -0.0126(13) 0.0054(12) 0.0043(13)
 C(24) 0.0339(17) 0.068(2) 0.050(2) -0.0085(15) 0.0135(15) 0.0200(16)
 C(25) 0.069(2) 0.064(2) 0.0330(17) -0.0260(18) 0.0152(17) 0.0087(15)
 C(26) 0.0531(19) 0.0302(15) 0.0257(14) -0.0058(13) 0.0168(13) -0.0095(11)
 C(27) 0.083(3) 0.135(3) 0.055(2) -0.042(2) 0.027(2) -0.066(2)
 C(28) 0.129(3) 0.057(2) 0.046(2) 0.045(2) 0.040(2) -0.0002(17)
 C(29) 0.137(3) 0.056(2) 0.047(2) -0.000(2) 0.061(2) -0.0086(17)
 C(30) 0.0262(14) 0.0438(15) 0.0244(13) -0.0022(12) 0.0106(11) 0.0041(12)
 C(31) 0.0476(19) 0.067(2) 0.0399(18) 0.0010(15) 0.0277(15) -0.0039(15)
 C(32) 0.0417(18) 0.078(2) 0.0222(15) 0.0032(15) 0.0062(13) 0.0011(14)
 C(33) 0.0457(18) 0.0459(16) 0.0423(18) -0.0054(14) 0.0228(14) -0.0097(14)
 C(34) 0.049(2) 0.104(2) 0.075(2) -0.044(2) 0.014(2) -0.027(2)
 C(35) 0.0254(13) 0.0335(15) 0.0334(14) 0.0036(11) 0.0076(11) 0.0012(12)
 C(36) 0.0307(14) 0.0303(13) 0.0204(13) -0.0069(11) 0.0089(11) -0.0029(10)
 C(37) 0.047(2) 0.0399(17) 0.065(2) -0.0038(14) -0.0011(17) 0.0059(15)
 C(38) 0.108(3) 0.066(2) 0.051(2) 0.040(2) 0.000(2) -0.0254(18)
 C(39) 0.060(2) 0.0356(18) 0.150(4) 0.0022(17) 0.035(2) 0.031(2)
 C(40) 0.0264(14) 0.0256(13) 0.0331(14) -0.0037(10) 0.0103(11) 0.0062(11)
 C(41) 0.0404(17) 0.0346(15) 0.0433(17) 0.0006(12) 0.0137(14) 0.0111(13)
 C(42) 0.071(2) 0.056(2) 0.0349(18) -0.0196(17) -0.0059(17) 0.0106(15)
 C(43) 0.0385(19) 0.061(2) 0.101(3) 0.0151(16) 0.025(2) 0.043(2)

#==============================================================================

_computing_data_collection            'CrystalClear'
_computing_cell_refinement            'CrystalClear'
_computing_data_reduction             'CrystalStructure'
_computing_structure_solution         'SIR97'
_computing_structure_refinement       'CRYSTALS'
_computing_publication_material       'CrystalStructure 3.8'
_computing_molecular_graphics          ?

#==============================================================================

# MOLECULAR GEOMETRY

_geom_special_details
;
    ENTER SPECIAL DETAILS OF THE MOLECULAR GEOMETRY
;

loop_
_geom_bond_atom_site_label_1
_geom_bond_atom_site_label_2
_geom_bond_distance
_geom_bond_publ_flag
_geom_bond_site_symmetry_1
_geom_bond_site_symmetry_2
Zr(1) O(1) 2.0048(16) yes . .
Zr(1) O(2) 2.2698(13) yes . .
Zr(1) O(3) 2.0097(17) yes . .
Zr(1) C(36) 2.218(2) yes . .
Zr(1) C(40) 2.239(2) yes . .
Si(1) C(36) 1.862(2) yes . .
Si(1) C(37) 1.861(2) yes . .
Si(1) C(38) 1.862(3) yes . .
Si(1) C(39) 1.865(4) yes . .
Si(2) C(40) 1.864(2) yes . .
Si(2) C(41) 1.854(2) yes . .
Si(2) C(42) 1.852(3) yes . .
Si(2) C(43) 1.869(3) yes . .
O(1) C(1) 1.374(3) yes . .
O(2) C(8) 1.419(2) yes . .
O(2) C(35) 1.453(3) yes . .
O(3) C(15) 1.367(2) yes . .
C(1) C(2) 1.417(3) yes . .
C(1) C(6) 1.413(3) yes . .
C(2) C(3) 1.397(3) yes . .
C(2) C(21) 1.534(3) yes . .
C(3) C(4) 1.391(3) yes . .
C(4) C(5) 1.381(4) yes . .
C(4) C(25) 1.509(4) yes . .
C(5) C(6) 1.385(3) yes . .
C(6) C(7) 1.518(3) yes . .
C(7) C(9) 1.517(3) yes . .
C(8) C(9) 1.374(3) yes . .
C(8) C(13) 1.386(3) yes . .
C(9) C(10) 1.389(3) yes . .
C(10) C(11) 1.397(3) yes . .
C(11) C(12) 1.414(3) yes . .
C(11) C(26) 1.531(3) yes . .
C(12) C(13) 1.382(3) yes . .
C(13) C(14) 1.519(3) yes . .
C(14) C(16) 1.517(4) yes . .
C(15) C(16) 1.400(3) yes . .
C(15) C(20) 1.416(3) yes . .
C(16) C(17) 1.397(3) yes . .
C(17) C(18) 1.391(4) yes . .
C(18) C(19) 1.377(3) yes . .
C(18) C(34) 1.505(4) yes . .
C(19) C(20) 1.398(3) yes . .
C(20) C(30) 1.522(3) yes . .
C(21) C(22) 1.536(3) yes . .
C(21) C(23) 1.520(4) yes . .
C(21) C(24) 1.542(4) yes . .
C(26) C(27) 1.509(4) yes . .
C(26) C(28) 1.520(4) yes . .
C(26) C(29) 1.484(4) yes . .
C(30) C(31) 1.536(4) yes . .
C(30) C(32) 1.536(3) yes . .
C(30) C(33) 1.529(3) yes . .
C(44) C(45) 1.468(10) yes . .
C(44) C(49) 1.241(8) yes . .
C(44) C(50) 1.702(16) yes . .
C(44) C(51) 1.546(13) yes . .
C(45) C(46) 1.391(12) yes . .
C(46) C(47) 1.397(8) yes . .
C(47) C(48) 1.380(7) yes . .
C(48) C(49) 1.402(8) yes . .
C(50) C(51) 1.361(16) yes . .

loop_
_geom_angle_atom_site_label_1
_geom_angle_atom_site_label_2
_geom_angle_atom_site_label_3
_geom_angle
_geom_angle_publ_flag
_geom_angle_site_symmetry_1
_geom_angle_site_symmetry_2
_geom_angle_site_symmetry_3
O(1) Zr(1) O(2) 82.36(5) yes . . .
O(1) Zr(1) O(3) 157.49(5) yes . . .
O(1) Zr(1) C(36) 99.58(7) yes . . .
O(1) Zr(1) C(40) 96.73(8) yes . . .
O(2) Zr(1) O(3) 75.84(5) yes . . .
O(2) Zr(1) C(36) 121.70(7) yes . . .
O(2) Zr(1) C(40) 131.24(7) yes . . .
O(3) Zr(1) C(36) 96.63(8) yes . . .
O(3) Zr(1) C(40) 93.48(8) yes . . .
C(36) Zr(1) C(40) 106.61(8) yes . . .
C(36) Si(1) C(37) 112.37(12) yes . . .
C(36) Si(1) C(38) 109.87(13) yes . . .
C(36) Si(1) C(39) 110.11(14) yes . . .
C(37) Si(1) C(38) 107.74(17) yes . . .
C(37) Si(1) C(39) 105.91(15) yes . . .
C(38) Si(1) C(39) 110.76(17) yes . . .
C(40) Si(2) C(41) 112.60(11) yes . . .
C(40) Si(2) C(42) 109.53(12) yes . . .
C(40) Si(2) C(43) 110.89(15) yes . . .
C(41) Si(2) C(42) 109.93(15) yes . . .
C(41) Si(2) C(43) 105.81(13) yes . . .
C(42) Si(2) C(43) 107.93(15) yes . . .
Zr(1) O(1) C(1) 174.00(13) yes . . .
Zr(1) O(2) C(8) 112.30(12) yes . . .
Zr(1) O(2) C(35) 132.67(13) yes . . .
C(8) O(2) C(35) 114.28(16) yes . . .
Zr(1) O(3) C(15) 144.18(15) yes . . .
O(1) C(1) C(2) 121.69(18) yes . . .
O(1) C(1) C(6) 118.7(2) yes . . .
C(2) C(1) C(6) 119.6(2) yes . . .
C(1) C(2) C(3) 116.7(2) yes . . .
C(1) C(2) C(21) 124.3(2) yes . . .
C(3) C(2) C(21) 118.8(2) yes . . .
C(2) C(3) C(4) 124.5(2) yes . . .
C(3) C(4) C(5) 117.1(2) yes . . .
C(3) C(4) C(25) 122.8(2) yes . . .
C(5) C(4) C(25) 120.1(2) yes . . .
C(4) C(5) C(6) 121.7(2) yes . . .
C(1) C(6) C(5) 120.3(2) yes . . .
C(1) C(6) C(7) 122.2(2) yes . . .
C(5) C(6) C(7) 117.4(2) yes . . .
C(6) C(7) C(9) 111.72(19) yes . . .
O(2) C(8) C(9) 118.05(19) yes . . .
O(2) C(8) C(13) 118.4(2) yes . . .
C(9) C(8) C(13) 123.4(2) yes . . .
C(7) C(9) C(8) 120.0(2) yes . . .
C(7) C(9) C(10) 121.6(2) yes . . .
C(8) C(9) C(10) 118.3(2) yes . . .
C(9) C(10) C(11) 121.7(2) yes . . .
C(10) C(11) C(12) 116.7(2) yes . . .
C(10) C(11) C(26) 122.9(2) yes . . .
C(12) C(11) C(26) 120.4(2) yes . . .
C(11) C(12) C(13) 123.0(2) yes . . .
C(8) C(13) C(12) 116.6(2) yes . . .
C(8) C(13) C(14) 121.7(2) yes . . .
C(12) C(13) C(14) 121.3(2) yes . . .
C(13) C(14) C(16) 118.6(2) yes . . .
O(3) C(15) C(16) 118.6(2) yes . . .
O(3) C(15) C(20) 120.4(2) yes . . .
C(16) C(15) C(20) 120.9(2) yes . . .
C(14) C(16) C(15) 121.9(2) yes . . .
C(14) C(16) C(17) 118.6(2) yes . . .
C(15) C(16) C(17) 119.4(2) yes . . .
C(16) C(17) C(18) 121.1(2) yes . . .
C(17) C(18) C(19) 117.7(2) yes . . .
C(17) C(18) C(34) 120.1(2) yes . . .
C(19) C(18) C(34) 122.2(3) yes . . .
C(18) C(19) C(20) 124.5(2) yes . . .
C(15) C(20) C(19) 116.1(2) yes . . .
C(15) C(20) C(30) 122.7(2) yes . . .
C(19) C(20) C(30) 121.2(2) yes . . .
C(2) C(21) C(22) 108.26(19) yes . . .
C(2) C(21) C(23) 112.2(2) yes . . .
C(2) C(21) C(24) 112.6(2) yes . . .
C(22) C(21) C(23) 110.2(2) yes . . .
C(22) C(21) C(24) 106.8(2) yes . . .
C(23) C(21) C(24) 106.6(2) yes . . .
C(11) C(26) C(27) 107.6(2) yes . . .
C(11) C(26) C(28) 109.9(2) yes . . .
C(11) C(26) C(29) 113.3(2) yes . . .
C(27) C(26) C(28) 109.1(2) yes . . .
C(27) C(26) C(29) 108.3(2) yes . . .
C(28) C(26) C(29) 108.5(3) yes . . .
C(20) C(30) C(31) 112.1(2) yes . . .
C(20) C(30) C(32) 110.2(2) yes . . .
C(20) C(30) C(33) 110.9(2) yes . . .
C(31) C(30) C(32) 107.5(2) yes . . .
C(31) C(30) C(33) 106.5(2) yes . . .
C(32) C(30) C(33) 109.5(2) yes . . .
Zr(1) C(36) Si(1) 123.74(11) yes . . .
Zr(1) C(40) Si(2) 125.13(14) yes . . .
C(45) C(44) C(49) 125.4(7) yes . . .
C(45) C(44) C(50) 71.1(6) yes . . .
C(45) C(44) C(51) 116.9(6) yes . . .
C(49) C(44) C(50) 157.5(7) yes . . .
C(49) C(44) C(51) 117.7(6) yes . . .
C(50) C(44) C(51) 49.3(6) yes . . .
C(44) C(45) C(46) 108.8(6) yes . . .
C(45) C(46) C(47) 126.5(6) yes . . .
C(46) C(47) C(48) 118.9(5) yes . . .
C(47) C(48) C(49) 115.3(4) yes . . .
C(44) C(49) C(48) 124.8(5) yes . . .
C(44) C(50) C(51) 59.4(7) yes . . .
C(44) C(51) C(50) 71.4(8) yes . . .

loop_
_geom_torsion_atom_site_label_1
_geom_torsion_atom_site_label_2
_geom_torsion_atom_site_label_3
_geom_torsion_atom_site_label_4
_geom_torsion
_geom_torsion_publ_flag
_geom_torsion_site_symmetry_1
_geom_torsion_site_symmetry_2
_geom_torsion_site_symmetry_3
_geom_torsion_site_symmetry_4
O(1) Zr(1) O(2) C(8) 60.06(13) ? . . . .
O(1) Zr(1) O(2) C(35) -130.75(18) ? . . . .
O(2) Zr(1) O(1) C(1) 20.8(13) ? . . . .
O(1) Zr(1) O(3) C(15) 3.8(3) ? . . . .
O(3) Zr(1) O(1) C(1) 35.2(14) ? . . . .
O(1) Zr(1) C(36) Si(1) 57.06(16) ? . . . .
C(36) Zr(1) O(1) C(1) -100.2(13) ? . . . .
O(1) Zr(1) C(40) Si(2) 172.53(12) ? . . . .
C(40) Zr(1) O(1) C(1) 151.6(13) ? . . . .
O(2) Zr(1) O(3) C(15) 18.6(2) ? . . . .
O(3) Zr(1) O(2) C(8) -114.28(14) ? . . . .
O(3) Zr(1) O(2) C(35) 54.91(18) ? . . . .
O(2) Zr(1) C(36) Si(1) -29.82(19) ? . . . .
C(36) Zr(1) O(2) C(8) 156.63(14) ? . . . .
C(36) Zr(1) O(2) C(35) -34.2(2) ? . . . .
O(2) Zr(1) C(40) Si(2) -101.75(15) ? . . . .
C(40) Zr(1) O(2) C(8) -32.21(18) ? . . . .
C(40) Zr(1) O(2) C(35) 136.98(18) ? . . . .
O(3) Zr(1) C(36) Si(1) -107.25(15) ? . . . .
C(36) Zr(1) O(3) C(15) 139.7(2) ? . . . .
O(3) Zr(1) C(40) Si(2) -27.57(13) ? . . . .
C(40) Zr(1) O(3) C(15) -113.2(2) ? . . . .
C(36) Zr(1) C(40) Si(2) 70.41(15) ? . . . .
C(40) Zr(1) C(36) Si(1) 157.10(15) ? . . . .
C(37) Si(1) C(36) Zr(1) 36.1(2) ? . . . .
C(38) Si(1) C(36) Zr(1) 156.03(18) ? . . . .
C(39) Si(1) C(36) Zr(1) -81.72(19) ? . . . .
C(41) Si(2) C(40) Zr(1) 63.42(17) ? . . . .
C(42) Si(2) C(40) Zr(1) -59.23(18) ? . . . .
C(43) Si(2) C(40) Zr(1) -178.24(14) ? . . . .
Zr(1) O(1) C(1) C(2) 167.4(12) ? . . . .
Zr(1) O(1) C(1) C(6) -12.8(14) ? . . . .
Zr(1) O(2) C(8) C(9) -99.94(19) ? . . . .
Zr(1) O(2) C(8) C(13) 75.4(2) ? . . . .
C(35) O(2) C(8) C(9) 88.8(2) ? . . . .
C(35) O(2) C(8) C(13) -95.9(2) ? . . . .
Zr(1) O(3) C(15) C(16) 39.0(3) ? . . . .
Zr(1) O(3) C(15) C(20) -139.4(2) ? . . . .
O(1) C(1) C(2) C(3) -178.7(2) ? . . . .
O(1) C(1) C(2) C(21) 6.1(3) ? . . . .
O(1) C(1) C(6) C(5) 179.7(2) ? . . . .
O(1) C(1) C(6) C(7) -3.1(3) ? . . . .
C(2) C(1) C(6) C(5) -0.6(3) ? . . . .
C(2) C(1) C(6) C(7) 176.7(2) ? . . . .
C(6) C(1) C(2) C(3) 1.6(3) ? . . . .
C(6) C(1) C(2) C(21) -173.7(2) ? . . . .
C(1) C(2) C(3) C(4) -2.8(3) ? . . . .
C(1) C(2) C(21) C(22) 65.7(3) ? . . . .
C(1) C(2) C(21) C(23) -56.1(3) ? . . . .
C(1) C(2) C(21) C(24) -176.4(2) ? . . . .
C(3) C(2) C(21) C(22) -109.5(2) ? . . . .
C(3) C(2) C(21) C(23) 128.7(2) ? . . . .
C(3) C(2) C(21) C(24) 8.4(3) ? . . . .
C(21) C(2) C(3) C(4) 172.8(2) ? . . . .
C(2) C(3) C(4) C(5) 2.8(3) ? . . . .
C(2) C(3) C(4) C(25) -177.0(2) ? . . . .
C(3) C(4) C(5) C(6) -1.6(3) ? . . . .
C(25) C(4) C(5) C(6) 178.2(2) ? . . . .
C(4) C(5) C(6) C(1) 0.6(3) ? . . . .
C(4) C(5) C(6) C(7) -176.8(2) ? . . . .
C(1) C(6) C(7) C(9) -66.3(2) ? . . . .
C(5) C(6) C(7) C(9) 111.1(2) ? . . . .
C(6) C(7) C(9) C(8) 105.1(2) ? . . . .
C(6) C(7) C(9) C(10) -70.0(2) ? . . . .
O(2) C(8) C(9) C(7) 4.8(3) ? . . . .
O(2) C(8) C(9) C(10) -179.92(16) ? . . . .
O(2) C(8) C(13) C(12) 178.7(2) ? . . . .
O(2) C(8) C(13) C(14) -8.6(3) ? . . . .
C(9) C(8) C(13) C(12) -6.2(3) ? . . . .
C(9) C(8) C(13) C(14) 166.5(2) ? . . . .
C(13) C(8) C(9) C(7) -170.2(2) ? . . . .
C(13) C(8) C(9) C(10) 5.0(3) ? . . . .
C(7) C(9) C(10) C(11) 175.5(2) ? . . . .
C(8) C(9) C(10) C(11) 0.4(3) ? . . . .
C(9) C(10) C(11) C(12) -3.9(3) ? . . . .
C(9) C(10) C(11) C(26) 175.4(2) ? . . . .
C(10) C(11) C(12) C(13) 2.6(3) ? . . . .
C(10) C(11) C(26) C(27) -106.7(2) ? . . . .
C(10) C(11) C(26) C(28) 134.6(2) ? . . . .
C(10) C(11) C(26) C(29) 13.1(3) ? . . . .
C(12) C(11) C(26) C(27) 72.6(3) ? . . . .
C(12) C(11) C(26) C(28) -46.1(3) ? . . . .
C(12) C(11) C(26) C(29) -167.6(2) ? . . . .
C(26) C(11) C(12) C(13) -176.8(2) ? . . . .
C(11) C(12) C(13) C(8) 2.3(3) ? . . . .
C(11) C(12) C(13) C(14) -170.4(2) ? . . . .
C(8) C(13) C(14) C(16) 54.9(3) ? . . . .
C(12) C(13) C(14) C(16) -132.7(2) ? . . . .
C(13) C(14) C(16) C(15) -102.1(2) ? . . . .
C(13) C(14) C(16) C(17) 80.7(2) ? . . . .
O(3) C(15) C(16) C(14) 9.9(3) ? . . . .
O(3) C(15) C(16) C(17) -173.0(2) ? . . . .
O(3) C(15) C(20) C(19) 173.3(2) ? . . . .
O(3) C(15) C(20) C(30) -7.1(3) ? . . . .
C(16) C(15) C(20) C(19) -5.0(3) ? . . . .
C(16) C(15) C(20) C(30) 174.5(2) ? . . . .
C(20) C(15) C(16) C(14) -171.8(2) ? . . . .
C(20) C(15) C(16) C(17) 5.3(3) ? . . . .
C(14) C(16) C(17) C(18) 176.1(2) ? . . . .
C(15) C(16) C(17) C(18) -1.2(3) ? . . . .
C(16) C(17) C(18) C(19) -3.1(3) ? . . . .
C(16) C(17) C(18) C(34) 179.3(2) ? . . . .
C(17) C(18) C(19) C(20) 3.5(4) ? . . . .
C(34) C(18) C(19) C(20) -179.0(2) ? . . . .
C(18) C(19) C(20) C(15) 0.5(3) ? . . . .
C(18) C(19) C(20) C(30) -179.0(2) ? . . . .
C(15) C(20) C(30) C(31) -173.6(2) ? . . . .
C(15) C(20) C(30) C(32) -53.9(3) ? . . . .
C(15) C(20) C(30) C(33) 67.5(2) ? . . . .
C(19) C(20) C(30) C(31) 5.9(3) ? . . . .
C(19) C(20) C(30) C(32) 125.6(2) ? . . . .
C(19) C(20) C(30) C(33) -113.0(2) ? . . . .
C(45) C(44) C(49) C(48) 5.8(9) ? . . . .
C(49) C(44) C(45) C(46) -5.9(9) ? . . . .
C(45) C(44) C(50) C(51) -157.9(8) ? . . . .
C(50) C(44) C(45) C(46) -168.5(7) ? . . . .
C(45) C(44) C(51) C(50) 23.6(8) ? . . . .
C(51) C(44) C(45) C(46) 172.8(6) ? . . . .
C(49) C(44) C(50) C(51) 61.6(18) ? . . . .
C(50) C(44) C(49) C(48) 138.3(16) ? . . . .
C(49) C(44) C(51) C(50) -157.7(8) ? . . . .
C(51) C(44) C(49) C(48) -172.9(5) ? . . . .
C(44) C(45) C(46) C(47) 2.2(9) ? . . . .
C(45) C(46) C(47) C(48) 1.5(9) ? . . . .
C(46) C(47) C(48) C(49) -2.3(7) ? . . . .
C(47) C(48) C(49) C(44) -1.2(8) ? . . . .

loop_
_geom_contact_atom_site_label_1
_geom_contact_atom_site_label_2
_geom_contact_distance
_geom_contact_publ_flag
_geom_contact_site_symmetry_1
_geom_contact_site_symmetry_2
C(34) C(34) 3.364(5) ? . 3_455
C(35) C(48) 3.587(5) ? . .
C(48) C(35) 3.587(5) ? . .


#==============================================================================

# Additional structures and associated data_? identifiers
# should be added at this point if there is more than one 
# structure analysis in the CIF.

#==============================================================================

#     End of CIF

#==============================================================================
